# Supplementary material for: Respiratory chain polymorphisms and obesity in the Spanish population, a cross-sectional study
Source: PubMed Central journal article supplement — BMJ Open. 2019 Feb 5;9(2):e027004. doi: 10.1136/bmjopen-2018-027004 (PMC6377525; doi:10.1136/bmjopen-2018-027004), 2019-02-05
Supplement: bmjopen-2018-027004.draft_revisions.pdf [file bmjopen-2018-027004.draft_revisions.pdf]

# BMJ Open

BMJ Open is committed to open peer review. As part of this commitment we make the peer review history of every article we publish publicly available.

When an article is published we post the peer reviewers' comments and the authors' responses online. We also post the versions of the paper that were used during peer review. These are the versions that the peer review comments apply to.

The versions of the paper that follow are the versions that were submitted during the peer review process. They are not the versions of record or the final published versions. They should not be cited or distributed as the published version of this manuscript.

BMJ Open is an open access journal and the full, final, typeset and author-corrected version of record of the manuscript is available on our site with no access controls, subscription charges or pay-per-view fees (<http://bmjopen.bmj.com>).

If you have any questions on BMJ Open's open peer review process please email [info.bmjopen@bmj.com](mailto:info.bmjopen@bmj.com)

# BMJ Open

## RESPIRATORY CHAIN POLYMORPHISMS AND OBESITY IN SPANISH POPULATION, A CROSS-SECTIONAL STUDY

|                               |                                                                                                                                                                                                                                                                                                                                                                                                                                                                                                                                                                                                                                                                                                                                                                                                                                                                                                                                                                                                                                                                                                                                                                                                                                                                                                                                                                                                                                                                                                                                                                                                                                                                                                                                                                                                                                                                                                                           |
|-------------------------------|---------------------------------------------------------------------------------------------------------------------------------------------------------------------------------------------------------------------------------------------------------------------------------------------------------------------------------------------------------------------------------------------------------------------------------------------------------------------------------------------------------------------------------------------------------------------------------------------------------------------------------------------------------------------------------------------------------------------------------------------------------------------------------------------------------------------------------------------------------------------------------------------------------------------------------------------------------------------------------------------------------------------------------------------------------------------------------------------------------------------------------------------------------------------------------------------------------------------------------------------------------------------------------------------------------------------------------------------------------------------------------------------------------------------------------------------------------------------------------------------------------------------------------------------------------------------------------------------------------------------------------------------------------------------------------------------------------------------------------------------------------------------------------------------------------------------------------------------------------------------------------------------------------------------------|
| Journal:                      | <i>BMJ Open</i>                                                                                                                                                                                                                                                                                                                                                                                                                                                                                                                                                                                                                                                                                                                                                                                                                                                                                                                                                                                                                                                                                                                                                                                                                                                                                                                                                                                                                                                                                                                                                                                                                                                                                                                                                                                                                                                                                                           |
| Manuscript ID                 | bmjopen-2018-027004                                                                                                                                                                                                                                                                                                                                                                                                                                                                                                                                                                                                                                                                                                                                                                                                                                                                                                                                                                                                                                                                                                                                                                                                                                                                                                                                                                                                                                                                                                                                                                                                                                                                                                                                                                                                                                                                                                       |
| Article Type:                 | Research                                                                                                                                                                                                                                                                                                                                                                                                                                                                                                                                                                                                                                                                                                                                                                                                                                                                                                                                                                                                                                                                                                                                                                                                                                                                                                                                                                                                                                                                                                                                                                                                                                                                                                                                                                                                                                                                                                                  |
| Date Submitted by the Author: | 01-Oct-2018                                                                                                                                                                                                                                                                                                                                                                                                                                                                                                                                                                                                                                                                                                                                                                                                                                                                                                                                                                                                                                                                                                                                                                                                                                                                                                                                                                                                                                                                                                                                                                                                                                                                                                                                                                                                                                                                                                               |
| Complete List of Authors:     | <p>de marco, griselda; Research Foundation of Valencia University Clinic Hospital-INCLIVA, Genomic and Genetic Diagnosis Unit<br/> Garcia-Garcia, Ana Barbara; CIBER of Diabetes and Associated Metabolic Diseases (CIBERDEM); Research Foundation of Valencia University Clinic Hospital-INCLIVA<br/> Real, Jose; University Clinical Hospital and INCLIVA, Service of Endocrinology and Nutrition; CIBER of Diabetes and Associated Metabolic Diseases (CIBERDEM)<br/> Gonzalez-Albert, Veronica; Research Foundation of Valencia University Clinic Hospital-INCLIVA, Genomic and Genetic Diagnosis Unit<br/> Briongos-Figuero, Laisa; Rio Hortega University Hospital, Internal Medicine Service<br/> Cobos-Siles, Marta; Rio Hortega University Hospital, Internal Medicine Service<br/> Lago-Sampedro, Ana; IBIMA.Regional University Hospital of Malaga, UMA,, Endocrinology and Nutrition Department; CIBER of Diabetes and Associated Metabolic Diseases (CIBERDEM)<br/> Corbaton, Arturo; Biomedical Research Foundation. University Hospital Clínico San Carlos, Diabetes Research Laboratory; CIBER of Diabetes and Associated Metabolic Diseases (CIBERDEM)<br/> Teresa Martinez-Larrad, Maria; Biomedical Research Foundation. University Hospital Clínico San Carlos, Diabetes Research Laboratory; CIBER of Diabetes and Associated Metabolic Diseases (CIBERDEM)<br/> Carmena, Rafael; University of Valencia, Department of Medicine<br/> Martin-Escudero, Juan; Rio Hortega University Hospital, Internal Medicine Service<br/> Rojo, Gemma; IBIMA.Regional University Hospital of Malaga, UMA,, Endocrinology and Nutrition Department; CIBER of Diabetes and Associated Metabolic Diseases (CIBERDEM)<br/> Chaves, Felipe; Research Foundation of Valencia University Clinic Hospital-INCLIVA, Genomic and Genetic Diagnosis Unit; CIBER of Diabetes and Associated Metabolic Diseases (CIBERDEM)</p> |
| Keywords:                     | Obesity, SNP, mitochondrial respiratory chain                                                                                                                                                                                                                                                                                                                                                                                                                                                                                                                                                                                                                                                                                                                                                                                                                                                                                                                                                                                                                                                                                                                                                                                                                                                                                                                                                                                                                                                                                                                                                                                                                                                                                                                                                                                                                                                                             |
|                               |                                                                                                                                                                                                                                                                                                                                                                                                                                                                                                                                                                                                                                                                                                                                                                                                                                                                                                                                                                                                                                                                                                                                                                                                                                                                                                                                                                                                                                                                                                                                                                                                                                                                                                                                                                                                                                                                                                                           |

1  
2  
3  
4  
5  
6  
7  
8  
9  
10  
11  
12  
13  
14  
15  
16  
17  
18  
19  
20  
21  
22  
23  
24  
25  
26  
27  
28  
29  
30  
31  
32  
33  
34  
35  
36  
37  
38  
39  
40  
41  
42  
43  
44  
45  
46  
47  
48  
49  
50  
51  
52  
53  
54  
55  
56  
57  
58  
59  
60

For peer review only

1  
2 **RESPIRATORY CHAIN POLYMORPHISMS AND OBESITY IN SPANISH**  
3 **POPULATION, A CROSS-SECTIONAL STUDY**  
4  
5  
6  
7

8  
9 Griselda De Marco<sup>1</sup>, Ana Barbara García-García<sup>1, 2</sup>, Jose Tomas Real<sup>2,3,4</sup>, Veronica Gonzalez-  
10 Albert <sup>1</sup>, Laisa-Socorro Briongos-Figuero<sup>5</sup>, Marta Cobos-Siles<sup>5</sup>, Ana Lago-Sampedro <sup>2,6</sup>, Arturo  
11 Corbaton<sup>2,7</sup>, Maria T. Martinez-Larrad<sup>2,7</sup>, Rafael Carmena<sup>4</sup>, Juan Carlos Martín Escudero<sup>5</sup>,  
12 Gemma Rojo-Martínez<sup>2,6</sup>, Felipe Javier Chaves<sup>1,2</sup>.  
13  
14  
15  
16  
17  
18

19 <sup>1</sup> Genomic and Genetic Diagnosis Unit. Research Foundation of Valencia University Clinical  
20 Hospital-INCLIVA. Valencia, Spain.  
21  
22

23 <sup>2</sup> CIBER of Diabetes and Associated Metabolic Diseases (CIBERDEM), Madrid. Spain.  
24  
25

26 <sup>3</sup> Service of Endocrinology and Nutrition, University Clinical Hospital and INCLIVA, Valencia,  
27 Spain.  
28  
29

30 <sup>4</sup> Department of Medicine, University of Valencia, Valencia, Spain  
31  
32

33 <sup>5</sup> Internal Medicine Service. Rio Hortega University Hospital. Valladolid, Spain  
34  
35

36 <sup>6</sup> Endocrinology and Nutrition Department. IBIMA.Regional University Hospital of Malaga,  
37 UMA, Malaga, Spain  
38  
39

40 <sup>7</sup> Diabetes Research Laboratory. Biomedical Research Foundation. University Clinical Hospital  
41 San Carlos. Madrid Spain.  
42  
43  
44  
45

46 Corresponding author: Ana-Barbara Garcia-Garcia.  
47

48 e-mail address: [a.barbara.garcia@ext.uv.es](mailto:a.barbara.garcia@ext.uv.es). Current address: Menendez Pelayo 4acc, Valencia  
49 46010. Telephone number: 0034-963864100 ext 83916  
50  
51  
52

53 Word count: excluding title page, abstract, references figures and tables: 2433  
54  
55  
56  
57  
58  
59  
60

**ABSTRACT**

**OBJECTIVE:** To study the association between genes involved in Mitochondrial Respiratory Chain (MRC) pathway with Body Mass Index (BMI) and obesity risk.

**DESIGN:** This work studies 3 different cross-sectional populations from Spain: HORTEGA and SEGOVIA (center), and PIZARRA (South). These populations represent zones with different characteristics.

**SETTING:** Forty-eight SNPs from MRC genes were selected and genotyped by SNPlex method. Association studies with BMI and obesity risk were performed for each population. These associations were then verified by carrying out the analysis in the whole studied population (3731 samples).

**PARTICIPANTS:** a total of 3731 Caucasian individuals: 1502 samples from HORTEGA, 988 from PIZARRA and 1241 from SEGOVIA.

**RESULTS:** Associations between rs4600063 (SDHC), rs11205591 (NDUFS5), rs10891319 (SDHD) SNPs, BMI and obesity risk were observed (BMI p values 0.04, 0.0011 and 0.0004, respectively. Obesity risk p values 0.0072, 0.039 and 0.0038). In addition, rs11205591 and rs10891319 polymorphisms showed an epistatic interaction for BMI levels and obesity risk.

**CONCLUSIONS:** Several polymorphisms from genes coding MRC proteins may be involved in BMI variability and could be related to the risk to become obese in the Spanish general population.

**KEYWORDS:** Obesity, SNP, mitochondrial respiratory chain,

**STRENGTHS AND LIMITATIONS OF THIS STUDY:**

- This work has been performed in 3 general populations from Spain, with different characteristics.
- Unless the number of individuals in this study is limited, the statistical power is sufficient for the number of analyzed SNPs.
- Results from this work should be confirmed with larger sample sizes.

## INTRODUCTION

Obesity is a metabolic disorder consisting of excess body fat accumulation. Obesity prevalence has been increasing during the last decades in Western Societies, becoming one of the most important public health problems. This is due to the fact that obesity is causally related to several chronic diseases such as insulin resistance (IR), cardiovascular disease (CVD) and type 2 diabetes mellitus (T2DM).[1]

Susceptibility to obesity is determined by environmental and genetic factors. Although the increment of obesity prevalence is triggered by changes in lifestyle, the risk to develop obesity has an important genetic component, which has been considered in a large number of studies.[2-4] Rare mutations in genes encoding for appetite-regulating proteins, such as leptin (*LEP*) and its receptor (*LEPR*), melanocortin-4 receptor (*MC4R*) and pro-opiomelanocortin (*POMC*), have shown to cause severe early-onset obesity.[5-6] Genome wide association studies (GWAS) have allowed for the identification of common polymorphisms located in, or near to, 97 loci, most of them expressed in the central nervous system.[6-10] However, it is also known that, due to limitations of GWAS, studies around 250 common variants with a similar effect to those described previously remain to be identified.[8]

The study of target genes or genes involved in a particular physiological pathway is a

1  
2 potential approximation for identification of genetic variants with roles in complex traits. The  
3  
4 mitochondrial respiratory chain (MRC) is a biological system involved in carbohydrate and lipid  
5  
6 metabolism through oxidative phosphorylation. MRC produces the proton gradient needed for  
7  
8 ATP synthesis and is composed by four large complexes (I to IV) that transport electrons from  
9  
10 donors (NADH at complex I, FADH<sub>2</sub> at complex II) to acceptors. Finally, electrons in complex  
11  
12 IV are conducted to the last acceptor, the molecular oxygen.[11] Mitochondrial oxidative  
13  
14 capacity dysfunction in liver, muscle or adipose tissue could contribute to the intracellular  
15  
16 accumulation of fatty acids observed in obesity.[12-13] Insulin resistance has been associated to  
17  
18 lower mitochondria activity at rest.[14] This may be the result of inherited defects in genes  
19  
20 coding MRC proteins.  
21  
22  
23

24  
25 Mutations of MRC genes resulting in loss of function have been described to produce  
26  
27 diseases with important disabilities.[15-18] In addition, studies on their impact on energy  
28  
29 efficiency and expenditure have shown an association with the risk to develop obesity.[12, 19-  
30  
31 21] On the other hand, studies have shown that obesity affects the function of mitochondria,  
32  
33 leading to mitochondrial dysfunction.[22] Mitochondrial dynamics play a role in metabolism and  
34  
35 obesity: MFN2, a gene coding for a GTPase in the outer mitochondrial membrane is involved in  
36  
37 mitochondrial fusion, regulating the operation of the mitochondrial network in skeletal muscle.  
38  
39 When MFN2 is repressed, glucose oxidation and mitochondrial membrane potential are  
40  
41 impaired.[23] It has been shown that expression of MNF2 is repressed in obese patients  
42  
43 compared to lean.[23] Furthermore, polymorphisms in MRC genes, or others related to its  
44  
45 regulation, have been related to obesity in different populations.[23-25]  
46  
47  
48  
49  
50  
51

52 The aim of this study was to find associations between MRC nuclear genes, BMI and  
53  
54 obesity in three different Spanish studies in the general population.  
55  
56  
57  
58  
59  
60

## MATERIALS AND METHODS

### Sample Populations

We have independently analyzed 3 general Spanish populations, which were originally recruited for the study of cardiovascular risk factors and cardiovascular disease development: HORTEGA (1502 subjects collected from 2004 to 2005), PIZARRA (988 individuals, collected from 2009 and 2010) and SEGOVIA (1239 subjects, collected between 2000 and 2003) studies. [26-28] The HORTEGA sample involves subjects from the Valladolid area (North-western Spain). The PIZARRA sample comprises subjects from Pizarra, a town in the Malaga province (Andalusia, Southern Spain). The SEGOVIA sample comprises subjects from the Segovia Province (Center of Spain). These 3 populations were recruited to identify cardiovascular risk factors in general population as a general goal. Individuals were randomly selected and invited to participate. Exclusion criteria were any concomitant disease or condition that prevented them from answering a survey, sample donation or influencing the collection of reliable information. The studies were approved by the specific institutional Research and Ethics Committees, and all patients signed an informed consent to take part in the investigations. The research was carried out according to The Code of Ethics of the World Medical Association (Declaration of Helsinki)

Demographic data and anthropometric parameters were collected under standard procedures. Presence of obesity, hypertension (HTN) and Type 2 Diabetes mellitus (T2DM) was registered. BMI was calculated by dividing weight in kg by height in meters squared. Obesity, HTN and T2DM were defined using the World Health Organization (WHO) criteria (<http://www.who.int>). Briefly, obesity was diagnosed with a BMI >30 kg/m<sup>2</sup> and HTN was



1 defined by systolic and diastolic blood pressure above 140 or 90 mm Hg, respectively. T2DM  
2 was defined by fasting plasma glucose  $\geq$  126mg/dl or 2-hour plasma glucose  $\geq$  200mg/dl.  
3  
4 Previous diagnosis of T2DM or HTN and detection of the disease at the moment of sample  
5  
6 collection were registered. Missing data for parameters regarding this work were (expressed as  
7  
8 HORTEGA missing data / PIZARRA missing data / SEGOVIA missing data) 58/58/6 for BMI  
9  
10 and 1/85/63 for glucose.  
11  
12  
13  
14  
15  
16  
17

### 18 **Genotyping methods**

19 Genes and SNPs selection:

20  
21 Forty-eight single nucleotide polymorphisms (SNPs) of chromosomal genes coding for MRC  
22  
23 proteins were selected for genotyping. Selection was performed based on the following  
24  
25 considerations: functionality (previously described or possible effect), minor allele frequency  
26  
27 (MAF)  $\geq$ 1%, representation of genetic variability of the whole gene (HapMap polymorphisms),  
28  
29 and spacing along the gene. Most important variants described in the literature were included.  
30  
31  
32 Details of genes and SNPs included are shown as supplemental material (Table 1S).  
33  
34  
35  
36  
37  
38

39 Genotyping procedure:

40  
41 Venous blood samples were collected in tubes containing EDTA. DNA was isolated by standard  
42  
43 commercial procedures (Chemagic Magnetic Separator from Chemagen, Baesweiler, Germany).  
44  
45 DNA was quantified and diluted to a final concentration of 100 ng/ul.  
46  
47

48 SNPLEX (Applied Biosystems, Foster City, California, USA) was used for genotyping,  
49  
50 following the manufacturer's guidelines. SNPLEX is a genotyping system based on  
51  
52 oligonucleotide ligation assay/polymerase chain reaction technology that analyzes 48 SNPs.  
53  
54 Those SNPs were chosen as explained above.  
55  
56  
57  
58  
59  
60

## Statistical analysis

Statistical analyses were performed using SPSS version 19 and SNPStats software.[29]

Analysis of variance and chi-squared test were used to compare quantitative and categorical variables between groups in order to assess general characteristics of the studied populations. P-values  $\leq 0.05$  were considered significant.

When analyzing for associations between SNPs and obesity traits in the 3 populations, 11 out of the 48 SNPs were excluded from the study because they did not fulfill the Hardy-Weinberg equilibrium, had low frequency, or were not detectable by the genotyping procedure. The Bonferroni correction cut off to assess significant associations was calculated for the 37 remaining SNPs. Those polymorphisms associated in at least one out of the three populations and showing the same tendency in the remaining ones, or results with p-values near the significance cut off point in the 3 studies, were also analyzed in the 3729 total subjects from the 3 populations. For these analyses, multivariate logistic regression under co-dominant model was performed and, if applicable, dominant, recessive, or additive models were used. For categorical variables, adjusted odds ratios were assessed with 95% confidence interval. The association between polymorphisms and BMI values was examined using analysis of covariance (ANCOVA). All p-values were two-sided. All results were obtained after adjustment by age and gender, and p-values  $< 0.05$  were considered significant.

## Patient and Public involvement

Patients and public were not actively involved in this research. They were informed regarding the research goals, protocol development and parameters to be measured before starting the study. If appropriate, they were informed regarding results.

## RESULTS

### Characteristics of the studied populations

General characteristics of the studied populations are summarized in Table 1. Age, gender and BMI were different between the 3 populations. There were differences in obesity and T2DM percentage: obesity prevalence was 17%, 26% and 33% for Hortega, Segovia and Pizarra studies, respectively, while T2DM prevalence was 7.6%, 10.2% and 19.6%

**Table 1:** General features of Hortega, Pizarra and Segovia patients considered individually and as a whole population

|                               | Hortega                | Pizarra                   | Segovia                  | Whole Population         |
|-------------------------------|------------------------|---------------------------|--------------------------|--------------------------|
| <b>N</b>                      | 1502                   | 988                       | 1241                     | 3731                     |
| <b>Age (Years)</b>            | 54.4 ± 19.3*           | 46.1 ± 13.9***            | 51.9 ± 10.8**            | 51.4 ± 15.9              |
| <b>Height (m)</b>             | 163.7 ± 10.0*          | 161 ± 8.8                 | 161.4 ± 9.0**            | 162.2 ± 9.4              |
| <b>Weight (Kg)</b>            | 70.8 ± 12.9*           | 74.1 ± 4.3***             | 72.1 ± 12.4**            | 72.1 ± 13.2              |
| <b>BMI (Kg/m<sup>2</sup>)</b> | 26.4 ± 4.2*            | 28.6 ± 5.3***             | 27.7 ± 4.3**             | 27.4 ± 4.6               |
| <b>Gender (M(%)/F(%))</b>     | 754(50.2) / 748(49.8)* | 365(36.9) / (616(62.3)*** | 562(45.3) / (679(54.7)** | 2043(54.8) / (1681(45.1) |
| <b>Obesity (N(%))</b>         | 262(17.4)*             | 331(33.5)***              | 319(25.7)**              | 912(24.4)                |

M: Male. F: Female. Values expressed as mean ± SD except for gender and obesity. P value <0.05 was considered significant. \*for p<0.05 when comparing Hortega with Pizarra, \*\* p<0.05 when comparing Hortega and Segovia, \*\*\* for p<0.05 when comparing Pizarra and Segovia

### Association between MRC genes SNPs and obesity

We performed the analysis looking for associations between SNPs, BMI and obesity risk in the 3 independent populations. Table 2 shows results for those SNPS with differences in at least one of the 3 populations and a similar trend in the remaining ones, or that had p-values near the significance cut off point ( $p \leq 0.05$ ) in the 3 studies: rs1136224 (NDUFS2 gene), rs11205591 (NDUFS5), rs4600063 (SDHC), rs683943 (COX7A2), rs3770989 (NDUFS1) and rs10891319 (SDHD). These 6 SNPs were selected for further analysis in the whole population.

**Table 2:** BMI and obesity risk of associated SNPs for Horteiga, Pizarra and Segovia populations.

|                   | Geno-<br>type | HORTEGA |                             |                          | PIZARRA |                             |                          | SEGOVIA |                          |                       |
|-------------------|---------------|---------|-----------------------------|--------------------------|---------|-----------------------------|--------------------------|---------|--------------------------|-----------------------|
|                   |               | N       | BMI<br>(Kg/m <sup>2</sup> ) | Obesity<br>OR<br>(95%CI) | N       | BMI<br>(Kg/m <sup>2</sup> ) | Obesity<br>OR<br>(95%CI) | N       | Obesity<br>OR<br>(95%CI) | Obesity OR<br>(95%CI) |
| <b>SDHC</b>       | AA            | 1250    | 26.46±0.12                  | 1                        | 772     | 28.70±0.19                  | 1                        | 943     | 27.71±0.10               | 1                     |
| <b>rs4600063</b>  | AG-GG         | 183     | 26.16±0.30                  | 0.82<br>(0.55-1.22)      | 96      | 27.86±0.04                  | 0.47<br>(0.28-0.78)      | 132     | 27.21±0.30               | 0.88<br>(0.57-1.36)   |
| <b>HWE:1</b>      | p-value       |         | 0.9                         | 0.33                     |         | 0.071                       | <b>0.0025</b>            |         | 0.22                     | 0.57                  |
| <b>COX7A2</b>     | CC-CG         | 1410    | 26.40±0.11                  | 1                        | 865     | 28.58±0.10                  | 1                        | 1074    | 27.62±0.10               | 1                     |
| <b>rs683943</b>   | GG            | 4       | 28.76±2.16                  | 2.65<br>(0.33-21.1)      | 4       | 32.33±0.30                  | NA<br>(0.00-NA)          | 2       | 31.18±4.60               | 3.17<br>(0.19-52.05)  |
| <b>HWE:0.6</b>    | p-value       |         | 0.3                         | 0.36                     |         | <b>0.044</b>                | <b>0.001</b>             |         | 0.22                     | 0.43                  |
| <b>NDUFS1</b>     | TT            | 1308    | 26.41±0.12                  | 1                        | 799     | 28.49±0.10                  | 1                        | 1028    | 27.56±0.10               | 1                     |
| <b>rs3770989</b>  | CT-CC         | 114     | 26.62±0.44                  | 1.13<br>(0.72-1.77)      | 77      | 29.85±0.60                  | 1.5<br>(0.91-2.48)       | 65      | 27.92±0.60               | 1.28<br>(0.73-2.23)   |
| <b>HWE:1</b>      | p-value       |         | 0.34                        | 0.6                      |         | <b>0.016</b>                | 0.12                     |         | 0.48                     | 0.39                  |
| <b>NDUFS2</b>     | AA-AG         | 1379    | 26.43±0.11                  | 1                        | 838     | 28.59±0.10                  | 1                        | 1051    | 27.57±0.10               | 1                     |
| <b>rs1136224</b>  | GG            | 35      | 26.12±0.79                  | 2.34<br>(1.11-4.91)      | 25      | 29.12±0.70                  | 1.24<br>(0.52-2.95)      | 20      | 28.83±0.90               | 2.47<br>(1.00-6.06)   |
| <b>HWE:0.36</b>   | p-value       |         | 0.65                        | <b>0.047</b>             |         | 0.66                        | 0.63                     |         | 0.27                     | 0.055                 |
| <b>NDUFS5</b>     | CC-CG         | 1309    | 26.47±0.12                  | 1                        | 832     | 28.63±0.10                  | 1                        | 947     | 27.6±0.14                | 1                     |
| <b>rs11205591</b> | GG            | 115     | 25.78±0.31                  | 0.67<br>(0.41-1.10)      | 38      | 27.66±0.70                  | 0.86<br>(0.41-1.81)      | 89      | 27.21±0.40               | 0.89<br>(0.53-1.5)    |
| <b>HWE:0.76</b>   | p-value       |         | <b>0.049</b>                | 0.11                     |         | 0.38                        | 0.69                     |         | 0.25                     | 0.66                  |
| <b>SDHD</b>       | AA            | 691     | 26.16±0.16                  | 1                        | 401     | 28.18±0.26                  | 1                        | 571     | 27.37±0.17               | 1                     |
| <b>rs10891319</b> | AG-GG         | 726     | 26.64±0.16                  | 1.16<br>(0.90-1.49)      | 478     | 29.00±0.24                  | 1.22<br>(0.91-1.64)      | 492     | 27.83±0.19               | 1.27<br>(0.96-1.68)   |
| <b>HWE:0.22</b>   | p-value       |         | 0.08                        | 0.25                     |         | 0.084                       | 0.18                     |         | 0.077                    | 0.095                 |

BMI: mean ± SD . OR: odds ratio; 95%CI: 95% confidence interval. HWE: Hardy Weinberg Equilibrium. N: Number of individuals. Bold: significant

When analyzing these 6 SNPS in the total population, there were 4 polymorphisms associated to BMI: rs4600063, rs10891319, rs3770989, rs11205591, located in the SDHC, SDHD, NDUFS1 and NDUFS5, genes respectively. Results for these 4 SNPs are shown in Table 3: rs4600063 and rs3770989 showed low association levels with BMI that did not remain

significant after Bonferroni correction ( $p < 0.0013$ ). Rs10891319 and rs11205591 showed significant associations with BMI after Bonferroni correction, with a p-value of 0.0004 for the first one and 0.0011 for the second one. On the other hand, rs4600063 and rs11205591 reduce obesity risk, while rs10891319 increases the risk ( $p < 0.05$ ).

**Table 3:** SNP Genotyping: distribution of BMI levels and the obesity risk associated between all genotypes in whole population.

| Gene/SNP           | Genotype | N    | BMI (Kg/m <sup>2</sup> ) | Non Obesity (N(%)) | Obesity (N(%)) | OR (95% CI)         |
|--------------------|----------|------|--------------------------|--------------------|----------------|---------------------|
| <b>SDHC</b>        | AA       | 2965 | 27.44±0.08               | 2109(86.9)         | 851(90.4)      | 1                   |
| <b>rs4600063</b>   | AG-GG    | 411  | 26.89±0.21               | 318(13.1)          | 90(9.6)        | 0.72<br>(0.56-0.92) |
|                    | p-value  |      | <b>0.04</b>              |                    |                | <b>0.0072</b>       |
| <b>SDHD</b>        | AA       | 1663 | 27.06±0.11               | 1243(51.3)         | 422(45.4)      | 1                   |
| <b>rs10891319</b>  | AG-GG    | 1696 | 27.60±0.11               | 1178(48.7)         | 508(54.6)      | 1.25<br>(1.08-1.46) |
|                    | p-value  |      | <b>0.0004</b>            |                    |                | <b>0.0038</b>       |
| <b>NDUFS1</b>      | TT       | 3135 | 27.32±0.08               | 2273(92.9)         | 857(91.2)      | 1                   |
| <b>rs3770989</b>   | CT-CC    | 256  | 27.92±0.32               | 173(7.1)           | 83(8.8)        | 1.30<br>(0.99-1.72) |
|                    | p-value  |      | <b>0.026</b>             |                    |                | 0.066               |
| <b>NDUFS5</b>      | CC-CG    | 3088 | 27.40±0.08               | 2219(92.3)         | 863(94)        | 1                   |
| <b>rs11205591*</b> | GG       | 242  | 26.60±0.24               | 184(7.7)           | 55(6)          | 0.72<br>(0.52-0.99) |
|                    | p-value  |      | <b>0.0011</b>            |                    |                | <b>0.039</b>        |

OR: odds ratio; 95%CI: confidence interval 95%. Values of BMI are expressed as mean ± standard deviation. Results after adjustment for the following variables included in the model: age and gender. N: Number of individuals. \*tag-SNP.

Figure 1 shows BMI differences for rs10891319 and rs11205591 polymorphisms in each independent population and the whole one. A similar trend may be observed in both figures 1A

1  
2 and 1B, although only the rs11205591 SNP reaches significant association at the HORTEGA  
3  
4 study ( $p \leq 0.05$ ).  
5  
6  
7

8  
9 An additive effect for rs11205591 and rs10891319 SNPs was found in the whole sample:  
10 patients carrying GG/AA combination presented significant lower BMI (Figure 2A) and lower  
11 obesity risk (Figure 2B) than patients carrying CC-CG / AG-GG genotypes (data are expressed  
12 as rs11205591 genotype / rs10891319 genotype).  
13  
14  
15  
16  
17  
18  
19  
20  
21

## 22 **DISCUSSION**

23  
24  
25  
26  
27 The goal of this population-based study was to analyze MRC SNPs and their association with  
28 BMI and obesity risk in three different Spanish populations. Those SNPs with the most relevant  
29 associations were tested in the pooled sample.  
30  
31  
32  
33

34 Our group has found a significant protective association for the risk of obesity for  
35 rs10891319 AA carriers and for patients with the rs11205591 GG genotype, who also showed  
36 reduced BMI. Despite differences in age, sex, BMI and obesity prevalence between the three  
37 samples, a similar trend was found considering them individually, while that which corresponded  
38 to rs10891319 was the strongest at the whole sample. Furthermore, an epistatic interaction was  
39 observed between these 2 SNPs, being 1.4 kg/m<sup>2</sup> the maximal BMI difference found between  
40 genotypes (CC-GG / AA-GG vs GG / AA carriers, expressed as rs11205591/ rs10891319  
41 genotype carriers). In agreement with these findings, significant differences for obesity risk were  
42 also found.  
43  
44  
45  
46  
47  
48  
49  
50  
51  
52  
53  
54  
55  
56  
57  
58  
59  
60

1  
2 Another SNP, rs3770989, associated with BMI in one of the three populations and in the  
3 whole group, is located in the 3'UTR region of the NDUFS1 gene, which codes for NADH  
4 dehydrogenase (ubiquinone) Fe-S protein 1. In silico analysis at TargetScanHuman program  
5 ([http://www.targetscan.org/vert\\_50/](http://www.targetscan.org/vert_50/)) showed that this SNP is located between two regions of  
6 miRNA binding sites, although it does not seem to affect any of them.[30,31] On the other hand,  
7 the rs11205591 and rs10891319 SNPs are located in 3' regions of NDUFS5 and SDHD genes  
8 respectively. Although these SNPs have an unknown functional effect, they could be in linkage  
9 disequilibrium with other truly functional polymorphisms. New studies should be performed to  
10 address this question.  
11  
12  
13  
14  
15  
16  
17  
18  
19  
20  
21

22 The first gene consistently identified as an obesity gene using GWAS was FTO. Several  
23 SNPs located on its first intron were associated with BMI in European, East Asian and African  
24 populations. [32,33] Following this gene, 75 additional obesity loci have been identified using  
25 this methodology and, although FTO is the gene accounting for most of the inter-individual  
26 variability on BMI, it only explains a 0.34%.[8,33] There are data supporting that alterations in  
27 genes related to mitochondrial function can be involved in obesity, [12,15,20,21,34] but only few  
28 studies have analyzed the effect of its variations on BMI or obesity.[19,24] From all genes  
29 identified in the GWAS meta-analysis performed by Speliotes and colleagues,[8] only the  
30 NDUFS3 (NADH dehydrogenase (ubiquinone) Fe-S protein 3) gene was identified to be within  
31 300 Kb from the BMI associated SNPs. As these authors indicated, in spite of the large  
32 population analyzed in their study, many genetic variants related to BMI and obesity remain to  
33 be identified. The limitations of this meta-analysis come from the different microarrays used,  
34 with low coverage in many genomic regions. Therefore, NDUFS5 gene (where rs11205591 is  
35 placed) has been analyzed by only one polymorphism in each of the two most used microarrays  
36 by Speliotes and in most of the GWAS performed up to now;[8] <http://www.Illumina.com>;  
37  
38  
39  
40  
41  
42  
43  
44  
45  
46  
47  
48  
49  
50  
51  
52  
53  
54  
55  
56  
57  
58  
59  
60



1  
2 <http://www.affymetrix.com>; <http://www.ensembl.org>). In addition, representation of  
3  
4 Mediterranean populations in Speliotes' and Locke studies is very small, and, to our knowledge,  
5  
6 Spanish populations are not included.[8,9] Therefore, many important genetic regions, related to  
7  
8 BMI and obesity regulation in these populations may be missing from their work.  
9

10  
11 The present study supports the hypothesis that genetic variations on MRC genes may be  
12  
13 related to obesity susceptibility in the Spanish population. Therefore, these genes could be new  
14  
15 therapeutic targets. Genetics of obesity are complex and not well identified yet, and our data may  
16  
17 contribute to a better understanding. Further functional studies and association analyses in larger  
18  
19 samples and other populations should be carried out to confirm our results.  
20  
21  
22  
23  
24  
25  
26

## 27 **AUTHOR CONTRIBUTIONS**

28  
29 **G.DM-S.** obtained genetic data, analyzed and interpreted results and wrote the manuscript. **VGA**  
30  
31 obtained genetic data, contributed to its analysis and interpretation and reviewed the  
32  
33 manuscript. **JTR, LSBF, MCS, ALS, AC** obtained population data, made critical revisions of  
34  
35 the manuscript and contributed to the discussion. **JCME, GRM, RC, MTML** contributed to  
36  
37 population studies, discussion and reviewed/edited the manuscript. **FJC** and **ABGG** designed  
38  
39 the study, wrote the manuscript, contributed to discussion and reviewed/edited manuscript.  
40  
41  
42  
43  
44

## 45 **ACKNOWLEDGEMENTS**

46  
47 We would like to thank Dr. Manuel Serrano-Rios (Diabetes Research Laboratory, Biomedical  
48  
49 Research Foundation from the University Hospital Clínico San Carlos (Madrid ,Spain) and  
50  
51 CIBER of Diabetes and Associated Metabolic Diseases (CIBERDEM), Madrid. Spain) for his  
52  
53 kind contribution in the development of this work.  
54  
55

## 56 **FUNDING**

1  
2 This study was supported by CIBER Fisiopatología, Obesidad y Nutrición (CIBEROB) and  
3  
4 CIBER Diabetes y Enfermedades Metabólicas Asociadas (CIBERDEM), initiatives of Carlos III  
5  
6 Health Institute, Spanish Health Ministry; Project INGENFRED CIBER-02-08-2009  
7  
8 (CIBERDEM); research grants PI070497, PI081592, PI14/00874 and PIE14/00031 from the  
9  
10 Fondo de Investigaciones Sanitarias; ACOMP/2009/201, GRUPOS03/101, 2005/027 and  
11  
12 PROMETEO/2009/029 from the Valencian Government and grant SAF2005-02883 from the  
13  
14 Spanish Ministry of Education and Science; GRS 279/A/08 of Regional Health Management of  
15  
16 Castilla y León, Junta de Castilla y León.  
17  
18  
19  
20  
21

## 22 **DISCLAIMER**

23  
24 Neither funder played a role in the study design, data analysis or interpretation of the data.  
25  
26  
27  
28

## 29 **COMPETING INTERESTS**

30  
31 There are not competing interests to declare  
32  
33  
34  
35

## 36 **DATA SHARING STATEMENT**

37  
38 No additional data are available.  
39  
40  
41  
42  
43  
44  
45  
46  
47  
48  
49  
50  
51  
52  
53  
54  
55  
56  
57  
58  
59  
60

## REFERENCES

1. Marques A, Peralta M, Naia A, et al. Prevalence of adult overweight and obesity in 20 European countries, 2014. *Eur J Public Health* 2018;28:295-300.
2. Stunkard AJ, Foch TT, Hrubec Z. A twin study of human obesity. *JAMA* 1986;256:51-54.
3. Chung WK, Leibel RL. Considerations regarding the genetics of obesity. *Obesity* (Silver Spring) 2008;16:S33-39.
4. Sheikh AB, Nasrullah A, Haq S, et al. The Interplay of Genetics and Environmental Factors in the Development of Obesity. *Cureus* 2017;9:e1435. doi:10.7759/cureus.1435
5. Andreasen CH, Andersen G. Gene-environment interactions and obesity—further aspects of genomewide association studies. *Nutrition* 2009;25:998-1003.
6. Vimalaswaran KS, Loos RJ. Progress in the genetics of common obesity and type 2 diabetes. *Expert Rev Mol Med* 2010;12:e7. doi:10.1017/S1462399410001389
7. Fawcett KA, Barroso I. The genetics of obesity: FTO leads the way. *Trends Genet* 2010;26:266-274
8. Speliotes EK, Willer CJ, Berndt SI, et al. Association analyses of 249,796 individuals reveal 18 new loci associated with body mass index. *Nat Genet* 2010;42:937-948.
9. Locke AE, Kahali B, Berndt SI, et al., Genetic studies of body mass index yield new insights for obesity biology. *Nature* 2015;518:197-206.
10. Goodarzi MO. Genetics of obesity: what genetic association studies have taught us about the biology of obesity and its complications. *Lancet Diabetes Endocrinol* 2018;6:223-236.
11. Johannsen DL, Ravussin E. The role of mitochondria in health and disease. *Curr Opin Pharmacol.* 2009;9:780-786.
12. Abdul-Ghani MA, DeFronzo RA. Mitochondrial dysfunction, insulin resistance, and type 2 diabetes mellitus. *Curr Diab Rep* 2008;8:173-178.
13. Wang Z, Yuan D, Duan Y, et al. Key factors involved in obesity development. *Eat Weight Disord* 2017. doi: 10.1007/s40519-017-0428-3
14. Szendroedi J, Phielix E, Roden M. The role of mitochondria in insulin resistance and type 2 diabetes mellitus. *Nat Rev Endocrinol* 2011;8:92-103.

15. Fosslien E. Review: Mitochondrial medicine--cardiomyopathy caused by defective oxidative phosphorylation. *Ann Clin Lab Sci* 2003;33:371-395.
16. Rötig A, Munnich A. Genetic features of mitochondrial respiratory chain disorders. *J Am Soc Nephrol* 2003;14:2995-3007.
17. Zhu X, Peng X, Guan MX, et al. Pathogenic mutations of nuclear genes associated with mitochondrial disorders. *Acta Biochim Biophys Sin (Shanghai)* 2009;41:179-187.
18. Rodenburg RJ. Mitochondrial complex I-linked disease. *Biochim Biophys Acta* 2016;1857:938-945.
19. Pospisilik JA, Knauf C, Joza N, et al. Targeted deletion of AIF decreases mitochondrial oxidative phosphorylation and protects from obesity and diabetes. *Cell* 2007;131:476-491.
20. Harper ME, Green K, Brand MD. The efficiency of cellular energy transduction and its implications for obesity. *Annu Rev Nutr* 2008;28:13-33.
21. Bournat JC, Brown CW. Mitochondrial dysfunction in obesity. *Curr Opin Endocrinol Diabetes Obes* 2010;17:446-452.
22. de Mello AH, Costa AB, Engel JDG, Rezin GT. Mitochondrial dysfunction in obesity. *Life Sci* 2018;192:26-32.
23. Dunham-Snary KJ, Ballinger SW. Mitochondrial genetics and obesity: evolutionary adaptation and contemporary disease susceptibility. *Free Radic Biol Med* 2013;65:1229-1237.
24. Kunej T, Wang Z, Michal JJ, et al. Functional UQCRC1 polymorphisms affect promoter activity and body lipid accumulation. *Obesity (Silver Spring)* 2007;15:2896-2901.
25. Jackman MR, Ravussin E, Rowe MJ, et al. Effect of a polymorphism in the ND1 mitochondrial gene on human skeletal muscle mitochondrial function. *Obesity (Silver Spring)* 2008;16:363-368.
26. Mansego ML, Redon J, Marin R, et al. Renin polymorphisms and haplotypes are associated with blood pressure levels and hypertension risk in postmenopausal women. *J Hypertens* 2008;26:230-237.
27. Soriguer-Escofet F, Esteva I, Rojo-Martinez G, et al. Diabetes Group of the Andalusian Society of Endocrinology and Nutrition. Prevalence of latent autoimmune diabetes of adults (LADA) in Southern Spain. *Diabetes Res Clin Pract* 2002;56:213-220.
28. Martínez-Larrad MT, Fernández-Pérez C, González-Sánchez JL, et al., Prevalence of the metabolic syndrome (ATP-III criteria). Population-based study of rural and urban areas in the Spanish province of Segovia. *Med Clin (Barc)* 2005;125(:481-486.
29. Solé X, Guinó E, Valls J, et al. SNPStats: a web tool for the analysis of association studies. *Bioinformatics* 2006;22:1928-1929.

- 1  
2  
3 30. Grimson A, Farh KK, Johnston WK, et al. MicroRNA targeting specificity in mammals:  
4 determinants beyond seed pairing. *Mol Cell* 2007;27:91-105.  
5  
6 31. Friedman RC, Farh KK, Burge CB, et al. Most mammalian mRNAs are conserved targets of  
7 microRNAs. *Genome Res* 2009;19:92-105.  
8  
9 32. Frayling TM, Timpson NJ, Weedon MN, et al., A common variant in the FTO gene is  
10 associated with body mass index and predisposes to childhood and adult obesity. *Science*  
11 2007;316:889-894.  
12  
13 33. Loos RJ, Yeo GS. The bigger picture of FTO: the first GWAS-identified obesity gene. *Nat*  
14 *Rev Endocrinol* 2014;10:51-61.  
15  
16 34. Okura T, Koda M, Ando F, et al. Association of the mitochondrial DNA 15497G/A  
17 polymorphism with obesity in a middle-aged and elderly Japanese population. *Hum Genet*  
18 2003;113:432-436.  
19  
20  
21  
22  
23  
24  
25  
26  
27  
28  
29  
30  
31  
32  
33  
34  
35  
36  
37  
38  
39  
40  
41  
42  
43  
44  
45  
46  
47  
48  
49  
50  
51  
52  
53  
54  
55  
56  
57  
58  
59  
60

## LEGENDS

**Figure 1.** BMI differences found for the associated SNPs genotypes for each population analyzed in this study. Values are expressed as BMI difference means, showing 95% confidence interval. **A)** rs10891319 BMI differences between AG-GG and AA genotypes, taking as reference the first one (BMI difference=0 for carriers of AG-GG genotype). **B)** rs11205591 BMI differences for CC-CG and GG genotypes, with the first one as reference (CC-CG genotype BMI difference=0).

**Figure 2.** Additive effect of rs10891319 and rs11205591 genotypes combination in BMI and obesity risk. **A)** BMI means. \* indicates a p-value < 0.005. **B)** Obesity risk ORs . Rs11205591 CC-CG / rs10891319 AA genotypes were taken as reference (OR=1). The obtained p-value was <0.003. Error bars show standard error. Data are expressed as rs11205591 / rs10891319 genotypes

1  
2  
3  
4  
5  
6  
7  
8  
9  
10  
11  
12  
13  
14  
15  
16  
17  
18  
19  
20  
21  
22  
23  
24  
25  
26  
27  
28  
29  
30  
31  
32  
33  
34  
35  
36  
37  
38  
39  
40  
41  
42  
43  
44  
45  
46

Figure 1

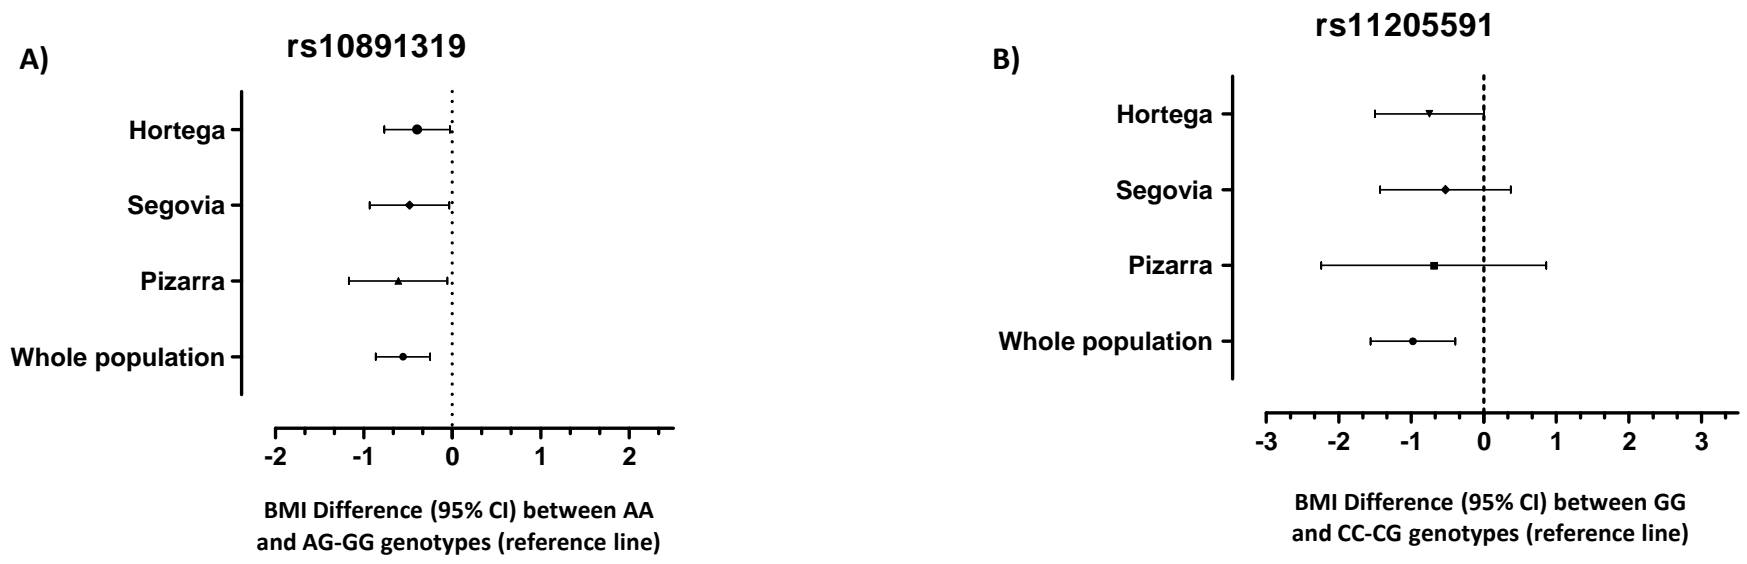

Figure 2.

A)

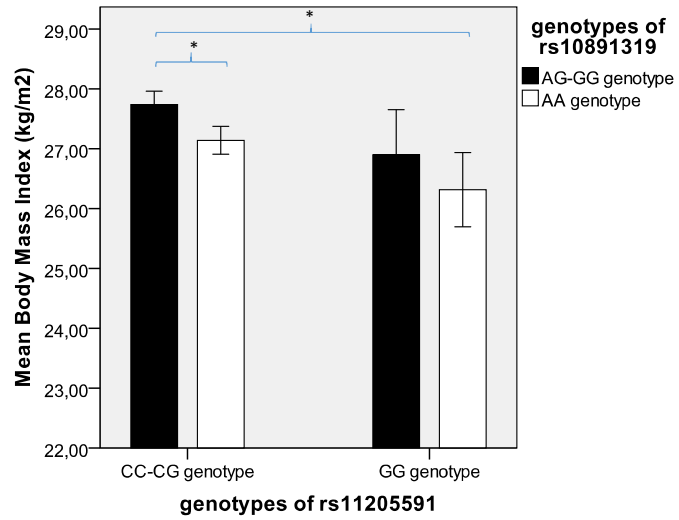

B)

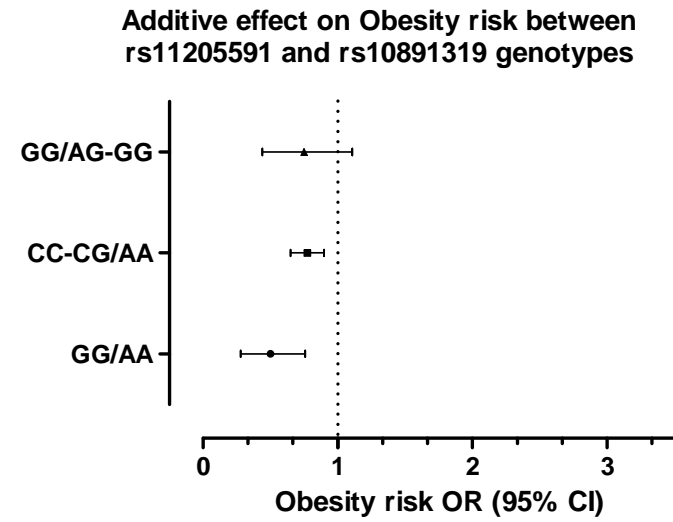



**Table 1S:** Description of selected SNPs

| Gene Name | Chromosome | SNP Name   | chromosome position (GRCh38p10) | Most severe consequence | HGVS Name           | Reference sequence | MAF      | tag SNP |
|-----------|------------|------------|---------------------------------|-------------------------|---------------------|--------------------|----------|---------|
| COX5A     | 15         | rs1133322  | 74920016                        | DOWNSTREAM              | c.*436T>C           | NM_004255.3        | 0.25 (G) | 1**     |
| COX5B     | 2          | rs1470625  | 97649028                        | DOWNSTREAM              | g.97649028C>A       | NC_000012.12       | 0.46 (C) | 2**     |
|           |            | rs17022045 | 97645225                        | UPSTREAM                | c.-862C>G           | NM_001862.2        | 0.13 (G) | 1**     |
| COX6A1    | 12         | rs17431357 | 120442631                       | UPSTREAM                | g.120442631C>T      | NC_000012.12       | 0.04 (T) |         |
|           |            | rs12310837 | 120442769                       | UPSTREAM                | g.120442769A>G      | NC_000012.12       | 0.15 (G) |         |
|           |            | rs2076022  | 120437987                       | UPSTREAM                | c.-140C>T           | NM_004373.3        | 0.49 (T) | 2**     |
| COX6B1    | 19         | rs4806187  | 35658859                        | DOWNSTREAM              | c.*212A>G           | NM_001863.4        | 0.33 (A) | 1**     |
| COX6C     | 8          | rs1130569  | 99887565                        | SYNONYMOUS_CODING       | p.Tyr56=            | NP_004365.1        | 0.25 (A) |         |
|           |            | rs4626565  | 99878314                        | INTRONIC                | c.*16-49A>G         | NM_004374.3        | 0.23 (C) | 1**     |
| COX7A1    | 19         | rs753420   | 36152793                        | 5PRIME_UTR              | c.-386A>C           | NM_001864.3        | 0.40 (G) | 1**     |
|           |            | rs7255180  | 36149417                        | INTRONIC                | c.722-161C>T        | NM_001003962.2     | 0.02 (T) |         |
| COX7A2    | 6          | rs436898   | 75235832                        | DOWNSTREAM              | g.75235832A>C       | NC_000006.12       | 0.16 (A) |         |
|           |            | rs683943   | 75252092                        | UPSTREAM                | g.75252092C>G       | NC_000006.13       | 0.05 (C) |         |
|           |            | rs9360898  | 75243989                        | 5PRIME_UTR              | c.-159A>C           | NM_001865.3        | 0.21 (G) | 3**     |
| COX7B2    | 4          | rs9790574  | 46732884                        | DOWNSTREAM              | g.46732884C>T       | NC_000004.12       | 0.25 (T) |         |
| COX7C     | 5          | rs16902285 | 86621753                        | DOWNSTREAM              | g.86621753T>G       | NC_000005.10       | 0.07 (G) |         |
|           |            | rs13161296 | 86617233                        | UPSTREAM                | c.-823C>T           | NM_001867.2        | 0.01 (T) | 1**     |
|           |            | rs2410718  | 86622655                        | DOWNSTREAM              | g.86622655G>A       | NC_000005.10       | 0.12 (A) |         |
| COX8C     | 14         | rs2089095  | 93350593                        | INTRONIC                | c.-<br>351+17070C>G | NM_020818.4        | 0.11 (G) |         |
| NDUFS1    | 2          | rs1053517  | 206122291                       | DOWNSTREAM              | g.206122291A>G      | NC_000002.12       | 0.49 (G) | 1**     |
|           |            | rs3770989  | 206124027                       | 3PRIME_UTR              | c.*158T>C           | NM_001199981.1     | 0.03 (G) | 3**     |
|           |            | rs11548670 | 206147759                       | SYNONYMOUS_CODING       | p.Asp102=           | NP_001186910.1     | 0.07 (G) | 2**     |

**Table 1S cont:** Description of selected SNPs

| Gene Name | Chromosome | SNP Name   | chromosome position (GRCh38p10) | Most severe consequence            | HGVS Name      | Reference sequence | MAF      | tag SNP     |
|-----------|------------|------------|---------------------------------|------------------------------------|----------------|--------------------|----------|-------------|
| NDUFS2    | 1          | rs4656994  | 161210087                       | INTRONIC                           | c.703-24G>A    | NM_001166159.1     | 0.26 (A) | 3**         |
|           |            | rs1136224  | 161214307                       | 3PRIME_UTR                         | c.*366A>G      | NM_001166159.1     | 0.18 (G) | 6**         |
|           |            | rs1136207  | 161213726                       | SYNONYMOUS_CODING                  | p.Ala430=      | NP_001159631.1     | 0.16 (T) |             |
|           |            | rs4656993  | 161206347                       | INTRONIC                           | c.203-60A>G    | NM_001166159.1     | 0.30 (A) |             |
|           |            | rs11587213 | 161215085                       | UPSTREAM                           | g.161215085A>G | NC_000001.11       | 0.15 (G) | 5**         |
| NDUFS3    | 11         | rs10742816 | 47585432                        | UPSTREAM                           | g.47585432C>T  | NC_000011.10       | 0.25 (C) | 1**         |
| NDUFS4    | 5          | rs31304    | 53646253                        | SYNONYMOUS_CODING                  | p.Gly66=       | NP_001304980.1     | 0.06 (A) |             |
|           |            | rs567      | 53683267                        | 3PRIME_UTR                         | c.*46G>A       | NM_002495.3        | 0.38 (A) | 3**,5**,6** |
|           |            | rs535277   | 53658684                        | INTRONIC                           | c.424+60T>G    | NM_002495.3        | 0.29 (G) |             |
| NDUFS5    | 1          | rs1984600  | 39026255                        | UPSTREAM                           | c.-150G>C      | NM_004552.2        | 0.46 (G) | 1**         |
|           |            | rs11205591 |                                 | DOWNSTREAM                         |                |                    |          | 2**         |
| NDUFS6    | 5          |            | 39035577                        |                                    | g.39035577C>G  | NC_000001.11       | 0.24 (G) |             |
|           |            | rs11953620 | 1818516                         | DOWNSTREAM                         | g.1818516C>T   | NC_000005.10       | 0.42 (T) |             |
|           |            | rs4975851  | 1817222                         | DOWNSTREAM                         | g.1817222C>T   | NC_000005.10       | 0.38 (C) |             |
| NDUFS7    | 19         | rs11666067 | 1389518                         | non coding transcript exon variant | c.228+580C>A   | NM_024407.4        | 0.46 (A) |             |
| SDHB      | 1          | rs1022580  | 17033181                        | INTRONIC                           | c.201-36G>T    | NM_003000.2        | 0.04 (C) | 1**         |
|           |            | rs2647169  | 17044728                        | INTRONIC                           | c.200+33G>A    | NM_003000.2        | 0.11 (T) | 3**         |
|           |            | rs11203280 | 17016288                        | UPSTREAM                           | g.17016288G>T  | NC_000001.11       | 0.50 (G) |             |
|           |            | rs9435739  | 17016429                        | UPSTREAM                           | g.17016429G>A  | NC_000001.11       | 0.48 (A) |             |

**Table 1S cont2:** Description of selected SNPs

| Gene Name | Chromosome | SNP Name   | chromosome position (GRCh38p10) | Most severe consequence | HGVS Name      | Reference sequence | MAF      | tag SNP |
|-----------|------------|------------|---------------------------------|-------------------------|----------------|--------------------|----------|---------|
| SDHC      | 1          | rs4600063  | 161363401                       | 3PRIME_UTR              | g.161363401A>G | NC_000001.11       | 0.17 (G) | 3**     |
|           |            | rs13374037 | 161365491                       | 3PRIME_UTR              | g.161365491T>A | NC_000001.11       | 0.17 (A) |         |
| SDHD      | 11         | rs10891319 | 112096881                       | INTRONIC                | g.112096881A>G | NC_000011.10       | 0.35 (G) |         |
| UQCRB     | 8          | rs10504961 | 96227901                        | 3PRIME_UTR              | g.96227901C>T  | NC_000008.11       | 0.37 (T) |         |
| UQCRQ     | 5          | rs803224   | 132870812                       | UPSTREAM                | g.132870812G>A | NC_000005.10       | 0.18 (G) |         |
|           |            | rs17624157 | 132868339                       | UPSTREAM                | g.132868339G>A | NC_000005.10       | 0.05 (A) |         |
| GDF9      | 5          | rs39830    | 132865726                       | UPSTREAM                | g.132865726G>A | NC_000005.10       | 0.36 (C) | 3**,4** |
|           |            | rs30177    | 132866719                       | 5PRIME_UTR              | g.132866719C>G | NC_000005.10       |          |         |

SNP Name: dbSNP 149, Ensemble release 89. MAF: Minor allele frequency. HGVS name: nomenclature following Human Genome Variation Society guidelines

Table 1. STREGA reporting recommendations, extended from STROBE Statement

| Item                        | Item number | STROBE Guideline                                                                                     | Extension for Genetic Association Studies (STREGA)                                                     | Page # in Manuscript<br>(or N/A if not applicable) |
|-----------------------------|-------------|------------------------------------------------------------------------------------------------------|--------------------------------------------------------------------------------------------------------|----------------------------------------------------|
| <b>Title and Abstract</b>   | 1           | (a) Indicate the study's design with a commonly used term in the title or the abstract.              |                                                                                                        | 1                                                  |
|                             |             | (b) Provide in the abstract an informative and balanced summary of what was done and what was found. |                                                                                                        | 2                                                  |
| <b>Introduction</b>         |             |                                                                                                      |                                                                                                        |                                                    |
| <i>Background rationale</i> | 2           | Explain the scientific background and rationale for the investigation being reported.                |                                                                                                        | 3-4                                                |
| <i>Objectives</i>           | 3           | State specific objectives, including any pre-specified hypotheses.                                   | <b>State if the study is the first report of a genetic association, a replication effort, or both.</b> | 4                                                  |
| <b>Methods</b>              |             |                                                                                                      |                                                                                                        |                                                    |
| <i>Study design</i>         | 4           | Present key elements of study design early in the paper.                                             |                                                                                                        | 5-6                                                |

| Item         | Item number | STROBE Guideline                                                                                                                                                                                                                                                                                                                                                                                                                                                                            | Extension for Genetic Association Studies (STREGA)                                                                                                                 | Page # in Manuscript<br>(or N/A if not applicable) |
|--------------|-------------|---------------------------------------------------------------------------------------------------------------------------------------------------------------------------------------------------------------------------------------------------------------------------------------------------------------------------------------------------------------------------------------------------------------------------------------------------------------------------------------------|--------------------------------------------------------------------------------------------------------------------------------------------------------------------|----------------------------------------------------|
| Setting      | 5           | Describe the setting, locations and relevant dates, including periods of recruitment, exposure, follow-up, and data collection.                                                                                                                                                                                                                                                                                                                                                             |                                                                                                                                                                    | 5                                                  |
| Participants | 6           | <p>(a) <b>Cohort study</b> – Give the eligibility criteria, and the sources and methods of selection of participants. Describe methods of follow-up.</p> <p><b>Case-control study</b> – Give the eligibility criteria, and the sources and methods of case ascertainment and control selection. Give the rationale for the choice of cases and controls.</p> <p><b>Cross-sectional study</b> – Give the eligibility criteria, and the sources and methods of selection of participants.</p> | <b>Give information on the criteria and methods for selection of subsets of participants from a larger study, when relevant.</b>                                   | 5                                                  |
|              |             | <p>(b) <b>Cohort study</b> – For matched studies, give matching criteria and number of exposed and unexposed.</p> <p><b>Case-control study</b> – For matched studies, give matching criteria and the number of controls per case.</p>                                                                                                                                                                                                                                                       |                                                                                                                                                                    | NA                                                 |
| Variables    | 7           | (a) Clearly define all outcomes, exposures, predictors, potential confounders, and effect modifiers. Give diagnostic criteria, if applicable.                                                                                                                                                                                                                                                                                                                                               | <b>(b) Clearly define genetic exposures (genetic variants) using a widely-used nomenclature system. Identify variables likely to be associated with population</b> | 6                                                  |

| Item                            | Item number | STROBE Guideline                                                                                                                                                                                 | Extension for Genetic Association Studies (STREGA)                                                                                                                                                                                                                                                                                                                                                                                                                | Page # in Manuscript<br>(or N/A if not applicable) |
|---------------------------------|-------------|--------------------------------------------------------------------------------------------------------------------------------------------------------------------------------------------------|-------------------------------------------------------------------------------------------------------------------------------------------------------------------------------------------------------------------------------------------------------------------------------------------------------------------------------------------------------------------------------------------------------------------------------------------------------------------|----------------------------------------------------|
|                                 |             |                                                                                                                                                                                                  | <i>stratification (confounding by ethnic origin).</i>                                                                                                                                                                                                                                                                                                                                                                                                             |                                                    |
| <i>Data sources measurement</i> | 8*          | <i>(a)</i> For each variable of interest, give sources of data and details of methods of assessment (measurement). Describe comparability of assessment methods if there is more than one group. | <i>(b) Describe laboratory methods, including source and storage of DNA, genotyping methods and platforms (including the allele calling algorithm used, and its version), error rates and call rates. State the laboratory/centre where genotyping was done. Describe comparability of laboratory methods if there is more than one group. Specify whether genotypes were assigned using all of the data from the study simultaneously or in smaller batches.</i> | 5-6                                                |
| <i>Bias</i>                     | 9           | <i>(a)</i> Describe any efforts to address potential sources of bias.                                                                                                                            | <i>(b) For quantitative outcome variables, specify if any investigation of potential bias resulting</i>                                                                                                                                                                                                                                                                                                                                                           |                                                    |

| Item                          | Item number | STROBE Guideline                                                                                                               | Extension for Genetic Association Studies (STREGA)                                                                                                                      | Page # in Manuscript<br>(or N/A if not applicable) |
|-------------------------------|-------------|--------------------------------------------------------------------------------------------------------------------------------|-------------------------------------------------------------------------------------------------------------------------------------------------------------------------|----------------------------------------------------|
|                               |             |                                                                                                                                | <i>from pharmacotherapy was undertaken. If relevant, describe the nature and magnitude of the potential bias, and explain what approach was used to deal with this.</i> | NA                                                 |
| <i>Study size</i>             | 10          | Explain how the study size was arrived at.                                                                                     |                                                                                                                                                                         | 5                                                  |
| <i>Quantitative variables</i> | 11          | Explain how quantitative variables were handled in the analyses. If applicable, describe which groupings were chosen, and why. | <i>If applicable, describe how effects of treatment were dealt with.</i>                                                                                                | 5-6                                                |
| <i>Statistical methods</i>    | 12          | (a) Describe all statistical methods, including those used to control for confounding.                                         | <i>State software version used and options (or settings) chosen.</i>                                                                                                    | 7                                                  |
|                               |             | (b) Describe any methods used to examine subgroups and interactions.                                                           |                                                                                                                                                                         | 7                                                  |
|                               |             | (c) Explain how missing data were addressed.                                                                                   |                                                                                                                                                                         | 7                                                  |

| Item | Item number | STROBE Guideline                                                                                                                                                                                                                                                                                                               | Extension for Genetic Association Studies (STREGA)                                   | Page # in Manuscript<br>(or N/A if not applicable) |
|------|-------------|--------------------------------------------------------------------------------------------------------------------------------------------------------------------------------------------------------------------------------------------------------------------------------------------------------------------------------|--------------------------------------------------------------------------------------|----------------------------------------------------|
|      |             | <p>(d) <b>Cohort study</b> – If applicable, explain how loss to follow-up was addressed.</p> <p><b>Case-control study</b> – If applicable, explain how matching of cases and controls was addressed.</p> <p><b>Cross-sectional study</b> – If applicable, describe analytical methods taking account of sampling strategy.</p> |                                                                                      | NA                                                 |
|      |             | (e) Describe any sensitivity analyses.                                                                                                                                                                                                                                                                                         |                                                                                      |                                                    |
|      |             |                                                                                                                                                                                                                                                                                                                                | <i>(f) State whether Hardy-Weinberg equilibrium was considered and, if so, how.</i>  | 7                                                  |
|      |             |                                                                                                                                                                                                                                                                                                                                | <i>(g) Describe any methods used for inferring genotypes or haplotypes.</i>          | 7                                                  |
|      |             |                                                                                                                                                                                                                                                                                                                                | <i>(h) Describe any methods used to assess or address population stratification.</i> |                                                    |
|      |             |                                                                                                                                                                                                                                                                                                                                | <i>(i) Describe any methods used to address multiple</i>                             |                                                    |



| Item                    | Item number | STROBE Guideline                                                                                                                                                                                                | Extension for Genetic Association Studies (STREGA)                                                                                  | Page # in Manuscript<br>(or N/A if not applicable) |
|-------------------------|-------------|-----------------------------------------------------------------------------------------------------------------------------------------------------------------------------------------------------------------|-------------------------------------------------------------------------------------------------------------------------------------|----------------------------------------------------|
|                         |             |                                                                                                                                                                                                                 | <i>comparisons or to control risk of false positive findings.</i>                                                                   | 7                                                  |
|                         |             |                                                                                                                                                                                                                 | <i>(j) Describe any methods used to address and correct for relatedness among subjects</i>                                          |                                                    |
| <b>Results</b>          |             |                                                                                                                                                                                                                 |                                                                                                                                     |                                                    |
| <i>Participants</i>     | 13*         | (a) Report the numbers of individuals at each stage of the study – e.g., numbers potentially eligible, examined for eligibility, confirmed eligible, included in the study, completing follow-up, and analysed. | <b>Report numbers of individuals in whom genotyping was attempted and numbers of individuals in whom genotyping was successful.</b> | 5-6                                                |
|                         |             | (b) Give reasons for non-participation at each stage.                                                                                                                                                           |                                                                                                                                     | 5                                                  |
|                         |             | (c) Consider use of a flow diagram.                                                                                                                                                                             |                                                                                                                                     |                                                    |
| <i>Descriptive data</i> | 14*         | (a) Give characteristics of study participants (e.g., demographic, clinical, social) and information on exposures and potential confounders.                                                                    | <b>Consider giving information by genotype.</b>                                                                                     | 5                                                  |

| Item                | Item number | STROBE Guideline                                                                                                                                                                                                 | Extension for Genetic Association Studies (STREGA)                       | Page # in Manuscript<br>(or N/A if not applicable) |
|---------------------|-------------|------------------------------------------------------------------------------------------------------------------------------------------------------------------------------------------------------------------|--------------------------------------------------------------------------|----------------------------------------------------|
|                     |             | (b) Indicate the number of participants with missing data for each variable of interest.                                                                                                                         |                                                                          | 6                                                  |
|                     |             | (c) <b>Cohort study</b> – Summarize follow-up time, e.g. average and total amount.                                                                                                                               |                                                                          | NA                                                 |
| <i>Outcome data</i> | 15 *        | <b>Cohort study</b> —Report numbers of outcome events or summary measures over time.                                                                                                                             | <b>Report outcomes (phenotypes) for each genotype category over time</b> |                                                    |
|                     |             | <b>Case-control study</b> – Report numbers in each exposure category, or summary measures of exposure.                                                                                                           | <b>Report numbers in each genotype category</b>                          |                                                    |
|                     |             | <b>Cross-sectional study</b> – Report numbers of outcome events or summary measures.                                                                                                                             | <b>Report outcomes (phenotypes) for each genotype category</b>           | 10-11                                              |
| <i>Main results</i> | 16          | (a) Give unadjusted estimates and, if applicable, confounder-adjusted estimates and their precision (e.g., 95% confidence intervals). Make clear which confounders were adjusted for and why they were included. |                                                                          | 7                                                  |

| Item                  | Item number | STROBE Guideline                                                                                                  | Extension for Genetic Association Studies (STREGA)                                                                         | Page # in Manuscript (or N/A if not applicable) |
|-----------------------|-------------|-------------------------------------------------------------------------------------------------------------------|----------------------------------------------------------------------------------------------------------------------------|-------------------------------------------------|
|                       |             | (b) Report category boundaries when continuous variables were categorized.                                        |                                                                                                                            | 6                                               |
|                       |             | (c) If relevant, consider translating estimates of relative risk into absolute risk for a meaningful time period. |                                                                                                                            | NA                                              |
|                       |             |                                                                                                                   | <i>(d) Report results of any adjustments for multiple comparisons.</i>                                                     | 10-11                                           |
| <i>Other analyses</i> | 17          | (a) Report other analyses done – e.g., analyses of subgroups and interactions, and sensitivity analyses.          |                                                                                                                            |                                                 |
|                       |             |                                                                                                                   | <i>(b) If numerous genetic exposures (genetic variants) were examined, summarize results from all analyses undertaken.</i> | 10-11                                           |
|                       |             |                                                                                                                   | <i>(c) If detailed results are available elsewhere, state how they can be accessed.</i>                                    | NA                                              |
| <b>Discussion</b>     |             |                                                                                                                   |                                                                                                                            |                                                 |
| <i>Key results</i>    | 18          | Summarize key results with reference to study objectives.                                                         |                                                                                                                            | 14                                              |

| Item                     | Item number | STROBE Guideline                                                                                                                                                            | Extension for Genetic Association Studies (STREGA) | Page # in Manuscript<br>(or N/A if not applicable) |
|--------------------------|-------------|-----------------------------------------------------------------------------------------------------------------------------------------------------------------------------|----------------------------------------------------|----------------------------------------------------|
| <i>Limitations</i>       | 19          | Discuss limitations of the study, taking into account sources of potential bias or imprecision. Discuss both direction and magnitude of any potential bias.                 |                                                    |                                                    |
| <i>Interpretation</i>    | 20          | Give a cautious overall interpretation of results considering objectives, limitations, multiplicity of analyses, results from similar studies, and other relevant evidence. |                                                    |                                                    |
| <i>Generalizability</i>  | 21          | Discuss the generalizability (external validity) of the study results.                                                                                                      |                                                    |                                                    |
| <b>Other Information</b> |             |                                                                                                                                                                             |                                                    |                                                    |
| <i>Funding</i>           | 22          | Give the source of funding and the role of the funders for the present study and, if applicable, for the original study on which the present article is based.              |                                                    |                                                    |

STREGA = STrengthening the REporting of Genetic Association studies; STROBE = STrengthening the Reporting of Observational Studies in Epidemiology.

\* Give information separately for cases and controls in case-control studies and, if applicable, for exposed and unexposed groups in cohort and cross-sectional studies.

# BMJ Open

## RESPIRATORY CHAIN POLYMORPHISMS AND OBESITY IN THE SPANISH POPULATION, A CROSS-SECTIONAL STUDY

|                                 |                                                                                                                                                                                                                                                                                                                                                                                                                                                                                                                                                                                                                                                                                                                                                                                                                                                                                                                                                                                                                                                                                                                                                                                                                                                                                                                                                                                                                                                                                                                                                                                                                                                                                                                                                                                                                                                                                                                           |
|---------------------------------|---------------------------------------------------------------------------------------------------------------------------------------------------------------------------------------------------------------------------------------------------------------------------------------------------------------------------------------------------------------------------------------------------------------------------------------------------------------------------------------------------------------------------------------------------------------------------------------------------------------------------------------------------------------------------------------------------------------------------------------------------------------------------------------------------------------------------------------------------------------------------------------------------------------------------------------------------------------------------------------------------------------------------------------------------------------------------------------------------------------------------------------------------------------------------------------------------------------------------------------------------------------------------------------------------------------------------------------------------------------------------------------------------------------------------------------------------------------------------------------------------------------------------------------------------------------------------------------------------------------------------------------------------------------------------------------------------------------------------------------------------------------------------------------------------------------------------------------------------------------------------------------------------------------------------|
| Journal:                        | <i>BMJ Open</i>                                                                                                                                                                                                                                                                                                                                                                                                                                                                                                                                                                                                                                                                                                                                                                                                                                                                                                                                                                                                                                                                                                                                                                                                                                                                                                                                                                                                                                                                                                                                                                                                                                                                                                                                                                                                                                                                                                           |
| Manuscript ID                   | bmjopen-2018-027004.R1                                                                                                                                                                                                                                                                                                                                                                                                                                                                                                                                                                                                                                                                                                                                                                                                                                                                                                                                                                                                                                                                                                                                                                                                                                                                                                                                                                                                                                                                                                                                                                                                                                                                                                                                                                                                                                                                                                    |
| Article Type:                   | Research                                                                                                                                                                                                                                                                                                                                                                                                                                                                                                                                                                                                                                                                                                                                                                                                                                                                                                                                                                                                                                                                                                                                                                                                                                                                                                                                                                                                                                                                                                                                                                                                                                                                                                                                                                                                                                                                                                                  |
| Date Submitted by the Author:   | 21-Nov-2018                                                                                                                                                                                                                                                                                                                                                                                                                                                                                                                                                                                                                                                                                                                                                                                                                                                                                                                                                                                                                                                                                                                                                                                                                                                                                                                                                                                                                                                                                                                                                                                                                                                                                                                                                                                                                                                                                                               |
| Complete List of Authors:       | <p>de marco, griselda; Research Foundation of Valencia University Clinic Hospital-INCLIVA, Genomic and Genetic Diagnosis Unit<br/> Garcia-Garcia, Ana Barbara; CIBER of Diabetes and Associated Metabolic Diseases (CIBERDEM); Research Foundation of Valencia University Clinic Hospital-INCLIVA<br/> Real, Jose; University Clinical Hospital and INCLIVA, Service of Endocrinology and Nutrition; CIBER of Diabetes and Associated Metabolic Diseases (CIBERDEM)<br/> Gonzalez-Albert, Veronica; Research Foundation of Valencia University Clinic Hospital-INCLIVA, Genomic and Genetic Diagnosis Unit<br/> Briongos-Figuero, Laisa; Rio Hortega University Hospital, Internal Medicine Service<br/> Cobos-Siles, Marta; Rio Hortega University Hospital, Internal Medicine Service<br/> Lago-Sampedro, Ana; IBIMA.Regional University Hospital of Malaga, UMA,, Endocrinology and Nutrition Department; CIBER of Diabetes and Associated Metabolic Diseases (CIBERDEM)<br/> Corbaton, Arturo; Biomedical Research Foundation. University Hospital Clínico San Carlos, Diabetes Research Laboratory; CIBER of Diabetes and Associated Metabolic Diseases (CIBERDEM)<br/> Teresa Martinez-Larrad, Maria; Biomedical Research Foundation. University Hospital Clínico San Carlos, Diabetes Research Laboratory; CIBER of Diabetes and Associated Metabolic Diseases (CIBERDEM)<br/> Carmena, Rafael; University of Valencia, Department of Medicine<br/> Martin-Escudero, Juan; Rio Hortega University Hospital, Internal Medicine Service<br/> Rojo, Gemma; IBIMA.Regional University Hospital of Malaga, UMA,, Endocrinology and Nutrition Department; CIBER of Diabetes and Associated Metabolic Diseases (CIBERDEM)<br/> Chaves, Felipe; Research Foundation of Valencia University Clinic Hospital-INCLIVA, Genomic and Genetic Diagnosis Unit; CIBER of Diabetes and Associated Metabolic Diseases (CIBERDEM)</p> |
| <b>Primary Subject Heading</b>: | Genetics and genomics                                                                                                                                                                                                                                                                                                                                                                                                                                                                                                                                                                                                                                                                                                                                                                                                                                                                                                                                                                                                                                                                                                                                                                                                                                                                                                                                                                                                                                                                                                                                                                                                                                                                                                                                                                                                                                                                                                     |
| Secondary Subject Heading:      | Diabetes and endocrinology                                                                                                                                                                                                                                                                                                                                                                                                                                                                                                                                                                                                                                                                                                                                                                                                                                                                                                                                                                                                                                                                                                                                                                                                                                                                                                                                                                                                                                                                                                                                                                                                                                                                                                                                                                                                                                                                                                |
| Keywords:                       | Obesity, SNP, mitochondrial respiratory chain                                                                                                                                                                                                                                                                                                                                                                                                                                                                                                                                                                                                                                                                                                                                                                                                                                                                                                                                                                                                                                                                                                                                                                                                                                                                                                                                                                                                                                                                                                                                                                                                                                                                                                                                                                                                                                                                             |
|                                 |                                                                                                                                                                                                                                                                                                                                                                                                                                                                                                                                                                                                                                                                                                                                                                                                                                                                                                                                                                                                                                                                                                                                                                                                                                                                                                                                                                                                                                                                                                                                                                                                                                                                                                                                                                                                                                                                                                                           |

1  
2  
3  
4  
5  
6  
7  
8  
9  
10  
11  
12  
13  
14  
15  
16  
17  
18  
19  
20  
21  
22  
23  
24  
25  
26  
27  
28  
29  
30  
31  
32  
33  
34  
35  
36  
37  
38  
39  
40  
41  
42  
43  
44  
45  
46  
47  
48  
49  
50  
51  
52  
53  
54  
55  
56  
57  
58  
59  
60

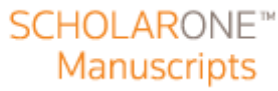

## RESPIRATORY CHAIN POLYMORPHISMS AND OBESITY IN THE SPANISH POPULATION, A CROSS-SECTIONAL STUDY

Griselda De Marco<sup>1</sup>, Ana Barbara García-García<sup>1, 2</sup>, Jose Tomas Real<sup>2,3,4</sup>, Veronica Gonzalez-Albert <sup>1</sup>, Laisa-Socorro Briongos-Figuero<sup>5</sup>, Marta Cobos-Siles<sup>5</sup>, Ana Lago-Sampedro <sup>2,6</sup>, Arturo Corbaton<sup>2,7</sup>, Maria T. Martinez-Larrad<sup>2,7</sup>, Rafael Carmena<sup>4</sup>, Juan Carlos Martín Escudero<sup>5</sup>, Gemma Rojo-Martínez<sup>2,6</sup>, Felipe Javier Chaves<sup>1,2</sup>.

<sup>1</sup> Genomic and Genetic Diagnosis Unit. Research Foundation of Valencia University Clinical Hospital-INCLIVA. Valencia, Spain.

<sup>2</sup> CIBER of Diabetes and Associated Metabolic Diseases (CIBERDEM), Madrid. Spain.

<sup>3</sup> Endocrinology and Nutrition Service, University Clinical Hospital and INCLIVA, Valencia, Spain.

<sup>4</sup> Department of Medicine, University of Valencia, Valencia, Spain

<sup>5</sup> Internal Medicine Service. Rio Hortega University Hospital. Valladolid, Spain

<sup>6</sup> Endocrinology and Nutrition Department. IBIMA.Regional University Hospital of Malaga, UMA, Malaga, Spain

<sup>7</sup> Diabetes Research Laboratory. Biomedical Research Foundation. University Clinical Hospital San Carlos. Madrid Spain.

Corresponding author: Ana-Barbara Garcia-Garcia.

E-mail: [a.barbara.garcia@ext.uv.es](mailto:a.barbara.garcia@ext.uv.es). Current address: Menendez Pelayo 4acc, Valencia 46010.

Tel: 0034-963864100 ext 83916

Word count: excluding title page, abstract, references figures and tables: 2433

**ABSTRACT**

**OBJECTIVE:** To study the association of genes involved in the Mitochondrial Respiratory Chain (MRC) pathway with Body Mass Index (BMI) and obesity risk.

**DESIGN:** This work studies three cross-sectional populations from Spain, representing three provinces: HORTEGA (Valladolid, Northwest/Center), SEGOVIA (Segovia, Northwest/center), and PIZARRA (Malaga, South).

**SETTING:** Forty-eight SNPs from MRC genes were selected and genotyped by SNPlex method. Association studies with BMI and obesity risk were performed for each population. These associations were then verified by analysis of the studied population as a whole (3731 samples).

**PARTICIPANTS:** a total of 3731 Caucasian individuals: 1502 samples from HORTEGA, 988 from PIZARRA and 1241 from SEGOVIA.

**RESULTS:** rs4600063 (*SDHC*), rs11205591 (*NDUFS5*) and rs10891319 (*SDHD*) SNPs were associated with BMI and obesity risk (p values for BMI were 0.04, 0.0011 and 0.0004, respectively, and for obesity risk, 0.0072, 0.039 and 0.0038). However, associations between rs4600063 and BMI, and between these 3 SNPs and obesity risk are not significant if Bonferroni correction is considered. In addition, rs11205591 and rs10891319 polymorphisms showed an additive interaction with BMI and obesity risk.

**CONCLUSIONS:** Several polymorphisms from genes coding MRC proteins may be involved in BMI variability and could be related to the risk to become obese in the Spanish general population.

**KEYWORDS:** Obesity, SNP, mitochondrial respiratory chain,



## STRENGTHS AND LIMITATIONS OF THIS STUDY:

- This research was conducted in three open populations from different provinces of Spain.
- MRC SNP analysis by SNPlex genotyping method overcomes some of the limitations of GWAS.
- One of the limitations of this study is the reduced size of the populations used
- Despite the limited number of individuals in this study, the statistical power is sufficient for the number of analyzed SNPs.
- Results from this study are promising and should be validated by larger sample sizes

## INTRODUCTION

Obesity is a metabolic disorder consisting of excess body fat accumulation. Obesity prevalence has been increasing during the last decades in Western Societies, becoming one of the most important public health problems due to its causally relationship with several chronic diseases such as insulin resistance (IR), cardiovascular disease (CVD) and type 2 diabetes mellitus (T2DM).[1]

Susceptibility to obesity is determined by environmental and genetic factors. Although rising obesity prevalence is triggered by lifestyle changes, the risk of developing obesity has an important genetic component, which has been examined in numerous studies.[2-4] Rare mutations in genes encoding for appetite-regulating proteins, such as leptin (*LEP*) and its receptor (*LEPR*), melanocortin-4 receptor (*MC4R*) and pro-opiomelanocortin (*POMC*), have shown to cause severe early-onset obesity.[5-6] Genome wide association studies (GWAS) have identified common polymorphisms located in, or near to, 97 loci, mostly expressed in the central nervous system.[6-

1  
2 10] However, it is also suggested that, due to limitations of GWAS, there are around 250 common  
3  
4 variants with a similar effect to those previously described that remain to be identified.[8]  
5

6  
7 The study of target genes or genes involved in a particular physiological pathway is a  
8  
9 potential approach to identify genetic variants with roles in complex traits. The mitochondrial  
10  
11 respiratory chain (MRC) is a biological system involved in carbohydrate and lipid metabolism  
12  
13 through oxidative phosphorylation. MRC produces the proton gradient needed for ATP synthesis  
14  
15 and is composed of four large complexes (I to IV) that transport electrons from donors (NADH at  
16  
17 complex I, FADH<sub>2</sub> at complex II) to acceptors. Finally, electrons in complex IV are conducted to  
18  
19 the last acceptor, the molecular oxygen. [11] Mitochondrial oxidative capacity dysfunction in  
20  
21 liver, muscle or adipose tissue could contribute to the intracellular accumulation of fatty acids  
22  
23 observed in obesity.[12-13] Insulin resistance has been associated with lower mitochondria  
24  
25 activity at rest.[14] This may be the result of inherited defects in genes coding MRC proteins.  
26  
27

28  
29 Mutations of MRC genes resulting in loss of function have been reported to produce major  
30  
31 disability-causing diseases.[15-18] In addition, studies on their impact on energy efficiency and  
32  
33 expenditure have shown an association with the risk of developing obesity.[12, 19-21] Studies  
34  
35 have also shown that obesity affects the function of mitochondria, leading to mitochondrial  
36  
37 dysfunction.[22] Mitochondrial dynamics play a role in metabolism and obesity: *MFN2*, a gene  
38  
39 coding for a GTPase in the outer mitochondrial membrane is involved in mitochondrial fusion,  
40  
41 regulating the operation of the mitochondrial network in skeletal muscle. When *MFN2* is  
42  
43 repressed, glucose oxidation and mitochondrial membrane potential are impaired.[23] It has been  
44  
45 shown that expression of *MNF2* is repressed in obese patients compared to lean.[23] Furthermore,  
46  
47 polymorphisms in MRC genes, or others related to its regulation, have been related to obesity in  
48  
49 different populations.[23-25]  
50  
51  
52  
53  
54  
55  
56  
57  
58  
59  
60

1  
2 The aim of this study was to find associations between MRC nuclear genes, BMI and  
3  
4 obesity in three different Spanish studies in the general population.  
5  
6  
7  
8  
9  
10  
11  
12

## 13 **MATERIALS AND METHODS**

### 14 15 16 17 18 **Sample Populations**

19  
20 We independently analyzed three general Spanish populations originally recruited for the  
21 study of cardiovascular risk factors and cardiovascular disease development: HORTEGA (1502  
22 subjects collected from 2004 to 2005), PIZARRA (988 individuals, collected from 2009 and 2010)  
23 and SEGOVIA (1239 subjects, collected between 2000 and 2003). [26-28] The HORTEGA  
24 sample involves subjects from the Valladolid area (North-western Spain). The PIZARRA sample  
25 comprises subjects from Pizarra, a town in the Malaga province (Andalusia, Southern Spain). The  
26 SEGOVIA sample studied subjects from the Segovia Province (Center of Spain). These three  
27 populations were recruited to identify cardiovascular risk factors in the general population as an  
28 overall goal. Individuals were randomly selected and invited to participate. Exclusion criteria were  
29 any concomitant disease or condition that prevented them from answering a survey, or donating a  
30 sample or that would influence the collection of reliable information. The study was approved by  
31 the Research and Ethics Committee from the Valencia University Clinical Hospital and INCLIVA  
32 (reference number 2010/013). All patients provided informed written consent to take part in the  
33 investigations. The research was carried out according to the Ethical Principles of the World  
34 Medical Association (Declaration of Helsinki)  
35  
36  
37  
38  
39  
40  
41  
42  
43  
44  
45  
46  
47  
48  
49  
50  
51  
52  
53

54 Demographic data and anthropometric parameters were collected following standard  
55  
56  
57  
58  
59  
60

1  
2 procedures. Presence of obesity, hypertension (HTN) and Type 2 Diabetes mellitus (T2DM) was  
3  
4 recorded. BMI was calculated by dividing weight in kilograms by height in meters squared.  
5  
6 Obesity, HTN and T2DM were defined using the World Health Organization (WHO) criteria  
7  
8 (<http://www.who.int>). Briefly, obesity was diagnosed with a BMI  $>30$  kg/m<sup>2</sup>, overweight as BMI  
9  
10 between 25.0 and 29.9 kg/m<sup>2</sup>, and normal weight as BMI  $\leq 24.9$  kg/m<sup>2</sup>. HTN was defined by  
11  
12 systolic and diastolic blood pressure above 140 or 90 mm Hg, respectively. T2DM was defined by  
13  
14 fasting plasma glucose  $\geq 126$ mg/dl or 2-hour plasma glucose  $\geq 200$ mg/dl. Previous diagnosis of  
15  
16 T2DM or HTN and detection of the disease at the moment of sample collection were recorded.  
17  
18 Missing data for parameters regarding this work (expressed as HORTEGA missing data /  
19  
20 PIZARRA missing data / SEGOVIA missing data) were 58/58/6 for BMI and 1/85/63 for glucose.  
21  
22  
23  
24

25 We have calculated the statistical power for our three samples independently (minor  
26  
27 allele frequency (MAF)  $>0.10$ , genotype relative risk (1.5)), number of obese and non-obese and  
28  
29 prevalence of obesity in each of the populations. Furthermore, the statistical power was over 85%  
30  
31 for this conditions in all populations and it increases for increased allele frequency  
32  
33 ([http://csg.sph.umich.edu/abecasis/cats/gas\\_power\\_calculator/index.html](http://csg.sph.umich.edu/abecasis/cats/gas_power_calculator/index.html)).  
34  
35  
36  
37  
38  
39  
40

## 41 **Genotyping methods**

42  
43 Gene and SNP selection:

44  
45 Forty-eight single nucleotide polymorphisms (SNPs) of chromosomal genes coding for  
46  
47 MRC proteins were selected for genotyping. Selection was performed based on the following  
48  
49 considerations: functionality (previously described or possible effect), MAF  $\geq 1\%$ , representation  
50  
51 of genetic variability of the whole gene (HapMap polymorphisms), and spacing along the gene.  
52  
53 Most important variants described in the literature were included. Details of genes and SNPs  
54  
55  
56  
57  
58  
59  
60

1 included are shown as supplemental material (Table 1S).

## 6 Genotyping procedure:

9 Venous blood samples were collected in tubes containing EDTA. DNA was isolated by  
10 standard commercial procedures (Chemagic Magnetic Separator from Chemagen, Baesweiler,  
11 Germany). DNA was quantified and diluted to a final concentration of 100 ng/ul.

15 SNPlex (Applied Biosystems, Foster City, California, USA) was used for genotyping,  
16 following the manufacturer's guidelines. SNPlex is a genotyping system based on oligonucleotide  
17 ligation assay/polymerase chain reaction technology that analyzes 48 SNPs. Those SNPs were  
18 chosen as explained above.

## 27 Statistical analysis

29 Statistical analyses were performed using SPSS version 19 and SNPStats software. [29]

32 Chi-squared test and variance analysis were used to compare quantitative and categorical  
33 variables between groups in order to assess general characteristics of the studied populations. P-  
34 values  $\leq 0.05$  were considered significant.

39 When analyzing for associations between SNPs and obesity traits in the three populations,  
40 11 out of the 48 SNPs were excluded from the study because they did not fulfill the Hardy-  
41 Weimberg equilibrium, had low frequency, or were not detectable by the genotyping procedure.  
42 Hardy-Weimberg test indicated no loss of heterozigosity in the analyzed populations for these  
43 SNPs. The Bonferroni correction cut off to assess significant associations was calculated for the  
44 37 remaining SNPs. Those polymorphisms associated in at least one of the three populations and  
45 showing the same tendency in the remaining ones, or results with p-values near the nominal cut  
46 off point in the three studies ( $p < 0.05$ ), were also analyzed in the 3729 total combined subjects from  
47  
48  
49  
50  
51  
52  
53  
54  
55  
56  
57  
58  
59  
60

1  
2 the three populations. For these analyses, multivariate logistic regression under co-dominant model  
3  
4 was performed and, if applicable, dominant, recessive, or additive models were used. For  
5  
6 categorical variables, adjusted odds ratios were assessed with 95% confidence interval. The  
7  
8 association between polymorphisms and BMI values was examined using analysis of covariance  
9  
10 (ANCOVA). All p-values were two-sided. All results were obtained after adjustment for age and  
11  
12 gender, and p-values <0.05 were considered significant.  
13  
14  
15  
16  
17

### 18 **Patient and Public involvement**

19  
20 Patients and public were not actively involved in this research. They were informed  
21  
22 regarding the research goals, protocol development and parameters to be measured before starting  
23  
24 the study. If appropriate, they were informed regarding results.  
25  
26  
27  
28  
29  
30  
31

## 32 **RESULTS**

### 33 34 35 36 **Characteristics of the studied populations**

37  
38 General characteristics of the studied populations are summarized in Table 1. Age, gender  
39  
40 and BMI varied between the three populations. There were differences in obesity and T2DM  
41  
42 percentage: obesity prevalence was 17%, 26% and 33% for Horteiga, Segovia and Pizarra studies,  
43  
44 respectively, while T2DM prevalence was 7.6%, 10.2% and 19.6%  
45  
46  
47  
48  
49  
50  
51  
52  
53  
54  
55  
56  
57  
58  
59  
60

**Table 1:** General features of Hortega, Pizarra and Segovia patients considered individually and as a whole population

|                               | Hortega                | Pizarra                   | Segovia                  | Whole Population         |
|-------------------------------|------------------------|---------------------------|--------------------------|--------------------------|
| <b>N</b>                      | 1502                   | 988                       | 1241                     | 3731                     |
| <b>Age (Years)</b>            | 54.4 ± 19.3*           | 46.1 ± 13.9***            | 51.9 ± 10.8**            | 51.4 ± 15.9              |
| <b>Height (m)</b>             | 163.7 ± 10.0*          | 161 ± 8.8                 | 161.4 ± 9.0**            | 162.2 ± 9.4              |
| <b>Weight (Kg)</b>            | 70.8 ± 12.9*           | 74.1 ± 4.3***             | 72.1 ± 12.4**            | 72.1 ± 13.2              |
| <b>BMI (Kg/m<sup>2</sup>)</b> | 26.4 ± 4.2*            | 28.6 ± 5.3***             | 27.7 ± 4.3**             | 27.4 ± 4.6               |
| <b>Gender M(%) / F(%)</b>     | 754(50.2) / 748(49.8)* | 365(36.9) / (616(62.3)*** | 562(45.3) / (679(54.7)** | 2043(54.8) / (1681(45.1) |
| <b>Obesity (N(%))</b>         | 262(17.4)*             | 331(33.5)***              | 319(25.7)**              | 912(24.4)                |

M: Male. F: Female. Values expressed as mean ± SD except for gender and obesity. p value <0.05 was considered significant. \*for p<0.05 when comparing Hortega with Pizarra, \*\* p<0.05 when comparing Hortega and Segovia, \*\*\* for p<0.05 when comparing Pizarra and Segovia

### Association between MRC genes SNPs and obesity

We performed the analysis looking for associations between SNPs, BMI and obesity risk in the three independent populations. Table 2 shows results for SNPs with differences in at least one of the three populations and a similar trend in the remaining ones, or that had p-values near the nominal cut-off point ( $p \leq 0.05$ ) in the three studies: rs1136224 (*NDUFS2* gene), rs11205591 (*NDUFS5*), rs4600063 (*SDHC*), rs3770989 (*NDUFS1*) and rs10891319 (*SDHD*). These five SNPs were selected for further analysis in the whole population.

**Table 2:** BMI and obesity risk of associated SNPs for Hortegea, Pizarra and Segovia populations.

|                   | Geno-<br>type | HORTEGA |                             |                          | PIZARRA |                             |                          | SEGOVIA |                             |                       |
|-------------------|---------------|---------|-----------------------------|--------------------------|---------|-----------------------------|--------------------------|---------|-----------------------------|-----------------------|
|                   |               | N       | BMI<br>(Kg/m <sup>2</sup> ) | Obesity<br>OR<br>(95%CI) | N       | BMI<br>(Kg/m <sup>2</sup> ) | Obesity<br>OR<br>(95%CI) | N       | BMI<br>(Kg/m <sup>2</sup> ) | Obesity OR<br>(95%CI) |
| <i>SDHC</i>       | AA            | 1250    | 26.46±0.12                  | 1                        | 772     | 28.70±0.19                  | 1                        | 943     | 27.71±0.10                  | 1                     |
| <b>rs4600063</b>  | AG-GG         | 183     | 26.16±0.30                  | 0.82<br>(0.55-1.22)      | 96      | 27.86±.04                   | 0.47<br>(0.28-0.78)      | 132     | 27.21±0.30                  | 0.88<br>(0.57-1.36)   |
| <b>HWE:1</b>      | p-value       |         | 0.9                         | 0.33                     |         | 0.071                       | <b>0.0025</b>            |         | 0.22                        | 0.57                  |
| <i>NDUFS1</i>     | TT            | 1308    | 26.41±0.12                  | 1                        | 799     | 28.49±0.10                  | 1                        | 1028    | 27.56±0.10                  | 1                     |
| <b>rs3770989</b>  | CT-CC         | 114     | 26.62±0.44                  | 1.13<br>(0.72-1.77)      | 77      | 29.85±0.60                  | 1.5<br>(0.91-2.48)       | 65      | 27.92±0.60                  | 1.28<br>(0.73-2.23)   |
| <b>HWE:1</b>      | p-value       |         | 0.34                        | 0.6                      |         | <b>0.016</b>                | 0.12                     |         | 0.48                        | 0.39                  |
| <i>NDUFS2</i>     | AA            | 1045    | 26.37±0.13                  | 1                        | 640     | 28.61±0.21                  | 1                        | 830     | 27.55±0.15                  | 1                     |
| <b>rs1136224</b>  | AG-GG         | 369     | 26.59±0.23                  | 1.43<br>(1.09-1.89)      | 223     | 28.59±0.34                  | 1.10<br>(0.79-1.54)      | 241     | 27.77±0.26                  | 1.07<br>(0.76-1.48)   |
| <b>HWE:0.36</b>   | p-value       |         | 0.25                        | <b>0.011</b>             |         | 0.71                        | 0.58                     |         | 0.42                        | 0.71                  |
| <i>NDUFS5</i>     | CC-CG         | 1309    | 26.47±0.12                  | 1                        | 832     | 28.63±0.10                  | 1                        | 947     | 27.6±0.14                   | 1                     |
| <b>rs11205591</b> | GG            | 115     | 25.78±0.31                  | 0.67<br>(0.41-1.10)      | 38      | 27.66±0.70                  | 0.86<br>(0.41-1.81)      | 89      | 27.21±0.40                  | 0.89<br>(0.53-1.5)    |
| <b>HWE:0.76</b>   | p-value       |         | <b>0.049</b>                | 0.11                     |         | 0.38                        | 0.69                     |         | 0.25                        | 0.66                  |
| <i>SDHD</i>       | AA            | 691     | 26.16±0.16                  | 1                        | 401     | 28.18±0.26                  | 1                        | 571     | 27.37±0.17                  | 1                     |
| <b>rs10891319</b> | AG-GG         | 726     | 26.64±0.16                  | 1.16<br>(0.90-1.49)      | 478     | 29.00±0.24                  | 1.22<br>(0.91-1.64)      | 492     | 27.83±0.19                  | 1.27<br>(0.96-1.68)   |
| <b>HWE:0.22</b>   | p-value       |         | 0.08                        | 0.25                     |         | 0.084                       | 0.18                     |         | 0.077                       | 0.095                 |

BMI: mean ± SD. OR: odds ratio; 95%CI: 95% confidence interval. HWE: Hardy Weinberg Equilibrium. N: Number of individuals. Bold: significant

Analyzing these five SNPS in the total population, four polymorphisms were associated with BMI: rs4600063, rs10891319, rs3770989, rs11205591, located in the *SDHC*, *SDHD*, *NDUFS1* and *NDUFS5*, genes respectively. Results for these four SNPs are shown in Table 3: rs4600063 and rs3770989 showed low association with BMI, which lost significance after Bonferroni correction ( $p < 0.0013$ ). Rs10891319 and rs11205591 showed significant association with BMI after Bonferroni correction, with a p-value of 0.0004 for the first one and 0.0011 for the



second one. On the other hand, rs4600063 (genotypes AG and GG) and rs11205591 (GG genotype) reduced obesity risk, while rs10891319 (AG and GG genotypes) and rs1136224 (AG and GG genotypes) increased the risk ( $p < 0.05$ ), but they did not reach the Bonferroni cut-off point.

**Table 3:** SNP Genotyping: distribution of BMI levels and the associated obesity risk for all genotypes in whole population.

| Gene/SNP           | Genotype | N           | BMI (Kg/m <sup>2</sup> ) | Non Obesity (N(%)) | Obesity (N(%)) | OR (95% CI)         |
|--------------------|----------|-------------|--------------------------|--------------------|----------------|---------------------|
| <i>SDHC</i>        | AA       | 2965        | 27.44±0.08               | 2109(86.9)         | 851(90.4)      | 1                   |
| <b>rs4600063</b>   | AG-GG    | 411         | 26.89±0.21               | 318(13.1)          | 90(9.6)        | 0.72<br>(0.56-0.92) |
|                    | p-value  |             | <b>0.04</b>              |                    |                | <b>0.0072</b>       |
| <i>SDHD</i>        | AA       | 1663        | 27.06±0.11               | 1243(51.3)         | 422(45.4)      | 1                   |
| <b>rs10891319</b>  | AG-GG    | 1696        | 27.60±0.11               | 1178(48.7)         | 508(54.6)      | 1.25<br>(1.08-1.46) |
|                    | p-value  |             | <b>0.0004</b>            |                    |                | <b>0.0038</b>       |
| <i>NDUFS1</i>      | TT       | 3135        | 27.32±0.08               | 2273(92.9)         | 857(91.2)      | 1                   |
| <b>rs3770989</b>   | CT-CC    | 256         | 27.92±0.32               | 173(7.1)           | 83(8.8)        | 1.30<br>(0.99-1.72) |
|                    | p-value  |             | <b>0.026</b>             |                    |                | 0.066               |
| <i>NDUFS2</i>      | AA       | 2515        | 27.33±0.09               | 1833(76.1)         | 680(73)        | 1                   |
| <b>rs1136224</b>   | AG-GG    | 833         | 27.46±0.16               | 575(23.9)          | 251(27)        | 1.20(1.01-1.43)     |
|                    | p-value  |             | 0.31                     |                    |                | <b>0.041</b>        |
| <i>NDUFS5</i>      | CC-CG    | <b>3088</b> | 27.40±0.08               | 2219(92.3)         | 863(94)        | 1                   |
| <b>rs11205591*</b> | GG       | <b>242</b>  | 26.60±0.24               | 184(7.7)           | 55(6)          | 0.72<br>(0.52-0.99) |
|                    | p-value  |             | <b>0.0011</b>            |                    |                | <b>0.039</b>        |

OR: odds ratio; 95%CI: 95% confidence interval. BMI values are expressed as mean ± standard deviation. Results after adjustment for the following variables included in the model: age and gender. N: Number of individuals. \*tag-SNP.

1  
2 Figure 1 shows BMI differences for rs10891319 and rs11205591 polymorphisms in each  
3 independent population and as a whole. A similar trend can be observed in both figures 1A and  
4  
5  
6 1B, although only the rs11205591 SNP reaches significance in the HORTEGA study ( $p \leq 0.05$ ).  
7  
8  
9

10  
11 We studied additive effects for all these SNPs and an additive effect for rs11205591 and  
12 rs10891319 SNPs was found in the whole sample: patients carrying GG/AA combination  
13 presented significant lower BMI (Figure 2A) and lower obesity risk (Figure 2B) than patients  
14 carrying CC-CG / AG-GG genotypes (data are expressed as rs11205591 genotype / rs10891319  
15 genotype).  
16  
17  
18  
19  
20  
21

22 On the other hand, some of the SNPs were within the gene. We calculated possible  
23 haplotypes, with negative results.  
24  
25  
26  
27  
28  
29  
30  
31

## 32 DISCUSSION

33  
34  
35

36 The goal of this population-based study was to analyze MRC SNPs and their association with BMI  
37 and obesity risk in three Spanish populations. SNPs with the most relevant associations were tested  
38 in the pooled sample.  
39  
40  
41  
42

43 We found a significant protective association with the risk of obesity for rs10891319 AA,  
44 and for patients with the rs11205591 GG genotype, who also showed reduced BMI. Despite  
45 differences in age, sex, BMI, and obesity prevalence between the three samples, a similar trend  
46 was found considering them individually, while rs10891319 showed the strongest in the whole  
47 sample. Furthermore, an additive interaction was observed between these two SNPs, with a  
48 maximal BMI difference of 1.4 kg/m<sup>2</sup> found between genotypes (CC-GG / AA-GG vs GG / AA  
49  
50  
51  
52  
53  
54  
55  
56  
57  
58  
59  
60

1 carriers, expressed as rs11205591/ rs10891319 genotype carriers). In agreement with these  
2 findings, significant differences in obesity risk were also found.  
3  
4  
5

6 Another SNP associated with BMI in one of the three populations and in the whole group,  
7 rs3770989, is located in the 3'UTR region of the *NDUFS1* gene, which codes for NADH  
8 dehydrogenase (ubiquinone) Fe-S protein 1. In silico analysis in TargetScanHuman  
9 ([http://www.targetscan.org/vert\\_50/](http://www.targetscan.org/vert_50/)) showed that this SNP is located between two regions of  
10 miRNA binding sites, although it does not seem to affect either of them.[30,31] On the other hand,  
11 the rs11205591 and rs10891319 SNPs are located in 3' regions of *NDUFS5* and *SDHD* genes  
12 respectively. Although these SNPs have an unknown functional effect, they could be in linkage  
13 disequilibrium with other truly functional polymorphisms. New studies are needed to address this  
14 question.  
15  
16  
17  
18  
19  
20  
21  
22  
23  
24  
25  
26

27 The first gene consistently identified as an obesity gene using GWAS was FTO. Several  
28 SNPs located on its first intron were associated with BMI in European, East Asian and African  
29 populations. [32,33] Following this gene, 75 additional obesity loci have been identified using this  
30 methodology and, although FTO is the gene accounting for most of the inter-individual variability  
31 on BMI, it only explains a 0.34%.[8,33] There are data supporting that alterations in genes related  
32 to mitochondrial function can be involved in obesity, [12,15,20,21,34] but few studies have  
33 analyzed the effect of its variations on BMI or obesity.[19,24] From all genes identified in the  
34 GWAS meta-analysis performed by Speliotes and colleagues,[8] only the *NDUFS3* (NADH  
35 dehydrogenase (ubiquinone) Fe-S protein 3) gene was identified to be within 300 Kb from the  
36 BMI associated SNPs. As these authors indicated, in spite of the large population analyzed in their  
37 study, many genetic variants related to BMI and obesity remain to be identified. The limitations  
38 of this meta-analysis come from the different microarrays used, with low coverage in many  
39 genomic regions. Therefore, the *NDUFS5* gene (where rs11205591 is located) has been analyzed  
40  
41  
42  
43  
44  
45  
46  
47  
48  
49  
50  
51  
52  
53  
54  
55  
56  
57  
58  
59  
60

1  
2 by only one polymorphism in each of the two most used microarrays by Speliotes and in most of  
3  
4 the GWAS performed to date;[8] (<http://www.Illumina.com>; <http://www.affymetrix.com>;  
5  
6 <http://www.ensembl.org>). In addition, representation of Mediterranean populations in Speliotes  
7  
8 and Locke's studies is very small, and, to our knowledge, Spanish populations are not  
9  
10 included.[8,9] Therefore, many important genetic regions, related to BMI and obesity regulation  
11  
12 in these populations may be missing from their work.  
13  
14

15  
16 The present study supports the hypothesis that genetic variations in MRC genes may be  
17  
18 related to obesity susceptibility in the Spanish population. Therefore, these genes could be new  
19  
20 therapeutic targets. Genetics of obesity are complex and not yet well identified, and our data may  
21  
22 contribute to a better understanding. One limitation of this study is the reduced size of the analyzed  
23  
24 populations. However, the statistical power is sufficient for the number of analyzed SNPs. On the  
25  
26 other hand, we have not studied all the possible SNPs present in these MRC genes. Further  
27  
28 functional studies and association analyses in larger samples and other populations should be  
29  
30 carried out to confirm our results.  
31  
32  
33  
34  
35  
36  
37  
38

### 39 **AUTHOR CONTRIBUTIONS**

40  
41 **G.DM-S.** obtained genetic data, analyzed and interpreted results and wrote the manuscript. **VGA**  
42  
43 obtained genetic data, contributed to analysis and interpretation and reviewed the manuscript.  
44  
45 **JTR, LSBF, MCS, ALS, and AC** obtained population data, made critical revisions of the  
46  
47 manuscript and contributed to the discussion. **JCME, GRM, RC, and MTML** contributed to  
48  
49 population studies and discussion, and reviewed and edited the manuscript. **FJC** and **ABGG**  
50  
51 designed the study, wrote the manuscript, contributed to discussion and reviewed and edited the  
52  
53 manuscript.  
54  
55  
56  
57  
58  
59  
60

## AKNOWLEDGEMENTS

We thank Dr. Manuel Serrano-Rios (Diabetes Research Laboratory, Biomedical Research Foundation from University Clinic Hospital San Carlos (Madrid, Spain) and CIBER of Diabetes and Associated Metabolic Diseases (CIBERDEM), Madrid, Spain) for his kind contribution in the development of this work.

## FUNDING

This study was supported by CIBER of Physiopathology, Obesity and Nutrition (CIBEROB) and CIBER of Diabetes and Metabolic Associated Diseases (CIBERDEM), initiatives of Carlos III Health Institute, Spanish Health Ministry; Project INGENFRED CIBER-02-08-2009 (CIBERDEM); research grants PI070497, PI081592, PI14/00874 and PIE14/00031 from the “Fondo de Investigaciones Sanitarias”; ACOMP/2009/201, GRUPOS03/101, 2005/027 and PROMETEO/2009/029 from the Valencian Government and grant SAF2005-02883 from the Spanish Ministry of Education and Science; GRS 279/A/08 of Regional Health Management of Castilla y León, Junta de Castilla y León.

## DISCLAIMER

Neither funder played a role in the study design, data analysis or interpretation of the data.

## COMPETING INTERESTS

There are no competing interests to declare

## DATA SHARING STATEMENT

No additional data are available.

## REFERENCES

1. Marques A, Peralta M, Naia A, et al. Prevalence of adult overweight and obesity in 20 European countries, 2014. *Eur J Public Health* 2018; 28:295-300.
2. Stunkard AJ, Foch TT, Hrubec Z. A twin study of human obesity. *JAMA* 1986; 256:51-54.
3. Chung WK, Leibel RL. Considerations regarding the genetics of obesity. *Obesity* (Silver Spring) 2008; 16:S33-39.
4. Sheikh AB, Nasrullah A, Haq S, et al. The Interplay of Genetics and Environmental Factors in the Development of Obesity. *Cureus* 2017; 9:e1435. doi:10.7759/cureus.1435
5. Andreasen CH, Andersen G. Gene-environment interactions and obesity—further aspects of genomewide association studies. *Nutrition* 2009; 25:998-1003.
6. Vimalaswaran KS, Loos RJ. Progress in the genetics of common obesity and type 2 diabetes. *Expert Rev Mol Med* 2010; 12:e7. doi:10.1017/S1462399410001389
7. Fawcett KA, Barroso I. The genetics of obesity: FTO leads the way. *Trends Genet* 2010;26:266-274
8. Speliotes EK, Willer CJ, Berndt SI, et al. Association analyses of 249,796 individuals reveal 18 new loci associated with body mass index. *Nat Genet* 2010; 42:937-948.
9. Locke AE, Kahali B, Berndt SI, et al., Genetic studies of body mass index yield new insights for obesity biology. *Nature* 2015; 518:197-206.
10. Goodarzi MO. Genetics of obesity: what genetic association studies have taught us about the biology of obesity and its complications. *Lancet Diabetes Endocrinol* 2018; 6:223-236.
11. Johannsen DL, Ravussin E. The role of mitochondria in health and disease. *Curr Opin Pharmacol.* 2009; 9:780-786.
12. Abdul-Ghani MA, DeFronzo RA. Mitochondrial dysfunction, insulin resistance, and type 2 diabetes mellitus. *Curr Diab Rep* 2008; 8:173-178.
13. Wang Z, Yuan D, Duan Y, et al. Key factors involved in obesity development. *Eat Weight Disord* 2017. doi: 10.1007/s40519-017-0428-3
14. Szendroedi J, Phielix E, Roden M. The role of mitochondria in insulin resistance and type 2 diabetes mellitus. *Nat Rev Endocrinol* 2011; 8:92-103.
15. Fosslien E. Review: Mitochondrial medicine--cardiomyopathy caused by defective oxidative phosphorylation. *Ann Clin Lab Sci* 2003; 33:371-395.

16. Rötig A, Munnich A. Genetic features of mitochondrial respiratory chain disorders. *J Am Soc Nephrol* 2003; 14:2995-3007.
17. Zhu X, Peng X, Guan MX, et al. Pathogenic mutations of nuclear genes associated with mitochondrial disorders. *Acta Biochim Biophys Sin (Shanghai)* 2009; 41:179-187.
18. Rodenburg RJ. Mitochondrial complex I-linked disease. *Biochim Biophys Acta* 2016; 1857:938-945.
19. Pospisilik JA, Knauf C, Joza N, et al. Targeted deletion of AIF decreases mitochondrial oxidative phosphorylation and protects from obesity and diabetes. *Cell* 2007; 131:476-491.
20. Harper ME, Green K, Brand MD. The efficiency of cellular energy transduction and its implications for obesity. *Annu Rev Nutr* 2008; 28:13-33.
21. Bournat JC, Brown CW. Mitochondrial dysfunction in obesity. *Curr Opin Endocrinol Diabetes Obes* 2010; 17:446-452.
22. de Mello AH, Costa AB, Engel JDG, Rezin GT. Mitochondrial dysfunction in obesity. *Life Sci* 2018; 192:26-32.
23. Dunham-Snary KJ, Ballinger SW. Mitochondrial genetics and obesity: evolutionary adaptation and contemporary disease susceptibility. *Free Radic Biol Med* 2013; 65:1229-1237.
24. Kunej T, Wang Z, Michal JJ, et al. Functional UQCRC1 polymorphisms affect promoter activity and body lipid accumulation. *Obesity (Silver Spring)* 2007; 15:2896-2901.
25. Jackman MR, Ravussin E, Rowe MJ, et al. Effect of a polymorphism in the ND1 mitochondrial gene on human skeletal muscle mitochondrial function. *Obesity (Silver Spring)* 2008; 16:363-368.
26. Mansego ML, Redon J, Marin R, et al. Renin polymorphisms and haplotypes are associated with blood pressure levels and hypertension risk in postmenopausal women. *J Hypertens* 2008; 26:230-237.
27. Soriguer-Escofet F, Esteva I, Rojo-Martinez G, et al. Diabetes Group of the Andalusian Society of Endocrinology and Nutrition. Prevalence of latent autoimmune diabetes of adults (LADA) in Southern Spain. *Diabetes Res Clin Pract* 2002; 56:213-220.
28. Martínez-Larrad MT, Fernández-Pérez C, González-Sánchez JL, et al., Prevalence of the metabolic syndrome (ATP-III criteria). Population-based study of rural and urban areas in the Spanish province of Segovia. *Med Clin (Barc)* 2005; 125(4):481-486.
29. Solé X, Guinó E, Valls J, et al. SNPStats: a web tool for the analysis of association studies. *Bioinformatics* 2006; 22:1928-1929.
30. Grimson A, Farh KK, Johnston WK, et al. MicroRNA targeting specificity in mammals: determinants beyond seed pairing. *Mol Cell* 2007; 27:91-105.

1  
2  
3 31. Friedman RC, Farh KK, Burge CB, et al. Most mammalian mRNAs are conserved targets of  
4 microRNAs. *Genome Res* 2009; 19:92-105.  
5

6 32. Frayling TM, Timpson NJ, Weedon MN, et al., A common variant in the FTO gene is  
7 associated with body mass index and predisposes to childhood and adult obesity. *Science* 2007;  
8 316:889-894.  
9

10 33. Loos RJ, Yeo GS. The bigger picture of FTO: the first GWAS-identified obesity gene. *Nat Rev*  
11 *Endocrinol* 2014; 10:51-61.  
12  
13

14 34. Okura T, Koda M, Ando F, et al. Association of the mitochondrial DNA 15497G/A  
15 polymorphism with obesity in a middle-aged and elderly Japanese population. *Hum Genet* 2003;  
16 113:432-436.  
17  
18  
19  
20  
21  
22  
23  
24  
25  
26  
27  
28  
29  
30  
31  
32  
33  
34  
35  
36  
37  
38  
39  
40  
41  
42  
43  
44  
45  
46  
47  
48  
49  
50  
51  
52  
53  
54  
55  
56  
57  
58  
59  
60



## LEGENDS

**Figure 1.** BMI differences found for the associated SNPs genotypes for each population analyzed in this study. Values are expressed as BMI difference means, showing 95% confidence interval.

**A)** rs10891319 BMI differences between AG-GG and AA genotypes, taking the first one (BMI difference=0 for carriers of AG-GG genotype) as reference. **B)** rs11205591 BMI differences for CC-CG and GG genotypes, with the first one as a reference (CC-CG genotype BMI difference=0).

**Figure 2.** Additive effect of rs10891319 and rs11205591 genotype combination in BMI and obesity risk. **A)** BMI means. \* indicates a p-value < 0.005. **B)** Obesity risk ORs. Rs11205591 CC-CG / rs10891319 AA genotypes were taken as a reference (OR=1). The obtained p-value was <0.003. Error bars show standard error. Data are expressed as rs11205591 / rs10891319 genotypes

1  
2  
3  
4  
5  
6  
7  
8  
9  
10  
11  
12  
13  
14  
15  
16  
17  
18  
19  
20  
21  
22  
23  
24  
25  
26  
27  
28  
29  
30  
31  
32  
33  
34  
35  
36  
37  
38  
39  
40  
41  
42  
43  
44  
45  
46

Figure 1



Figure 2.

A)



B)



**Table 1S:** Description of selected SNPs

| Gene Name | Chromosome | SNP Name   | chromosome position (GRCh38p10) | Most severe consequence | HGVS Name           | Reference sequence | MAF      | tag SNP |
|-----------|------------|------------|---------------------------------|-------------------------|---------------------|--------------------|----------|---------|
| COX5A     | 15         | rs1133322  | 74920016                        | DOWNSTREAM              | c.*436T>C           | NM_004255.3        | 0.25 (G) | 1**     |
| COX5B     | 2          | rs1470625  | 97649028                        | DOWNSTREAM              | g.97649028C>A       | NC_000012.12       | 0.46 (C) | 2**     |
|           |            | rs17022045 | 97645225                        | UPSTREAM                | c.-862C>G           | NM_001862.2        | 0.13 (G) | 1**     |
| COX6A1    | 12         | rs17431357 | 120442631                       | UPSTREAM                | g.120442631C>T      | NC_000012.12       | 0.04 (T) |         |
|           |            | rs12310837 | 120442769                       | UPSTREAM                | g.120442769A>G      | NC_000012.12       | 0.15 (G) |         |
|           |            | rs2076022  | 120437987                       | UPSTREAM                | c.-140C>T           | NM_004373.3        | 0.49 (T) | 2**     |
| COX6B1    | 19         | rs4806187  | 35658859                        | DOWNSTREAM              | c.*212A>G           | NM_001863.4        | 0.33 (A) | 1**     |
| COX6C     | 8          | rs1130569  | 99887565                        | SYNONYMOUS_CODING       | p.Tyr56=            | NP_004365.1        | 0.25 (A) |         |
|           |            | rs4626565  | 99878314                        | INTRONIC                | c.*16-49A>G         | NM_004374.3        | 0.23 (C) | 1**     |
| COX7A1    | 19         | rs753420   | 36152793                        | 5PRIME_UTR              | c.-386A>C           | NM_001864.3        | 0.40 (G) | 1**     |
|           |            | rs7255180  | 36149417                        | INTRONIC                | c.722-161C>T        | NM_001003962.2     | 0.02 (T) |         |
| COX7A2    | 6          | rs436898   | 75235832                        | DOWNSTREAM              | g.75235832A>C       | NC_000006.12       | 0.16 (A) |         |
|           |            | rs683943   | 75252092                        | UPSTREAM                | g.75252092C>G       | NC_000006.13       | 0.05 (C) |         |
|           |            | rs9360898  | 75243989                        | 5PRIME_UTR              | c.-159A>C           | NM_001865.3        | 0.21 (G) | 3**     |
| COX7B2    | 4          | rs9790574  | 46732884                        | DOWNSTREAM              | g.46732884C>T       | NC_000004.12       | 0.25 (T) |         |
| COX7C     | 5          | rs16902285 | 86621753                        | DOWNSTREAM              | g.86621753T>G       | NC_000005.10       | 0.07 (G) |         |
|           |            | rs13161296 | 86617233                        | UPSTREAM                | c.-823C>T           | NM_001867.2        | 0.01 (T) | 1**     |
|           |            | rs2410718  | 86622655                        | DOWNSTREAM              | g.86622655G>A       | NC_000005.10       | 0.12 (A) |         |
| COX8C     | 14         | rs2089095  | 93350593                        | INTRONIC                | c.-<br>351+17070C>G | NM_020818.4        | 0.11 (G) |         |
| NDUFS1    | 2          | rs1053517  | 206122291                       | DOWNSTREAM              | g.206122291A>G      | NC_000002.12       | 0.49 (G) | 1**     |
|           |            | rs3770989  | 206124027                       | 3PRIME_UTR              | c.*158T>C           | NM_001199981.1     | 0.03 (G) | 3**     |
|           |            | rs11548670 | 206147759                       | SYNONYMOUS_CODING       | p.Asp102=           | NP_001186910.1     | 0.07 (G) | 2**     |

**Table 1S cont:** Description of selected SNPs

| Gene Name | Chromosome | SNP Name   | chromosome position (GRCh38p10) | Most severe consequence            | HGVS Name      | Reference sequence | MAF      | tag SNP     |
|-----------|------------|------------|---------------------------------|------------------------------------|----------------|--------------------|----------|-------------|
| NDUFS2    | 1          | rs4656994  | 161210087                       | INTRONIC                           | c.703-24G>A    | NM_001166159.1     | 0.26 (A) | 3**         |
|           |            | rs1136224  | 161214307                       | 3PRIME_UTR                         | c.*366A>G      | NM_001166159.1     | 0.18 (G) | 6**         |
|           |            | rs1136207  | 161213726                       | SYNONYMOUS_CODING                  | p.Ala430=      | NP_001159631.1     | 0.16 (T) |             |
|           |            | rs4656993  | 161206347                       | INTRONIC                           | c.203-60A>G    | NM_001166159.1     | 0.30 (A) |             |
|           |            | rs11587213 | 161215085                       | UPSTREAM                           | g.161215085A>G | NC_000001.11       | 0.15 (G) | 5**         |
| NDUFS3    | 11         | rs10742816 | 47585432                        | UPSTREAM                           | g.47585432C>T  | NC_000011.10       | 0.25 (C) | 1**         |
| NDUFS4    | 5          | rs31304    | 53646253                        | SYNONYMOUS_CODING                  | p.Gly66=       | NP_001304980.1     | 0.06 (A) |             |
|           |            | rs567      | 53683267                        | 3PRIME_UTR                         | c.*46G>A       | NM_002495.3        | 0.38 (A) | 3**,5**,6** |
|           |            | rs535277   | 53658684                        | INTRONIC                           | c.424+60T>G    | NM_002495.3        | 0.29 (G) |             |
| NDUFS5    | 1          | rs1984600  | 39026255                        | UPSTREAM                           | c.-150G>C      | NM_004552.2        | 0.46 (G) | 1**         |
|           |            | rs11205591 |                                 | DOWNSTREAM                         |                |                    |          | 2**         |
| NDUFS6    | 5          |            | 39035577                        |                                    | g.39035577C>G  | NC_000001.11       | 0.24 (G) |             |
|           |            | rs11953620 | 1818516                         | DOWNSTREAM                         | g.1818516C>T   | NC_000005.10       | 0.42 (T) |             |
|           |            | rs4975851  | 1817222                         | DOWNSTREAM                         | g.1817222C>T   | NC_000005.10       | 0.38 (C) |             |
| NDUFS7    | 19         | rs11666067 | 1389518                         | non coding transcript exon variant | c.228+580C>A   | NM_024407.4        | 0.46 (A) |             |
| SDHB      | 1          | rs1022580  | 17033181                        | INTRONIC                           | c.201-36G>T    | NM_003000.2        | 0.04 (C) | 1**         |
|           |            | rs2647169  | 17044728                        | INTRONIC                           | c.200+33G>A    | NM_003000.2        | 0.11 (T) | 3**         |
|           |            | rs11203280 | 17016288                        | UPSTREAM                           | g.17016288G>T  | NC_000001.11       | 0.50 (G) |             |
|           |            | rs9435739  | 17016429                        | UPSTREAM                           | g.17016429G>A  | NC_000001.11       | 0.48 (A) |             |

**Table 1S cont2:** Description of selected SNPs

| Gene Name | Chromosome | SNP Name   | chromosome position (GRCh38p10) | Most severe consequence | HGVS Name      | Reference sequence | MAF      | tag SNP |
|-----------|------------|------------|---------------------------------|-------------------------|----------------|--------------------|----------|---------|
| SDHC      | 1          | rs4600063  | 161363401                       | 3PRIME_UTR              | g.161363401A>G | NC_000001.11       | 0.17 (G) | 3**     |
|           |            | rs13374037 | 161365491                       | 3PRIME_UTR              | g.161365491T>A | NC_000001.11       | 0.17 (A) |         |
| SDHD      | 11         | rs10891319 | 112096881                       | INTRONIC                | g.112096881A>G | NC_000011.10       | 0.35 (G) |         |
| UQCRB     | 8          | rs10504961 | 96227901                        | 3PRIME_UTR              | g.96227901C>T  | NC_000008.11       | 0.37 (T) |         |
| UQCRQ     | 5          | rs803224   | 132870812                       | UPSTREAM                | g.132870812G>A | NC_000005.10       | 0.18 (G) |         |
|           |            | rs17624157 | 132868339                       | UPSTREAM                | g.132868339G>A | NC_000005.10       | 0.05 (A) |         |
| GDF9      | 5          | rs39830    | 132865726                       | UPSTREAM                | g.132865726G>A | NC_000005.10       | 0.36 (C) | 3**,4** |
|           |            | rs30177    | 132866719                       | 5PRIME_UTR              | g.132866719C>G | NC_000005.10       |          |         |

SNP Name: dbSNP 149, Ensemble release 89. MAF: Minor allele frequency. HGVS name: nomenclature following Human Genome Variation Society guidelines

Table 1. STREGA reporting recommendations, extended from STROBE Statement

| Item                        | Item number | STROBE Guideline                                                                                     | Extension for Genetic Association Studies (STREGA)                                                     | Page # in Manuscript<br>(or N/A if not applicable) |
|-----------------------------|-------------|------------------------------------------------------------------------------------------------------|--------------------------------------------------------------------------------------------------------|----------------------------------------------------|
| <b>Title and Abstract</b>   | 1           | (a) Indicate the study's design with a commonly used term in the title or the abstract.              |                                                                                                        | 1                                                  |
|                             |             | (b) Provide in the abstract an informative and balanced summary of what was done and what was found. |                                                                                                        | 2                                                  |
| <b>Introduction</b>         |             |                                                                                                      |                                                                                                        |                                                    |
| <i>Background rationale</i> | 2           | Explain the scientific background and rationale for the investigation being reported.                |                                                                                                        | 3-4                                                |
| <i>Objectives</i>           | 3           | State specific objectives, including any pre-specified hypotheses.                                   | <b>State if the study is the first report of a genetic association, a replication effort, or both.</b> | 4                                                  |
| <b>Methods</b>              |             |                                                                                                      |                                                                                                        |                                                    |
| <i>Study design</i>         | 4           | Present key elements of study design early in the paper.                                             |                                                                                                        | 5-6                                                |

| Item         | Item number | STROBE Guideline                                                                                                                                                                                                                                                                                                                                                                                                                                                                            | Extension for Genetic Association Studies (STREGA)                                                                                                                 | Page # in Manuscript<br>(or N/A if not applicable) |
|--------------|-------------|---------------------------------------------------------------------------------------------------------------------------------------------------------------------------------------------------------------------------------------------------------------------------------------------------------------------------------------------------------------------------------------------------------------------------------------------------------------------------------------------|--------------------------------------------------------------------------------------------------------------------------------------------------------------------|----------------------------------------------------|
| Setting      | 5           | Describe the setting, locations and relevant dates, including periods of recruitment, exposure, follow-up, and data collection.                                                                                                                                                                                                                                                                                                                                                             |                                                                                                                                                                    | 5                                                  |
| Participants | 6           | <p>(a) <b>Cohort study</b> – Give the eligibility criteria, and the sources and methods of selection of participants. Describe methods of follow-up.</p> <p><b>Case-control study</b> – Give the eligibility criteria, and the sources and methods of case ascertainment and control selection. Give the rationale for the choice of cases and controls.</p> <p><b>Cross-sectional study</b> – Give the eligibility criteria, and the sources and methods of selection of participants.</p> | <b>Give information on the criteria and methods for selection of subsets of participants from a larger study, when relevant.</b>                                   | 5                                                  |
|              |             | <p>(b) <b>Cohort study</b> – For matched studies, give matching criteria and number of exposed and unexposed.</p> <p><b>Case-control study</b> – For matched studies, give matching criteria and the number of controls per case.</p>                                                                                                                                                                                                                                                       |                                                                                                                                                                    | NA                                                 |
| Variables    | 7           | (a) Clearly define all outcomes, exposures, predictors, potential confounders, and effect modifiers. Give diagnostic criteria, if applicable.                                                                                                                                                                                                                                                                                                                                               | <b>(b) Clearly define genetic exposures (genetic variants) using a widely-used nomenclature system. Identify variables likely to be associated with population</b> | 6                                                  |



| Item                            | Item number | STROBE Guideline                                                                                                                                                                                 | Extension for Genetic Association Studies (STREGA)                                                                                                                                                                                                                                                                                                                                                                                                                | Page # in Manuscript<br>(or N/A if not applicable) |
|---------------------------------|-------------|--------------------------------------------------------------------------------------------------------------------------------------------------------------------------------------------------|-------------------------------------------------------------------------------------------------------------------------------------------------------------------------------------------------------------------------------------------------------------------------------------------------------------------------------------------------------------------------------------------------------------------------------------------------------------------|----------------------------------------------------|
|                                 |             |                                                                                                                                                                                                  | <i>stratification (confounding by ethnic origin).</i>                                                                                                                                                                                                                                                                                                                                                                                                             |                                                    |
| <i>Data sources measurement</i> | 8*          | <i>(a)</i> For each variable of interest, give sources of data and details of methods of assessment (measurement). Describe comparability of assessment methods if there is more than one group. | <i>(b) Describe laboratory methods, including source and storage of DNA, genotyping methods and platforms (including the allele calling algorithm used, and its version), error rates and call rates. State the laboratory/centre where genotyping was done. Describe comparability of laboratory methods if there is more than one group. Specify whether genotypes were assigned using all of the data from the study simultaneously or in smaller batches.</i> | 5-6                                                |
| <i>Bias</i>                     | 9           | <i>(a)</i> Describe any efforts to address potential sources of bias.                                                                                                                            | <i>(b) For quantitative outcome variables, specify if any investigation of potential bias resulting</i>                                                                                                                                                                                                                                                                                                                                                           |                                                    |

| Item                          | Item number | STROBE Guideline                                                                                                               | Extension for Genetic Association Studies (STREGA)                                                                                                                      | Page # in Manuscript<br>(or N/A if not applicable) |
|-------------------------------|-------------|--------------------------------------------------------------------------------------------------------------------------------|-------------------------------------------------------------------------------------------------------------------------------------------------------------------------|----------------------------------------------------|
|                               |             |                                                                                                                                | <i>from pharmacotherapy was undertaken. If relevant, describe the nature and magnitude of the potential bias, and explain what approach was used to deal with this.</i> | NA                                                 |
| <i>Study size</i>             | 10          | Explain how the study size was arrived at.                                                                                     |                                                                                                                                                                         | 5                                                  |
| <i>Quantitative variables</i> | 11          | Explain how quantitative variables were handled in the analyses. If applicable, describe which groupings were chosen, and why. | <i>If applicable, describe how effects of treatment were dealt with.</i>                                                                                                | 5-6                                                |
| <i>Statistical methods</i>    | 12          | (a) Describe all statistical methods, including those used to control for confounding.                                         | <i>State software version used and options (or settings) chosen.</i>                                                                                                    | 7                                                  |
|                               |             | (b) Describe any methods used to examine subgroups and interactions.                                                           |                                                                                                                                                                         | 7                                                  |
|                               |             | (c) Explain how missing data were addressed.                                                                                   |                                                                                                                                                                         | 7                                                  |

| Item | Item number | STROBE Guideline                                                                                                                                                                                                                                                                                                           | Extension for Genetic Association Studies (STREGA)                                   | Page # in Manuscript<br>(or N/A if not applicable) |
|------|-------------|----------------------------------------------------------------------------------------------------------------------------------------------------------------------------------------------------------------------------------------------------------------------------------------------------------------------------|--------------------------------------------------------------------------------------|----------------------------------------------------|
|      | (d)         | <p><b>Cohort study</b> – If applicable, explain how loss to follow-up was addressed.</p> <p><b>Case-control study</b> – If applicable, explain how matching of cases and controls was addressed.</p> <p><b>Cross-sectional study</b> – If applicable, describe analytical methods taking account of sampling strategy.</p> |                                                                                      | NA                                                 |
|      | (e)         | Describe any sensitivity analyses.                                                                                                                                                                                                                                                                                         |                                                                                      |                                                    |
|      |             |                                                                                                                                                                                                                                                                                                                            | <i>(f) State whether Hardy-Weinberg equilibrium was considered and, if so, how.</i>  | 7                                                  |
|      |             |                                                                                                                                                                                                                                                                                                                            | <i>(g) Describe any methods used for inferring genotypes or haplotypes.</i>          | 7                                                  |
|      |             |                                                                                                                                                                                                                                                                                                                            | <i>(h) Describe any methods used to assess or address population stratification.</i> | NA                                                 |
|      |             |                                                                                                                                                                                                                                                                                                                            | <i>(i) Describe any methods used to address multiple</i>                             |                                                    |

| Item                    | Item number | STROBE Guideline                                                                                                                                                                                                | Extension for Genetic Association Studies (STREGA)                                                                                  | Page # in Manuscript<br>(or N/A if not applicable) |
|-------------------------|-------------|-----------------------------------------------------------------------------------------------------------------------------------------------------------------------------------------------------------------|-------------------------------------------------------------------------------------------------------------------------------------|----------------------------------------------------|
|                         |             |                                                                                                                                                                                                                 | <i>comparisons or to control risk of false positive findings.</i>                                                                   | 7                                                  |
|                         |             |                                                                                                                                                                                                                 | <i>(j) Describe any methods used to address and correct for relatedness among subjects</i>                                          | NA                                                 |
| <b>Results</b>          |             |                                                                                                                                                                                                                 |                                                                                                                                     |                                                    |
| <i>Participants</i>     | 13*         | (a) Report the numbers of individuals at each stage of the study – e.g., numbers potentially eligible, examined for eligibility, confirmed eligible, included in the study, completing follow-up, and analysed. | <b>Report numbers of individuals in whom genotyping was attempted and numbers of individuals in whom genotyping was successful.</b> | 5-6                                                |
|                         |             | (b) Give reasons for non-participation at each stage.                                                                                                                                                           |                                                                                                                                     | 5                                                  |
|                         |             | (c) Consider use of a flow diagram.                                                                                                                                                                             |                                                                                                                                     |                                                    |
| <i>Descriptive data</i> | 14*         | (a) Give characteristics of study participants (e.g., demographic, clinical, social) and information on exposures and potential confounders.                                                                    | <b>Consider giving information by genotype.</b>                                                                                     | 5                                                  |

| Item                | Item number | STROBE Guideline                                                                                                                                                                                                 | Extension for Genetic Association Studies (STREGA)                       | Page # in Manuscript<br>(or N/A if not applicable) |
|---------------------|-------------|------------------------------------------------------------------------------------------------------------------------------------------------------------------------------------------------------------------|--------------------------------------------------------------------------|----------------------------------------------------|
|                     |             | (b) Indicate the number of participants with missing data for each variable of interest.                                                                                                                         |                                                                          | 6                                                  |
|                     |             | (c) <b>Cohort study</b> – Summarize follow-up time, e.g. average and total amount.                                                                                                                               |                                                                          | NA                                                 |
| <i>Outcome data</i> | 15 *        | <b>Cohort study</b> —Report numbers of outcome events or summary measures over time.                                                                                                                             | <b>Report outcomes (phenotypes) for each genotype category over time</b> |                                                    |
|                     |             | <b>Case-control study</b> – Report numbers in each exposure category, or summary measures of exposure.                                                                                                           | <b>Report numbers in each genotype category</b>                          |                                                    |
|                     |             | <b>Cross-sectional study</b> – Report numbers of outcome events or summary measures.                                                                                                                             | <b>Report outcomes (phenotypes) for each genotype category</b>           | 10-11                                              |
| <i>Main results</i> | 16          | (a) Give unadjusted estimates and, if applicable, confounder-adjusted estimates and their precision (e.g., 95% confidence intervals). Make clear which confounders were adjusted for and why they were included. |                                                                          | 7                                                  |

| Item                  | Item number | STROBE Guideline                                                                                                  | Extension for Genetic Association Studies (STREGA)                                                                         | Page # in Manuscript (or N/A if not applicable) |
|-----------------------|-------------|-------------------------------------------------------------------------------------------------------------------|----------------------------------------------------------------------------------------------------------------------------|-------------------------------------------------|
|                       |             | (b) Report category boundaries when continuous variables were categorized.                                        |                                                                                                                            | 6                                               |
|                       |             | (c) If relevant, consider translating estimates of relative risk into absolute risk for a meaningful time period. |                                                                                                                            | NA                                              |
|                       |             |                                                                                                                   | <i>(d) Report results of any adjustments for multiple comparisons.</i>                                                     | 10-11                                           |
| <i>Other analyses</i> | 17          | (a) Report other analyses done – e.g., analyses of subgroups and interactions, and sensitivity analyses.          |                                                                                                                            |                                                 |
|                       |             |                                                                                                                   | <i>(b) If numerous genetic exposures (genetic variants) were examined, summarize results from all analyses undertaken.</i> | 10-11                                           |
|                       |             |                                                                                                                   | <i>(c) If detailed results are available elsewhere, state how they can be accessed.</i>                                    | NA                                              |
| <b>Discussion</b>     |             |                                                                                                                   |                                                                                                                            |                                                 |
| <i>Key results</i>    | 18          | Summarize key results with reference to study objectives.                                                         |                                                                                                                            | 14                                              |

| Item                     | Item number | STROBE Guideline                                                                                                                                                            | Extension for Genetic Association Studies (STREGA) | Page # in Manuscript<br>(or N/A if not applicable) |
|--------------------------|-------------|-----------------------------------------------------------------------------------------------------------------------------------------------------------------------------|----------------------------------------------------|----------------------------------------------------|
| <i>Limitations</i>       | 19          | Discuss limitations of the study, taking into account sources of potential bias or imprecision. Discuss both direction and magnitude of any potential bias.                 |                                                    | 14                                                 |
| <i>Interpretation</i>    | 20          | Give a cautious overall interpretation of results considering objectives, limitations, multiplicity of analyses, results from similar studies, and other relevant evidence. |                                                    | 14                                                 |
| <i>Generalizability</i>  | 21          | Discuss the generalizability (external validity) of the study results.                                                                                                      |                                                    | 14                                                 |
| <b>Other Information</b> |             |                                                                                                                                                                             |                                                    |                                                    |
| <i>Funding</i>           | 22          | Give the source of funding and the role of the funders for the present study and, if applicable, for the original study on which the present article is based.              |                                                    | 15                                                 |

STREGA = STrengthening the REporting of Genetic Association studies; STROBE = STrengthening the Reporting of Observational Studies in Epidemiology.

\* Give information separately for cases and controls in case-control studies and, if applicable, for exposed and unexposed groups in cohort and cross-sectional studies.

# BMJ Open

## RESPIRATORY CHAIN POLYMORPHISMS AND OBESITY IN THE SPANISH POPULATION, A CROSS-SECTIONAL STUDY

|                                 |                                                                                                                                                                                                                                                                                                                                                                                                                                                                                                                                                                                                                                                                                                                                                                                                                                                                                                                                                                                                                                                                                                                                                                                                                                                                                                                                                                                                                                                                                                                                                                                                                                                                                                                                                                                                                                                                                                                                                   |
|---------------------------------|---------------------------------------------------------------------------------------------------------------------------------------------------------------------------------------------------------------------------------------------------------------------------------------------------------------------------------------------------------------------------------------------------------------------------------------------------------------------------------------------------------------------------------------------------------------------------------------------------------------------------------------------------------------------------------------------------------------------------------------------------------------------------------------------------------------------------------------------------------------------------------------------------------------------------------------------------------------------------------------------------------------------------------------------------------------------------------------------------------------------------------------------------------------------------------------------------------------------------------------------------------------------------------------------------------------------------------------------------------------------------------------------------------------------------------------------------------------------------------------------------------------------------------------------------------------------------------------------------------------------------------------------------------------------------------------------------------------------------------------------------------------------------------------------------------------------------------------------------------------------------------------------------------------------------------------------------|
| Journal:                        | <i>BMJ Open</i>                                                                                                                                                                                                                                                                                                                                                                                                                                                                                                                                                                                                                                                                                                                                                                                                                                                                                                                                                                                                                                                                                                                                                                                                                                                                                                                                                                                                                                                                                                                                                                                                                                                                                                                                                                                                                                                                                                                                   |
| Manuscript ID                   | bmjopen-2018-027004.R2                                                                                                                                                                                                                                                                                                                                                                                                                                                                                                                                                                                                                                                                                                                                                                                                                                                                                                                                                                                                                                                                                                                                                                                                                                                                                                                                                                                                                                                                                                                                                                                                                                                                                                                                                                                                                                                                                                                            |
| Article Type:                   | Research                                                                                                                                                                                                                                                                                                                                                                                                                                                                                                                                                                                                                                                                                                                                                                                                                                                                                                                                                                                                                                                                                                                                                                                                                                                                                                                                                                                                                                                                                                                                                                                                                                                                                                                                                                                                                                                                                                                                          |
| Date Submitted by the Author:   | 28-Dec-2018                                                                                                                                                                                                                                                                                                                                                                                                                                                                                                                                                                                                                                                                                                                                                                                                                                                                                                                                                                                                                                                                                                                                                                                                                                                                                                                                                                                                                                                                                                                                                                                                                                                                                                                                                                                                                                                                                                                                       |
| Complete List of Authors:       | <p>de marco, griselda; Research Foundation of Valencia University Clinic Hospital-INCLIVA, Genomic and Genetic Diagnosis Unit</p> <p>Garcia-Garcia, Ana Barbara; CIBER of Diabetes and Associated Metabolic Diseases (CIBERDEM); Research Foundation of Valencia University Clinic Hospital-INCLIVA</p> <p>Real, Jose; University Clinical Hospital and INCLIVA, Service of Endocrinology and Nutrition; CIBER of Diabetes and Associated Metabolic Diseases (CIBERDEM)</p> <p>Gonzalez-Albert, Veronica; Research Foundation of Valencia University Clinic Hospital-INCLIVA, Genomic and Genetic Diagnosis Unit</p> <p>Briungos-Figuero, Laisa; Rio Hortega University Hospital, Internal Medicine Service</p> <p>Cobos-Siles, Marta; Rio Hortega University Hospital, Internal Medicine Service</p> <p>Lago-Sampedro, Ana; IBIMA.Regional University Hospital of Malaga, UMA,, Endocrinology and Nutrition Department; CIBER of Diabetes and Associated Metabolic Diseases (CIBERDEM)</p> <p>Corbaton, Arturo; Biomedical Research Foundation. University Hospital Clínico San Carlos, Diabetes Research Laboratory; CIBER of Diabetes and Associated Metabolic Diseases (CIBERDEM)</p> <p>Teresa Martinez-Larrad, Maria; Biomedical Research Foundation. University Hospital Clínico San Carlos, Diabetes Research Laboratory; CIBER of Diabetes and Associated Metabolic Diseases (CIBERDEM)</p> <p>Carmena, Rafael; University of Valencia, Department of Medicine</p> <p>Martin-Escudero, Juan; Rio Hortega University Hospital, Internal Medicine Service</p> <p>Rojo, Gemma; IBIMA.Regional University Hospital of Malaga, UMA,, Endocrinology and Nutrition Department; CIBER of Diabetes and Associated Metabolic Diseases (CIBERDEM)</p> <p>Chaves, Felipe; Research Foundation of Valencia University Clinic Hospital-INCLIVA, Genomic and Genetic Diagnosis Unit; CIBER of Diabetes and Associated Metabolic Diseases (CIBERDEM)</p> |
| <b>Primary Subject Heading</b>: | Genetics and genomics                                                                                                                                                                                                                                                                                                                                                                                                                                                                                                                                                                                                                                                                                                                                                                                                                                                                                                                                                                                                                                                                                                                                                                                                                                                                                                                                                                                                                                                                                                                                                                                                                                                                                                                                                                                                                                                                                                                             |
| Secondary Subject Heading:      | Diabetes and endocrinology                                                                                                                                                                                                                                                                                                                                                                                                                                                                                                                                                                                                                                                                                                                                                                                                                                                                                                                                                                                                                                                                                                                                                                                                                                                                                                                                                                                                                                                                                                                                                                                                                                                                                                                                                                                                                                                                                                                        |
| Keywords:                       | Obesity, SNP, mitochondrial respiratory chain                                                                                                                                                                                                                                                                                                                                                                                                                                                                                                                                                                                                                                                                                                                                                                                                                                                                                                                                                                                                                                                                                                                                                                                                                                                                                                                                                                                                                                                                                                                                                                                                                                                                                                                                                                                                                                                                                                     |
|                                 |                                                                                                                                                                                                                                                                                                                                                                                                                                                                                                                                                                                                                                                                                                                                                                                                                                                                                                                                                                                                                                                                                                                                                                                                                                                                                                                                                                                                                                                                                                                                                                                                                                                                                                                                                                                                                                                                                                                                                   |



1  
2  
3  
4  
5  
6  
7  
8  
9  
10  
11  
12  
13  
14  
15  
16  
17  
18  
19  
20  
21  
22  
23  
24  
25  
26  
27  
28  
29  
30  
31  
32  
33  
34  
35  
36  
37  
38  
39  
40  
41  
42  
43  
44  
45  
46  
47  
48  
49  
50  
51  
52  
53  
54  
55  
56  
57  
58  
59  
60



1  
2 **RESPIRATORY CHAIN POLYMORPHISMS AND OBESITY IN THE SPANISH**  
3 **POPULATION, A CROSS-SECTIONAL STUDY**  
4  
5  
6  
7

8  
9 Griselda De Marco<sup>1</sup>, Ana Barbara García-García<sup>1, 2</sup>, Jose Tomas Real<sup>2,3,4</sup>, Veronica Gonzalez-  
10 Albert <sup>1</sup>, Laisa-Socorro Briongos-Figuero<sup>5</sup>, Marta Cobos-Siles<sup>5</sup>, Ana Lago-Sampedro <sup>2,6</sup>, Arturo  
11 Corbaton<sup>2,7</sup>, Maria T. Martinez-Larrad<sup>2,7</sup>, Rafael Carmena<sup>4</sup>, Juan Carlos Martín Escudero<sup>5</sup>, Gemma  
12 Rojo-Martínez<sup>2,6</sup>, Felipe Javier Chaves<sup>1,2</sup>.  
13  
14  
15  
16  
17  
18

19 <sup>1</sup> Genomic and Genetic Diagnosis Unit. Research Foundation of Valencia University Clinical  
20 Hospital-INCLIVA. Valencia, Spain.  
21  
22

23 <sup>2</sup> CIBER of Diabetes and Associated Metabolic Diseases (CIBERDEM), Madrid. Spain.  
24  
25

26 <sup>3</sup> Endocrinology and Nutrition Service, University Clinical Hospital and INCLIVA, Valencia,  
27 Spain.  
28  
29

30 <sup>4</sup> Department of Medicine, University of Valencia, Valencia, Spain  
31  
32

33 <sup>5</sup> Internal Medicine Service. Rio Hortega University Hospital. Valladolid, Spain  
34  
35

36 <sup>6</sup> Endocrinology and Nutrition Department. IBIMA.Regional University Hospital of Malaga,  
37 UMA, Malaga, Spain  
38  
39

40 <sup>7</sup> Diabetes Research Laboratory. Biomedical Research Foundation. University Clinical Hospital  
41 San Carlos. Madrid Spain.  
42  
43  
44  
45

46 Corresponding author: Ana-Barbara Garcia-Garcia.  
47

48 E-mail: [a.barbara.garcia@ext.uv.es](mailto:a.barbara.garcia@ext.uv.es). Current address: Menendez Pelayo 4acc, Valencia 46010.  
49

50 Tel: 0034-963864100 ext 83916  
51  
52

53 Word count: excluding title page, abstract, references figures and tables: 2619  
54  
55  
56  
57  
58  
59  
60

**ABSTRACT**

**OBJECTIVE:** To study the association of genes involved in the Mitochondrial Respiratory Chain (MRC) pathway with Body Mass Index (BMI) and obesity risk.

**DESIGN:** This work studies three cross-sectional populations from Spain, representing three provinces: HORTEGA (Valladolid, Northwest/Center), SEGOVIA (Segovia, Northwest/center), and PIZARRA (Malaga, South).

**SETTING:** Forty-eight SNPs from MRC genes were selected and genotyped by SNPlex method. Association studies with BMI and obesity risk were performed for each population. These associations were then verified by analysis of the studied population as a whole (3731 samples).

**PARTICIPANTS:** a total of 3731 Caucasian individuals: 1502 samples from HORTEGA, 988 from PIZARRA and 1241 from SEGOVIA.

**RESULTS:** rs4600063 (*SDHC*), rs11205591 (*NDUFS5*) and rs10891319 (*SDHD*) SNPs were associated with BMI and obesity risk (p values for BMI were 0.04, 0.0011 and 0.0004, respectively, and for obesity risk, 0.0072, 0.039 and 0.0038). However, associations between rs4600063 and BMI, and between these 3 SNPs and obesity risk are not significant if Bonferroni correction is considered. In addition, rs11205591 and rs10891319 polymorphisms showed an additive interaction with BMI and obesity risk.

**CONCLUSIONS:** Several polymorphisms from genes coding MRC proteins may be involved in BMI variability and could be related to the risk to become obese in the Spanish general population.

**KEYWORDS:** Obesity, SNP, mitochondrial respiratory chain,

## STRENGTHS AND LIMITATIONS OF THIS STUDY:

- This research was conducted in three open populations from different provinces of Spain.
- MRC SNP analysis by SNPlex genotyping method overcomes some of the limitations of GWAS.
- One of the limitations of this study is the reduced size of the populations used
- Despite the limited number of individuals in this study, the statistical power is sufficient for the number of analyzed SNPs.
- Results from this study are promising and should be validated by larger sample sizes

## INTRODUCTION

Obesity is a metabolic disorder consisting of excess body fat accumulation. Obesity prevalence has been increasing during the last decades in Western Societies, becoming one of the most important public health problems due to its causally relationship with several chronic diseases such as insulin resistance (IR), cardiovascular disease (CVD) and type 2 diabetes mellitus (T2DM).[1]

Susceptibility to obesity is determined by environmental and genetic factors. Although rising obesity prevalence is triggered by lifestyle changes, the risk of developing obesity has an important genetic component, which has been examined in numerous studies.[2-4] Rare mutations in genes encoding for appetite-regulating proteins, such as leptin (*LEP*) and its receptor (*LEPR*), melanocortin-4 receptor (*MC4R*) and pro-opiomelanocortin (*POMC*), have shown to cause severe early-onset obesity.[5-6] Genome wide association studies (GWAS) have identified common polymorphisms located in, or near to, 97 loci, mostly expressed in the central nervous system.[6-

1  
2 10] However, it is also suggested that, due to limitations of GWAS, there are around 250 common  
3  
4 variants with a similar effect to those previously described that remain to be identified.[8]  
5

6 The study of target genes or genes involved in a particular physiological pathway is a  
7 potential approach to identify genetic variants with roles in complex traits. The mitochondrial  
8 respiratory chain (MRC) is a biological system involved in carbohydrate and lipid metabolism  
9 through oxidative phosphorylation. MRC produces the proton gradient needed for ATP synthesis  
10 and is composed of four large complexes (I to IV) that transport electrons from donors (NADH at  
11 complex I, FADH<sub>2</sub> at complex II) to acceptors. Finally, electrons in complex IV are conducted to  
12 the last acceptor, the molecular oxygen. [11] Mitochondrial oxidative capacity dysfunction in  
13 liver, muscle or adipose tissue could contribute to the intracellular accumulation of fatty acids  
14 observed in obesity.[12-13] Insulin resistance has been associated with lower mitochondria  
15 activity at rest.[14] This may be the result of inherited defects in genes coding MRC proteins.  
16  
17  
18  
19  
20  
21  
22  
23  
24  
25  
26  
27  
28

29 Mutations of MRC genes resulting in loss of function have been reported to produce major  
30 disability-causing diseases.[15-18] In addition, studies on their impact on energy efficiency and  
31 expenditure have shown an association with the risk of developing obesity.[12, 19-21] Studies  
32 have also shown that obesity affects the function of mitochondria, leading to mitochondrial  
33 dysfunction.[22] Mitochondrial dynamics play a role in metabolism and obesity: *MFN2*, a gene  
34 coding for a GTPase in the outer mitochondrial membrane is involved in mitochondrial fusion,  
35 regulating the operation of the mitochondrial network in skeletal muscle. When *MFN2* is  
36 repressed, glucose oxidation and mitochondrial membrane potential are impaired.[23] It has been  
37 shown that expression of *MNF2* is repressed in obese patients compared to lean.[23] Furthermore,  
38 polymorphisms in MRC genes, or others related to its regulation, have been related to obesity in  
39 different populations.[23-25]  
40  
41  
42  
43  
44  
45  
46  
47  
48  
49  
50  
51  
52  
53  
54  
55  
56  
57  
58  
59  
60

1  
2 The aim of this study was to find associations between MRC nuclear genes, BMI and  
3  
4 obesity in three different Spanish studies in the general population.  
5  
6  
7  
8  
9  
10  
11  
12

## 13 **MATERIALS AND METHODS**

### 14 15 16 17 18 **Sample Populations**

19  
20 We independently analyzed three general Spanish populations originally recruited for the  
21 study of cardiovascular risk factors and cardiovascular disease development: HORTEGA (1502  
22 subjects collected from 2004 to 2005), PIZARRA (988 individuals, collected from 2009 and 2010)  
23 and SEGOVIA (1239 subjects, collected between 2000 and 2003). [26-28] The HORTEGA  
24 sample involves subjects from the Valladolid area (North-western Spain). The PIZARRA sample  
25 comprises subjects from Pizarra, a town in the Malaga province (Andalusia, Southern Spain). The  
26 SEGOVIA sample studied subjects from the Segovia Province (Center of Spain). These three  
27 populations were recruited to identify cardiovascular risk factors in the general population as an  
28 overall goal. Individuals were randomly selected and invited to participate. Exclusion criteria were  
29 any concomitant disease or condition that prevented them from answering a survey, or donating a  
30 sample or that would influence the collection of reliable information. The study was approved by  
31 the Research and Ethics Committee from the Valencia University Clinical Hospital and INCLIVA  
32 (reference number 2010/013). All patients provided informed written consent to take part in the  
33 investigations. The research was carried out according to the Ethical Principles of the World  
34 Medical Association (Declaration of Helsinki)  
35  
36  
37  
38  
39  
40  
41  
42  
43  
44  
45  
46  
47  
48  
49  
50  
51  
52  
53

54 Demographic data and anthropometric parameters were collected following standard  
55  
56  
57  
58  
59  
60

1  
2 procedures. Presence of obesity, hypertension (HTN) and Type 2 Diabetes mellitus (T2DM) was  
3  
4 recorded. BMI was calculated by dividing weight in kilograms by height in meters squared.  
5  
6 Obesity, HTN and T2DM were defined using the World Health Organization (WHO) criteria  
7  
8 (<http://www.who.int>). Briefly, obesity was diagnosed with a BMI  $>30$  kg/m<sup>2</sup>, overweight as BMI  
9  
10 between 25.0 and 29.9 kg/m<sup>2</sup>, and normal weight as BMI  $\leq 24.9$  kg/m<sup>2</sup>. HTN was defined by  
11  
12 systolic and diastolic blood pressure above 140 or 90 mm Hg, respectively. T2DM was defined by  
13  
14 fasting plasma glucose  $\geq 126$ mg/dl or 2-hour plasma glucose  $\geq 200$ mg/dl. Previous diagnosis of  
15  
16 T2DM or HTN and detection of the disease at the moment of sample collection were recorded.  
17  
18 Missing data for parameters regarding this work (expressed as HORTEGA missing data /  
19  
20 PIZARRA missing data / SEGOVIA missing data) were 58/58/6 for BMI and 1/85/63 for glucose.  
21  
22  
23  
24

25 We have calculated the statistical power for our three samples independently (minor  
26  
27 allele frequency (MAF)  $>0.10$ , genotype relative risk (1.5)), number of obese and non-obese and  
28  
29 prevalence of obesity in each of the populations. Furthermore, the statistical power was over 85%  
30  
31 for this conditions in all populations and it increases for increased allele frequency  
32  
33 ([http://csg.sph.umich.edu/abecasis/cats/gas\\_power\\_calculator/index.html](http://csg.sph.umich.edu/abecasis/cats/gas_power_calculator/index.html)).  
34  
35  
36  
37  
38  
39  
40

## 41 **Genotyping methods**

42  
43 Gene and SNP selection:

44  
45 Forty-eight single nucleotide polymorphisms (SNPs) of chromosomal genes coding for  
46  
47 MRC proteins were selected for genotyping. Selection was performed based on the following  
48  
49 considerations: functionality (previously described or possible effect), MAF  $\geq 1\%$ , representation  
50  
51 of genetic variability of the whole gene (HapMap polymorphisms), and spacing along the gene.  
52  
53 Most important variants described in the literature were included. Details of genes and SNPs  
54  
55  
56  
57  
58  
59  
60

1 included are shown as supplemental material (Table 1S).

## 6 Genotyping procedure:

9 Venous blood samples were collected in tubes containing EDTA. DNA was isolated by  
10 standard commercial procedures (Chemagic Magnetic Separator from Chemagen, Baesweiler,  
11 Germany). DNA was quantified and diluted to a final concentration of 100 ng/ul.

15 SNPlex (Applied Biosystems, Foster City, California, USA) was used for genotyping,  
16 following the manufacturer's guidelines. SNPlex is a genotyping system based on oligonucleotide  
17 ligation assay/polymerase chain reaction technology that analyzes 48 SNPs. Those SNPs were  
18 chosen as explained above.

## 27 Statistical analysis

29 Statistical analyses were performed using SPSS version 19 and SNPStats software. [29]

32 Chi-squared test and variance analysis were used to compare quantitative and categorical  
33 variables between groups in order to assess general characteristics of the studied populations. P-  
34 values  $\leq 0.05$  were considered significant.

39 When analyzing for associations between SNPs and obesity traits in the three populations,  
40 11 out of the 48 SNPs were excluded from the study because they did not fulfill the Hardy-  
41 Weimberg equilibrium, had low frequency, or were not detectable by the genotyping procedure.  
42 Hardy-Weimberg test indicated no loss of heterozigosity in the analyzed populations for these  
43 SNPs. The Bonferroni correction cut off to assess significant associations was calculated for the  
44 37 remaining SNPs. Those polymorphisms associated in at least one of the three populations and  
45 showing the same tendency in the remaining ones, or results with p-values near the nominal cut  
46 off point in the three studies ( $p < 0.05$ ), were also analyzed in the 3729 total combined subjects from  
47  
48  
49  
50  
51  
52  
53  
54  
55  
56  
57  
58  
59  
60



1  
2 the three populations. For these analyses, multivariate logistic regression under co-dominant model  
3  
4 was performed and, if applicable, dominant, recessive, or additive models were used. For  
5  
6 categorical variables, adjusted odds ratios were assessed with 95% confidence interval. The  
7  
8 association between polymorphisms and BMI values was examined using analysis of covariance  
9  
10 (ANCOVA). All p-values were two-sided. All results were obtained after adjustment for age and  
11  
12 gender, and p-values <0.05 were considered significant.  
13  
14  
15  
16  
17

### 18 **Patient and Public involvement**

19  
20 Patients and public were not actively involved in this research. They were informed  
21  
22 regarding the research goals, protocol development and parameters to be measured before starting  
23  
24 the study. If appropriate, they were informed regarding results.  
25  
26  
27  
28  
29  
30  
31

## 32 **RESULTS**

### 33 34 35 36 **Characteristics of the studied populations**

37  
38 General characteristics of the studied populations are summarized in Table 1. Age, gender  
39  
40 and BMI varied between the three populations. There were differences in obesity and T2DM  
41  
42 percentage: obesity prevalence was 17%, 26% and 33% for Horteiga, Segovia and Pizarra studies,  
43  
44 respectively, while T2DM prevalence was 7.6%, 10.2% and 19.6%. Increased means of age  
45  
46 correspond to the age structure of our population. BMI means correspond to overweight values,  
47  
48 what is in agreement with the fact that obesity is increasing in Western Societies (WHO).  
49  
50  
51  
52  
53  
54  
55  
56  
57  
58  
59  
60

**Table 1:** General features of Hortega, Pizarra and Segovia patients considered individually and as a whole population

|                               | Hortega                | Pizarra                   | Segovia                  | Whole Population         |
|-------------------------------|------------------------|---------------------------|--------------------------|--------------------------|
| <b>N</b>                      | 1502                   | 988                       | 1241                     | 3731                     |
| <b>Age (Years)</b>            | 54.4 ± 19.3*           | 46.1 ± 13.9***            | 51.9 ± 10.8**            | 51.4 ± 15.9              |
| <b>Height (m)</b>             | 163.7 ± 10.0*          | 161 ± 8.8                 | 161.4 ± 9.0**            | 162.2 ± 9.4              |
| <b>Weight (Kg)</b>            | 70.8 ± 12.9*           | 74.1 ± 4.3***             | 72.1 ± 12.4**            | 72.1 ± 13.2              |
| <b>BMI (Kg/m<sup>2</sup>)</b> | 26.4 ± 4.2*            | 28.6 ± 5.3***             | 27.7 ± 4.3**             | 27.4 ± 4.6               |
| <b>Gender M(%) / F(%)</b>     | 754(50.2) / 748(49.8)* | 365(36.9) / (616(62.3)*** | 562(45.3) / (679(54.7)** | 2043(54.8) / (1681(45.1) |
| <b>Obesity (N(%))</b>         | 262(17.4)*             | 331(33.5)***              | 319(25.7)**              | 912(24.4)                |

M: Male. F: Female. Values expressed as mean ± SD except for gender and obesity. p value <0.05 was considered significant. \*for p<0.05 when comparing Hortega with Pizarra, \*\* p<0.05 when comparing Hortega and Segovia, \*\*\* for p<0.05 when comparing Pizarra and Segovia

### Association between MRC genes SNPs and obesity

We performed the analysis looking for associations between SNPs, BMI and obesity risk in the three independent populations. Table 2 shows results for SNPS with differences in at least one of the three populations and a similar trend in the remaining ones, or that had p-values near the nominal cut-off point ( $p \leq 0.05$ ) in the three studies: rs1136224 (*NDUFS2* gene), rs11205591

(*NDUFS5*), rs4600063 (*SDHC*), rs3770989 (*NDUFS1*) and rs10891319 (*SDHD*). These five SNPs were selected for further analysis in the whole population.

**Table 2:** BMI and obesity risk of associated SNPs for Hortegea, Pizarra and Segovia populations.

|                             | Geno-<br>type | HORTEGA |                             |                          | PIZARRA |                             |                          | SEGOVIA |                             |                       |
|-----------------------------|---------------|---------|-----------------------------|--------------------------|---------|-----------------------------|--------------------------|---------|-----------------------------|-----------------------|
|                             |               | N       | BMI<br>(Kg/m <sup>2</sup> ) | Obesity<br>OR<br>(95%CI) | N       | BMI<br>(Kg/m <sup>2</sup> ) | Obesity<br>OR<br>(95%CI) | N       | BMI<br>(Kg/m <sup>2</sup> ) | Obesity OR<br>(95%CI) |
| <i>SDHC</i><br>rs4600063    | AA            | 1250    | 26.46±0.12                  | 1                        | 772     | 28.70±0.19                  | 1                        | 943     | 27.71±0.10                  | 1                     |
|                             | AG-GG         | 183     | 26.16±0.30                  | 0.82<br>(0.55-1.22)      | 96      | 27.86±0.04                  | 0.47<br>(0.28-0.78)      | 132     | 27.21±0.30                  | 0.88<br>(0.57-1.36)   |
|                             | HWE:1         |         | 0.9                         | 0.33                     |         | 0.071                       | <b>0.0025</b>            |         | 0.22                        | 0.57                  |
| <i>NDUFS1</i><br>rs3770989  | TT            | 1308    | 26.41±0.12                  | 1                        | 799     | 28.49±0.10                  | 1                        | 1028    | 27.56±0.10                  | 1                     |
|                             | CT-CC         | 114     | 26.62±0.44                  | 1.13<br>(0.72-1.77)      | 77      | 29.85±0.60                  | 1.5<br>(0.91-2.48)       | 65      | 27.92±0.60                  | 1.28<br>(0.73-2.23)   |
|                             | HWE:1         |         | 0.34                        | 0.6                      |         | <b>0.016</b>                | 0.12                     |         | 0.48                        | 0.39                  |
| <i>NDUFS2</i><br>rs1136224  | AA            | 1045    | 26.37±0.13                  | 1                        | 640     | 28.61±0.21                  | 1                        | 830     | 27.55±0.15                  | 1                     |
|                             | AG-GG         | 369     | 26.59±0.23                  | 1.43<br>(1.09-1.89)      | 223     | 28.59±0.34                  | 1.10<br>(0.79-1.54)      | 241     | 27.77±0.26                  | 1.07<br>(0.76-1.48)   |
|                             | HWE:0.36      |         | 0.25                        | <b>0.011</b>             |         | 0.71                        | 0.58                     |         | 0.42                        | 0.71                  |
| <i>NDUFS5</i><br>rs11205591 | CC-CG         | 1309    | 26.47±0.12                  | 1                        | 832     | 28.63±0.10                  | 1                        | 947     | 27.6±0.14                   | 1                     |
|                             | GG            | 115     | 25.78±0.31                  | 0.67<br>(0.41-1.10)      | 38      | 27.66±0.70                  | 0.86<br>(0.41-1.81)      | 89      | 27.21±0.40                  | 0.89<br>(0.53-1.5)    |
|                             | HWE:0.76      |         | <b>0.049</b>                | 0.11                     |         | 0.38                        | 0.69                     |         | 0.25                        | 0.66                  |
| <i>SDHD</i><br>rs10891319   | AA            | 691     | 26.16±0.16                  | 1                        | 401     | 28.18±0.26                  | 1                        | 571     | 27.37±0.17                  | 1                     |
|                             | AG-GG         | 726     | 26.64±0.16                  | 1.16<br>(0.90-1.49)      | 478     | 29.00±0.24                  | 1.22<br>(0.91-1.64)      | 492     | 27.83±0.19                  | 1.27<br>(0.96-1.68)   |
|                             | HWE:0.22      |         | 0.08                        | 0.25                     |         | 0.084                       | 0.18                     |         | 0.077                       | 0.095                 |

BMI: mean ± SD. OR: odds ratio; 95%CI: 95% confidence interval. HWE: Hardy Weinberg Equilibrium. N: Number of individuals. Bold: significant

Analyzing these five SNPs in the total population, four polymorphisms were associated with BMI: rs4600063, rs10891319, rs3770989, rs11205591, located in the *SDHC*, *SDHD*, *NDUFS1* and *NDUFS5*, genes respectively. Results for these four SNPs are shown in Table 3: rs4600063 and rs3770989 showed low association with BMI, which lost significance after

Bonferroni correction ( $p < 0.0013$ ). Rs10891319 and rs11205591 showed significant association with BMI after Bonferroni correction, with a p-value of 0.0004 for the first one and 0.0011 for the second one. On the other hand, rs4600063 (genotypes AG and GG) and rs11205591 (GG genotype) reduced obesity risk, while rs10891319 (AG and GG genotypes) and rs1136224 (AG and GG genotypes) increased the risk ( $p < 0.05$ ), but they did not reach the Bonferroni cut-off point.

**Table 3:** SNP Genotyping: distribution of BMI levels and the associated obesity risk for all genotypes in whole population.

| Gene/SNP           | Genotype | N           | BMI (Kg/m <sup>2</sup> ) | Non Obesity (N(%)) | Obesity (N(%)) | OR (95% CI)         |
|--------------------|----------|-------------|--------------------------|--------------------|----------------|---------------------|
| <i>SDHC</i>        | AA       | 2965        | 27.44±0.08               | 2109(86.9)         | 851(90.4)      | 1                   |
| <b>rs4600063</b>   | AG-GG    | 411         | 26.89±0.21               | 318(13.1)          | 90(9.6)        | 0.72<br>(0.56-0.92) |
|                    | p-value  |             | <b>0.04</b>              |                    |                | <b>0.0072</b>       |
| <i>SDHD</i>        | AA       | 1663        | 27.06±0.11               | 1243(51.3)         | 422(45.4)      | 1                   |
| <b>rs10891319</b>  | AG-GG    | 1696        | 27.60±0.11               | 1178(48.7)         | 508(54.6)      | 1.25<br>(1.08-1.46) |
|                    | p-value  |             | <b>0.0004</b>            |                    |                | <b>0.0038</b>       |
| <i>NDUFS1</i>      | TT       | 3135        | 27.32±0.08               | 2273(92.9)         | 857(91.2)      | 1                   |
| <b>rs3770989</b>   | CT-CC    | 256         | 27.92±0.32               | 173(7.1)           | 83(8.8)        | 1.30<br>(0.99-1.72) |
|                    | p-value  |             | <b>0.026</b>             |                    |                | 0.066               |
| <i>NDUFS2</i>      | AA       | 2515        | 27.33±0.09               | 1833(76.1)         | 680(73)        | 1                   |
| <b>rs1136224</b>   | AG-GG    | 833         | 27.46±0.16               | 575(23.9)          | 251(27)        | 1.20(1.01-1.43)     |
|                    | p-value  |             | 0.31                     |                    |                | <b>0.041</b>        |
| <i>NDUFS5</i>      | CC-CG    | <b>3088</b> | 27.40±0.08               | 2219(92.3)         | 863(94)        | 1                   |
| <b>rs11205591*</b> | GG       | <b>242</b>  | 26.60±0.24               | 184(7.7)           | 55(6)          | 0.72<br>(0.52-0.99) |
|                    | p-value  |             | <b>0.0011</b>            |                    |                | <b>0.039</b>        |

OR: odds ratio; 95%CI: 95% confidence interval. BMI values are expressed as mean ± standard deviation. Results after adjustment for the following variables included in the model: age and gender. N: Number of individuals. \*tag-SNP.

1  
2  
3  
4  
5  
6  
7 Figure 1 shows BMI differences for rs10891319 and rs11205591 polymorphisms in each  
8 independent population and as a whole. A similar trend can be observed in both figures 1A and  
9 1B, although only the rs11205591 SNP reaches significance in the HORTEGA study ( $p \leq 0.05$ ).  
10  
11  
12  
13  
14  
15

16 We studied additive effects for all these SNPs and an additive effect for rs11205591 and  
17 rs10891319 SNPs was found in the whole sample: patients carrying GG/AA combination  
18 presented significant lower BMI (Figure 2A) and lower obesity risk (Figure 2B) than patients  
19 carrying CC-CG / AG-GG genotypes (data are expressed as rs11205591 genotype / rs10891319  
20 genotype).  
21  
22  
23  
24  
25  
26

27 On the other hand, some of the SNPs were within the gene. We calculated possible  
28 haplotypes, with negative results.  
29  
30  
31  
32  
33  
34  
35

## 36 DISCUSSION

37  
38  
39  
40

41 The goal of this population-based study was to analyze MRC SNPs and their association with BMI  
42 and obesity risk in three Spanish populations. SNPs with the most relevant associations were tested  
43 in the pooled sample.  
44  
45  
46

47 We found a significant protective association with the risk of obesity for rs10891319 AA,  
48 and for patients with the rs11205591 GG genotype, who also showed reduced BMI. Despite  
49 differences in age, sex, BMI, and obesity prevalence between the three samples, a similar trend  
50 was found considering them individually, while rs10891319 showed the strongest in the whole  
51  
52  
53  
54  
55  
56  
57  
58  
59  
60

1  
2 sample. Furthermore, an additive interaction was observed between these two SNPs, with a  
3  
4 maximal BMI difference of 1.4 kg/m<sup>2</sup> found between genotypes (CC-GG / AA-GG vs GG / AA  
5  
6 carriers, expressed as rs11205591/ rs10891319 genotype carriers). In agreement with these  
7  
8 findings, significant differences in obesity risk were also found.  
9

10  
11 Another SNP associated with BMI in one of the three populations and in the whole group,  
12  
13 rs3770989, is located in the 3'UTR region of the *NDUFS1* gene, which codes for NADH  
14  
15 dehydrogenase (ubiquinone) Fe-S protein 1. In silico analysis in TargetScanHuman  
16  
17 ([http://www.targetscan.org/vert\\_50/](http://www.targetscan.org/vert_50/)) showed that this SNP is located between two regions of  
18  
19 miRNA binding sites, although it does not seem to affect either of them.[30,31] On the other hand,  
20  
21 the rs11205591 and rs10891319 SNPs are located in 3' regions of *NDUFS5* and *SDHD* genes  
22  
23 respectively. Although these SNPs have an unknown functional effect, they could be in linkage  
24  
25 disequilibrium with other truly functional polymorphisms. New studies are needed to address this  
26  
27 question.  
28  
29  
30

31  
32 The first gene consistently identified as an obesity gene using GWAS was FTO. Several  
33  
34 SNPs located on its first intron were associated with BMI in European, East Asian and African  
35  
36 populations. [32,33] Following this gene, 75 additional obesity loci have been identified using this  
37  
38 methodology and, although FTO is the gene accounting for most of the inter-individual variability  
39  
40 on BMI, it only explains a 0.34%.[8,33] There are data supporting that alterations in genes related  
41  
42 to mitochondrial function can be involved in obesity, [12,15,20,21,34] but few studies have  
43  
44 analyzed the effect of its variations on BMI or obesity.[19,24] From all genes identified in the  
45  
46 GWAS meta-analysis performed by Speliotes and colleagues,[8] only the *NDUFS3* (NADH  
47  
48 dehydrogenase (ubiquinone) Fe-S protein 3) gene was identified to be within 300 Kb from the  
49  
50 BMI associated SNPs. As these authors indicated, in spite of the large population analyzed in their  
51  
52 study, many genetic variants related to BMI and obesity remain to be identified. The limitations  
53  
54  
55  
56  
57  
58  
59  
60

1  
2 of this meta-analysis come from the different microarrays used, with low coverage in many  
3  
4 genomic regions. Therefore, the *NDUFS5* gene (where rs11205591 is located) has been analyzed  
5  
6 by only one polymorphism in each of the two most used microarrays by Speliotes and in most of  
7  
8 the GWAS performed to date;[8] (<http://www.Illumina.com>; <http://www.affymetrix.com>;  
9  
10 <http://www.ensembl.org>). In addition, representation of Mediterranean populations in Speliotes  
11  
12 and Locke's studies is very small, and, to our knowledge, Spanish populations are not  
13  
14 included.[8,9] Therefore, many important genetic regions, related to BMI and obesity regulation  
15  
16 in these populations may be missing from their work.  
17  
18

19  
20 The present study supports the hypothesis that genetic variations in MRC genes may be  
21  
22 related to obesity susceptibility in the Spanish population. Therefore, these genes could be new  
23  
24 therapeutic targets. Genetics of obesity are complex and not yet well identified, and our data may  
25  
26 contribute to a better understanding. One limitation of this study is the reduced size of the analyzed  
27  
28 populations. However, the statistical power is sufficient for the number of analyzed SNPs. On the  
29  
30 other hand, we have not studied all the possible SNPs present in these MRC genes. Further  
31  
32 functional studies and association analyses in larger samples and other populations should be  
33  
34 carried out to confirm our results.  
35  
36  
37  
38  
39  
40  
41  
42

### 43 AUTHOR CONTRIBUTIONS

44  
45 **G.DM-S.** obtained genetic data, analyzed and interpreted results and wrote the manuscript. **VGA**  
46  
47 obtained genetic data, contributed to analysis and interpretation and reviewed the manuscript.  
48  
49 **JTR, LSBF, MCS, ALS, and AC** obtained population data, made critical revisions of the  
50  
51 manuscript and contributed to the discussion. **JCME, GRM, RC, and MTML** contributed to  
52  
53 population studies and discussion, and reviewed and edited the manuscript. **FJC and ABGG**  
54  
55  
56  
57  
58  
59  
60

1  
2 designed the study, wrote the manuscript, contributed to discussion and reviewed and edited the  
3  
4 manuscript.  
5  
6  
7

## 8 9 **ACKNOWLEDGEMENTS**

10  
11 We thank Dr. Manuel Serrano-Rios (Diabetes Research Laboratory, Biomedical Research  
12  
13 Foundation from University Clinic Hospital San Carlos (Madrid, Spain) and CIBER of Diabetes  
14  
15 and Associated Metabolic Diseases (CIBERDEM), Madrid. Spain) for his kind contribution in the  
16  
17 development of this work.  
18  
19  
20  
21

## 22 23 **FUNDING**

24  
25 This study was supported by CIBER of Physiopathology, Obesity and Nutrition (CIBEROB) and  
26  
27 CIBER of Diabetes and Metabolic Associated Diseases (CIBERDEM), initiatives of Carlos III  
28  
29 Health Institute, Spanish Health Ministry; Project INGENFRED CIBER-02-08-2009  
30  
31 (CIBERDEM); research grants PI070497, PI081592, PI14/00874 and PIE14/00031 from the  
32  
33 “Fondo de Investigaciones Sanitarias”; ACOMP/2009/201, GRUPOS03/101, 2005/027 and  
34  
35 PROMETEO/2009/029 from the Valencian Government and grant SAF2005-02883 from the  
36  
37 Spanish Ministry of Education and Science; GRS 279/A/08 of Regional Health Management of  
38  
39 Castilla y León, Junta de Castilla y León.  
40  
41  
42  
43  
44

## 45 46 **DISCLAIMER**

47  
48 Neither funder played a role in the study design, data analysis or interpretation of the data.  
49  
50  
51

## 52 53 **COMPETING INTERESTS**

54  
55 There are no competing interests to declare  
56  
57  
58  
59  
60



## DATA SHARING STATEMENT

No additional data are available.

## REFERENCES

1. Marques A, Peralta M, Naia A, et al. Prevalence of adult overweight and obesity in 20 European countries, 2014. *Eur J Public Health* 2018; 28:295-300.
2. Stunkard AJ, Foch TT, Hrubec Z. A twin study of human obesity. *JAMA* 1986; 256:51-54.
3. Chung WK, Leibel RL. Considerations regarding the genetics of obesity. *Obesity* (Silver Spring) 2008; 16:S33-39.
4. Sheikh AB, Nasrullah A, Haq S, et al. The Interplay of Genetics and Environmental Factors in the Development of Obesity. *Cureus* 2017; 9:e1435. doi:10.7759/cureus.1435
5. Andreasen CH, Andersen G. Gene-environment interactions and obesity—further aspects of genomewide association studies. *Nutrition* 2009; 25:998-1003.
6. Vimalaswaran KS, Loos RJ. Progress in the genetics of common obesity and type 2 diabetes. *Expert Rev Mol Med* 2010; 12:e7. doi:10.1017/S1462399410001389
7. Fawcett KA, Barroso I. The genetics of obesity: FTO leads the way. *Trends Genet* 2010;26:266-274
8. Speliotes EK, Willer CJ, Berndt SI, et al. Association analyses of 249,796 individuals reveal 18 new loci associated with body mass index. *Nat Genet* 2010; 42:937-948.
9. Locke AE, Kahali B, Berndt SI, et al., Genetic studies of body mass index yield new insights for obesity biology. *Nature* 2015; 518:197-206.
10. Goodarzi MO. Genetics of obesity: what genetic association studies have taught us about the biology of obesity and its complications. *Lancet Diabetes Endocrinol* 2018; 6:223-236.
11. Johannsen DL, Ravussin E. The role of mitochondria in health and disease. *Curr Opin Pharmacol.* 2009; 9:780-786.

12. Abdul-Ghani MA, DeFronzo RA. Mitochondrial dysfunction, insulin resistance, and type 2 diabetes mellitus. *Curr Diab Rep* 2008; 8:173-178.
13. Wang Z, Yuan D, Duan Y, et al. Key factors involved in obesity development. *Eat Weight Disord* 2017. doi: 10.1007/s40519-017-0428-3
14. Szendroedi J, Phielix E, Roden M. The role of mitochondria in insulin resistance and type 2 diabetes mellitus. *Nat Rev Endocrinol* 2011; 8:92-103.
15. Fosslien E. Review: Mitochondrial medicine--cardiomyopathy caused by defective oxidative phosphorylation. *Ann Clin Lab Sci* 2003; 33:371-395.
16. Rötig A, Munnich A. Genetic features of mitochondrial respiratory chain disorders. *J Am Soc Nephrol* 2003; 14:2995-3007.
17. Zhu X, Peng X, Guan MX, et al. Pathogenic mutations of nuclear genes associated with mitochondrial disorders. *Acta Biochim Biophys Sin (Shanghai)* 2009; 41:179-187.
18. Rodenburg RJ. Mitochondrial complex I-linked disease. *Biochim Biophys Acta* 2016; 1857:938-945.
19. Pospisilik JA, Knauf C, Joza N, et al. Targeted deletion of AIF decreases mitochondrial oxidative phosphorylation and protects from obesity and diabetes. *Cell* 2007; 131:476-491.
20. Harper ME, Green K, Brand MD. The efficiency of cellular energy transduction and its implications for obesity. *Annu Rev Nutr* 2008; 28:13-33.
21. Bournat JC, Brown CW. Mitochondrial dysfunction in obesity. *Curr Opin Endocrinol Diabetes Obes* 2010; 17:446-452.
22. de Mello AH, Costa AB, Engel JDG, Rezin GT. Mitochondrial dysfunction in obesity. *Life Sci* 2018; 192:26-32.
23. Dunham-Snary KJ, Ballinger SW. Mitochondrial genetics and obesity: evolutionary adaptation and contemporary disease susceptibility. *Free Radic Biol Med* 2013; 65:1229-1237.
24. Kunej T, Wang Z, Michal JJ, et al. Functional UQCRC1 polymorphisms affect promoter activity and body lipid accumulation. *Obesity (Silver Spring)* 2007; 15:2896-2901.
25. Jackman MR, Ravussin E, Rowe MJ, et al. Effect of a polymorphism in the ND1 mitochondrial gene on human skeletal muscle mitochondrial function. *Obesity (Silver Spring)* 2008; 16:363-368.
26. Mansego ML, Redon J, Marin R, et al. Renin polymorphisms and haplotypes are associated with blood pressure levels and hypertension risk in postmenopausal women. *J Hypertens* 2008; 26:230-237.

- 1  
2 27. Soriguer-Escofet F, Esteva I, Rojo-Martinez G, et al. Diabets Group of the Andalusian Society  
3 of Endocrinology and Nutrtrion. Prevalence of latent autoimmune diabetes of adults (LADA) in  
4 Southern Spain. *Diabetes Res Clin Pract* 2002; 56:213-220.  
5  
6 28. Martínez-Larrad MT, Fernández-Pérez C, González-Sánchez JL, et al., Prevalence of the  
7 metabolic syndrome (ATP-III criteria). Population-based study of rural and urban areas in the  
8 Spanish province of Segovia. *Med Clin (Barc)* 2005; 125(:481-486.  
9  
10 29. Solé X, Guinó E, Valls J, et al. SNPStats: a web tool for the analysis of association studies.  
11 *Bioinformatics* 2006; 22:1928-1929.  
12  
13 30. Grimson A, Farh KK, Johnston WK, et al. MicroRNA targeting specificity in mammals:  
14 determinants beyond seed pairing. *Mol Cell* 2007; 27:91-105.  
15  
16 31. Friedman RC, Farh KK, Burge CB, et al. Most mammalian mRNAs are conserved targets of  
17 microRNAs. *Genome Res* 2009; 19:92-105.  
18  
19 32. Frayling TM, Timpson NJ, Weedon MN, et al., A common variant in the FTO gene is  
20 associated with body mass index and predisposes to childhood and adult obesity. *Science* 2007;  
21 316:889-894.  
22  
23 33. Loos RJ, Yeo GS. The bigger picture of FTO: the first GWAS-identified obesity gene. *Nat Rev*  
24 *Endocrinol* 2014; 10:51-61.  
25  
26 34. Okura T, Koda M, Ando F, et al. Association of the mitochondrial DNA 15497G/A  
27 polymorphism with obesity in a middle-aged and elderly Japanese population. *Hum Genet* 2003;  
28 113:432-436.  
29  
30  
31  
32  
33  
34  
35  
36  
37  
38  
39  
40  
41  
42  
43  
44  
45  
46  
47  
48  
49  
50  
51  
52  
53  
54  
55  
56  
57  
58  
59  
60

## LEGENDS

**Figure 1.** BMI differences found for the associated SNPs genotypes for each population analyzed in this study. Values are expressed as BMI difference means, showing 95% confidence interval.

**A)** rs10891319 BMI differences between AG-GG and AA genotypes, taking the first one (BMI difference=0 for carriers of AG-GG genotype) as reference. **B)** rs11205591 BMI differences for CC-CG and GG genotypes, with the first one as a reference (CC-CG genotype BMI difference=0).

**Figure 2.** Additive effect of rs10891319 and rs11205591 genotype combination in BMI and obesity risk. **A)** BMI means. \* indicates a p-value < 0.005. **B)** Obesity risk ORs. Rs11205591 CC-CG / rs10891319 AA genotypes were taken as a reference (OR=1). The obtained p-value was <0.003. Error bars show standard error. Data are expressed as rs11205591 / rs10891319 genotypes

1  
2  
3  
4  
5  
6  
7  
8  
9  
10  
11  
12  
13  
14  
15  
16  
17  
18  
19  
20  
21  
22  
23  
24  
25  
26  
27  
28  
29  
30  
31  
32  
33  
34  
35  
36  
37  
38  
39  
40  
41  
42  
43  
44  
45  
46

Figure 1



Figure 2.

A)

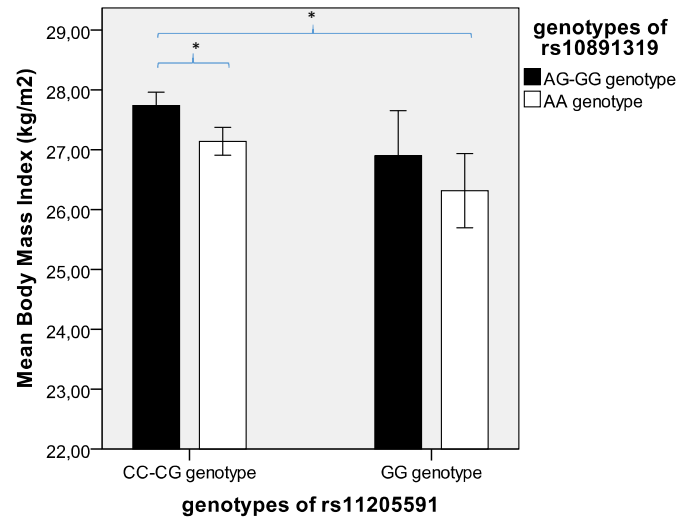

B)



**Table 1S:** Description of selected SNPs

| Gene Name | Chromosome | SNP Name   | chromosome position (GRCh38p10) | Most severe consequence | HGVS Name           | Reference sequence | MAF      | tag SNP |
|-----------|------------|------------|---------------------------------|-------------------------|---------------------|--------------------|----------|---------|
| COX5A     | 15         | rs1133322  | 74920016                        | DOWNSTREAM              | c.*436T>C           | NM_004255.3        | 0.25 (G) | 1**     |
| COX5B     | 2          | rs1470625  | 97649028                        | DOWNSTREAM              | g.97649028C>A       | NC_000012.12       | 0.46 (C) | 2**     |
|           |            | rs17022045 | 97645225                        | UPSTREAM                | c.-862C>G           | NM_001862.2        | 0.13 (G) | 1**     |
| COX6A1    | 12         | rs17431357 | 120442631                       | UPSTREAM                | g.120442631C>T      | NC_000012.12       | 0.04 (T) |         |
|           |            | rs12310837 | 120442769                       | UPSTREAM                | g.120442769A>G      | NC_000012.12       | 0.15 (G) |         |
|           |            | rs2076022  | 120437987                       | UPSTREAM                | c.-140C>T           | NM_004373.3        | 0.49 (T) | 2**     |
| COX6B1    | 19         | rs4806187  | 35658859                        | DOWNSTREAM              | c.*212A>G           | NM_001863.4        | 0.33 (A) | 1**     |
| COX6C     | 8          | rs1130569  | 99887565                        | SYNONYMOUS_CODING       | p.Tyr56=            | NP_004365.1        | 0.25 (A) |         |
|           |            | rs4626565  | 99878314                        | INTRONIC                | c.*16-49A>G         | NM_004374.3        | 0.23 (C) | 1**     |
| COX7A1    | 19         | rs753420   | 36152793                        | 5PRIME_UTR              | c.-386A>C           | NM_001864.3        | 0.40 (G) | 1**     |
|           |            | rs7255180  | 36149417                        | INTRONIC                | c.722-161C>T        | NM_001003962.2     | 0.02 (T) |         |
| COX7A2    | 6          | rs436898   | 75235832                        | DOWNSTREAM              | g.75235832A>C       | NC_000006.12       | 0.16 (A) |         |
|           |            | rs683943   | 75252092                        | UPSTREAM                | g.75252092C>G       | NC_000006.13       | 0.05 (C) |         |
|           |            | rs9360898  | 75243989                        | 5PRIME_UTR              | c.-159A>C           | NM_001865.3        | 0.21 (G) | 3**     |
| COX7B2    | 4          | rs9790574  | 46732884                        | DOWNSTREAM              | g.46732884C>T       | NC_000004.12       | 0.25 (T) |         |
| COX7C     | 5          | rs16902285 | 86621753                        | DOWNSTREAM              | g.86621753T>G       | NC_000005.10       | 0.07 (G) |         |
|           |            | rs13161296 | 86617233                        | UPSTREAM                | c.-823C>T           | NM_001867.2        | 0.01 (T) | 1**     |
|           |            | rs2410718  | 86622655                        | DOWNSTREAM              | g.86622655G>A       | NC_000005.10       | 0.12 (A) |         |
| COX8C     | 14         | rs2089095  | 93350593                        | INTRONIC                | c.-<br>351+17070C>G | NM_020818.4        | 0.11 (G) |         |
| NDUFS1    | 2          | rs1053517  | 206122291                       | DOWNSTREAM              | g.206122291A>G      | NC_000002.12       | 0.49 (G) | 1**     |
|           |            | rs3770989  | 206124027                       | 3PRIME_UTR              | c.*158T>C           | NM_001199981.1     | 0.03 (G) | 3**     |
|           |            | rs11548670 | 206147759                       | SYNONYMOUS_CODING       | p.Asp102=           | NP_001186910.1     | 0.07 (G) | 2**     |

**Table 1S cont:** Description of selected SNPs

| Gene Name | Chromosome | SNP Name   | chromosome position (GRCh38p10) | Most severe consequence            | HGVS Name      | Reference sequence | MAF      | tag SNP     |
|-----------|------------|------------|---------------------------------|------------------------------------|----------------|--------------------|----------|-------------|
| NDUFS2    | 1          | rs4656994  | 161210087                       | INTRONIC                           | c.703-24G>A    | NM_001166159.1     | 0.26 (A) | 3**         |
|           |            | rs1136224  | 161214307                       | 3PRIME_UTR                         | c.*366A>G      | NM_001166159.1     | 0.18 (G) | 6**         |
|           |            | rs1136207  | 161213726                       | SYNONYMOUS_CODING                  | p.Ala430=      | NP_001159631.1     | 0.16 (T) |             |
|           |            | rs4656993  | 161206347                       | INTRONIC                           | c.203-60A>G    | NM_001166159.1     | 0.30 (A) |             |
|           |            | rs11587213 | 161215085                       | UPSTREAM                           | g.161215085A>G | NC_000001.11       | 0.15 (G) | 5**         |
| NDUFS3    | 11         | rs10742816 | 47585432                        | UPSTREAM                           | g.47585432C>T  | NC_000011.10       | 0.25 (C) | 1**         |
| NDUFS4    | 5          | rs31304    | 53646253                        | SYNONYMOUS_CODING                  | p.Gly66=       | NP_001304980.1     | 0.06 (A) |             |
|           |            | rs567      | 53683267                        | 3PRIME_UTR                         | c.*46G>A       | NM_002495.3        | 0.38 (A) | 3**,5**,6** |
|           |            | rs535277   | 53658684                        | INTRONIC                           | c.424+60T>G    | NM_002495.3        | 0.29 (G) |             |
| NDUFS5    | 1          | rs1984600  | 39026255                        | UPSTREAM                           | c.-150G>C      | NM_004552.2        | 0.46 (G) | 1**         |
|           |            | rs11205591 |                                 | DOWNSTREAM                         |                |                    |          | 2**         |
| NDUFS6    | 5          |            | 39035577                        |                                    | g.39035577C>G  | NC_000001.11       | 0.24 (G) |             |
|           |            | rs11953620 | 1818516                         | DOWNSTREAM                         | g.1818516C>T   | NC_000005.10       | 0.42 (T) |             |
|           |            | rs4975851  | 1817222                         | DOWNSTREAM                         | g.1817222C>T   | NC_000005.10       | 0.38 (C) |             |
| NDUFS7    | 19         | rs11666067 | 1389518                         | non coding transcript exon variant | c.228+580C>A   | NM_024407.4        | 0.46 (A) |             |
| SDHB      | 1          | rs1022580  | 17033181                        | INTRONIC                           | c.201-36G>T    | NM_003000.2        | 0.04 (C) | 1**         |
|           |            | rs2647169  | 17044728                        | INTRONIC                           | c.200+33G>A    | NM_003000.2        | 0.11 (T) | 3**         |
|           |            | rs11203280 | 17016288                        | UPSTREAM                           | g.17016288G>T  | NC_000001.11       | 0.50 (G) |             |
|           |            | rs9435739  | 17016429                        | UPSTREAM                           | g.17016429G>A  | NC_000001.11       | 0.48 (A) |             |



**Table 1S cont2:** Description of selected SNPs

| Gene Name | Chromosome | SNP Name   | chromosome position (GRCh38p10) | Most severe consequence | HGVS Name      | Reference sequence | MAF      | tag SNP |
|-----------|------------|------------|---------------------------------|-------------------------|----------------|--------------------|----------|---------|
| SDHC      | 1          | rs4600063  | 161363401                       | 3PRIME_UTR              | g.161363401A>G | NC_000001.11       | 0.17 (G) | 3**     |
|           |            | rs13374037 | 161365491                       | 3PRIME_UTR              | g.161365491T>A | NC_000001.11       | 0.17 (A) |         |
| SDHD      | 11         | rs10891319 | 112096881                       | INTRONIC                | g.112096881A>G | NC_000011.10       | 0.35 (G) |         |
| UQCRB     | 8          | rs10504961 | 96227901                        | 3PRIME_UTR              | g.96227901C>T  | NC_000008.11       | 0.37 (T) |         |
| UQCRQ     | 5          | rs803224   | 132870812                       | UPSTREAM                | g.132870812G>A | NC_000005.10       | 0.18 (G) |         |
|           |            | rs17624157 | 132868339                       | UPSTREAM                | g.132868339G>A | NC_000005.10       | 0.05 (A) |         |
| GDF9      | 5          | rs39830    | 132865726                       | UPSTREAM                | g.132865726G>A | NC_000005.10       | 0.36 (C) | 3**,4** |
|           |            | rs30177    | 132866719                       | 5PRIME_UTR              | g.132866719C>G | NC_000005.10       |          |         |

SNP Name: dbSNP 149, Ensemble release 89. MAF: Minor allele frequency. HGVS name: nomenclature following Human Genome Variation Society guidelines

Table 1. STREGA reporting recommendations, extended from STROBE Statement

| Item                        | Item number | STROBE Guideline                                                                                     | Extension for Genetic Association Studies (STREGA)                                                     | Page # in Manuscript<br>(or N/A if not applicable) |
|-----------------------------|-------------|------------------------------------------------------------------------------------------------------|--------------------------------------------------------------------------------------------------------|----------------------------------------------------|
| <b>Title and Abstract</b>   | 1           | (a) Indicate the study's design with a commonly used term in the title or the abstract.              |                                                                                                        | 1                                                  |
|                             |             | (b) Provide in the abstract an informative and balanced summary of what was done and what was found. |                                                                                                        | 2                                                  |
| <b>Introduction</b>         |             |                                                                                                      |                                                                                                        |                                                    |
| <i>Background rationale</i> | 2           | Explain the scientific background and rationale for the investigation being reported.                |                                                                                                        | 3-4                                                |
| <i>Objectives</i>           | 3           | State specific objectives, including any pre-specified hypotheses.                                   | <b>State if the study is the first report of a genetic association, a replication effort, or both.</b> | 4                                                  |
| <b>Methods</b>              |             |                                                                                                      |                                                                                                        |                                                    |
| <i>Study design</i>         | 4           | Present key elements of study design early in the paper.                                             |                                                                                                        | 5-6                                                |

| Item                | Item number | STROBE Guideline                                                                                                                                                                                                                                                                                                                                                                                                                                                                                                                                                                                                                                                                                                                        | Extension for Genetic Association Studies (STREGA)                                                                                                                 | Page # in Manuscript<br>(or N/A if not applicable) |
|---------------------|-------------|-----------------------------------------------------------------------------------------------------------------------------------------------------------------------------------------------------------------------------------------------------------------------------------------------------------------------------------------------------------------------------------------------------------------------------------------------------------------------------------------------------------------------------------------------------------------------------------------------------------------------------------------------------------------------------------------------------------------------------------------|--------------------------------------------------------------------------------------------------------------------------------------------------------------------|----------------------------------------------------|
| <i>Setting</i>      | 5           | Describe the setting, locations and relevant dates, including periods of recruitment, exposure, follow-up, and data collection.                                                                                                                                                                                                                                                                                                                                                                                                                                                                                                                                                                                                         |                                                                                                                                                                    | 5                                                  |
| <i>Participants</i> | 6           | <p>(a) <b>Cohort study</b> – Give the eligibility criteria, and the sources and methods of selection of participants. Describe methods of follow-up.</p> <p><b>Case-control study</b> – Give the eligibility criteria, and the sources and methods of case ascertainment and control selection. Give the rationale for the choice of cases and controls.</p> <p><b>Cross-sectional study</b> – Give the eligibility criteria, and the sources and methods of selection of participants.</p> <hr/> <p>(b) <b>Cohort study</b> – For matched studies, give matching criteria and number of exposed and unexposed.</p> <p><b>Case-control study</b> – For matched studies, give matching criteria and the number of controls per case.</p> | <p><b>Give information on the criteria and methods for selection of subsets of participants from a larger study, when relevant.</b></p>                            | 5                                                  |
| <i>Variables</i>    | 7           | (a) Clearly define all outcomes, exposures, predictors, potential confounders, and effect modifiers. Give diagnostic criteria, if applicable.                                                                                                                                                                                                                                                                                                                                                                                                                                                                                                                                                                                           | (b) <b>Clearly define genetic exposures (genetic variants) using a widely-used nomenclature system. Identify variables likely to be associated with population</b> | 6                                                  |

| Item                            | Item number | STROBE Guideline                                                                                                                                                                          | Extension for Genetic Association Studies (STREGA)                                                                                                                                                                                                                                                                                                                                                                                                                | Page # in Manuscript<br>(or N/A if not applicable) |
|---------------------------------|-------------|-------------------------------------------------------------------------------------------------------------------------------------------------------------------------------------------|-------------------------------------------------------------------------------------------------------------------------------------------------------------------------------------------------------------------------------------------------------------------------------------------------------------------------------------------------------------------------------------------------------------------------------------------------------------------|----------------------------------------------------|
|                                 |             |                                                                                                                                                                                           | <i>stratification (confounding by ethnic origin).</i>                                                                                                                                                                                                                                                                                                                                                                                                             |                                                    |
| <i>Data sources measurement</i> | 8*          | (a) For each variable of interest, give sources of data and details of methods of assessment (measurement). Describe comparability of assessment methods if there is more than one group. | <b>(b) Describe laboratory methods, including source and storage of DNA, genotyping methods and platforms (including the allele calling algorithm used, and its version), error rates and call rates. State the laboratory/centre where genotyping was done. Describe comparability of laboratory methods if there is more than one group. Specify whether genotypes were assigned using all of the data from the study simultaneously or in smaller batches.</b> | 5-6                                                |
| <i>Bias</i>                     | 9           | (a) Describe any efforts to address potential sources of bias.                                                                                                                            | <b>(b) For quantitative outcome variables, specify if any investigation of potential bias resulting</b>                                                                                                                                                                                                                                                                                                                                                           |                                                    |

| Item                          | Item number | STROBE Guideline                                                                                                               | Extension for Genetic Association Studies (STREGA)                                                                                                                      | Page # in Manuscript<br>(or N/A if not applicable) |
|-------------------------------|-------------|--------------------------------------------------------------------------------------------------------------------------------|-------------------------------------------------------------------------------------------------------------------------------------------------------------------------|----------------------------------------------------|
|                               |             |                                                                                                                                | <i>from pharmacotherapy was undertaken. If relevant, describe the nature and magnitude of the potential bias, and explain what approach was used to deal with this.</i> | NA                                                 |
| <i>Study size</i>             | 10          | Explain how the study size was arrived at.                                                                                     |                                                                                                                                                                         | 5                                                  |
| <i>Quantitative variables</i> | 11          | Explain how quantitative variables were handled in the analyses. If applicable, describe which groupings were chosen, and why. | <i>If applicable, describe how effects of treatment were dealt with.</i>                                                                                                | 5-6                                                |
| <i>Statistical methods</i>    | 12          | (a) Describe all statistical methods, including those used to control for confounding.                                         | <i>State software version used and options (or settings) chosen.</i>                                                                                                    | 7                                                  |
|                               |             | (b) Describe any methods used to examine subgroups and interactions.                                                           |                                                                                                                                                                         | 7                                                  |
|                               |             | (c) Explain how missing data were addressed.                                                                                   |                                                                                                                                                                         | 7                                                  |

| Item | Item number | STROBE Guideline                                                                                                                                                                                                                                                                                                           | Extension for Genetic Association Studies (STREGA)                                   | Page # in Manuscript<br>(or N/A if not applicable) |
|------|-------------|----------------------------------------------------------------------------------------------------------------------------------------------------------------------------------------------------------------------------------------------------------------------------------------------------------------------------|--------------------------------------------------------------------------------------|----------------------------------------------------|
|      | (d)         | <p><b>Cohort study</b> – If applicable, explain how loss to follow-up was addressed.</p> <p><b>Case-control study</b> – If applicable, explain how matching of cases and controls was addressed.</p> <p><b>Cross-sectional study</b> – If applicable, describe analytical methods taking account of sampling strategy.</p> |                                                                                      | NA                                                 |
|      | (e)         | Describe any sensitivity analyses.                                                                                                                                                                                                                                                                                         |                                                                                      |                                                    |
|      |             |                                                                                                                                                                                                                                                                                                                            | <i>(f) State whether Hardy-Weinberg equilibrium was considered and, if so, how.</i>  | 7                                                  |
|      |             |                                                                                                                                                                                                                                                                                                                            | <i>(g) Describe any methods used for inferring genotypes or haplotypes.</i>          | 7                                                  |
|      |             |                                                                                                                                                                                                                                                                                                                            | <i>(h) Describe any methods used to assess or address population stratification.</i> | NA                                                 |
|      |             |                                                                                                                                                                                                                                                                                                                            | <i>(i) Describe any methods used to address multiple</i>                             |                                                    |

| Item                    | Item number | STROBE Guideline                                                                                                                                                                                                | Extension for Genetic Association Studies (STREGA)                                                                                  | Page # in Manuscript<br>(or N/A if not applicable) |
|-------------------------|-------------|-----------------------------------------------------------------------------------------------------------------------------------------------------------------------------------------------------------------|-------------------------------------------------------------------------------------------------------------------------------------|----------------------------------------------------|
|                         |             |                                                                                                                                                                                                                 | <i>comparisons or to control risk of false positive findings.</i>                                                                   | 7                                                  |
|                         |             |                                                                                                                                                                                                                 | <i>(j) Describe any methods used to address and correct for relatedness among subjects</i>                                          | NA                                                 |
| <b>Results</b>          |             |                                                                                                                                                                                                                 |                                                                                                                                     |                                                    |
| <i>Participants</i>     | 13*         | (a) Report the numbers of individuals at each stage of the study – e.g., numbers potentially eligible, examined for eligibility, confirmed eligible, included in the study, completing follow-up, and analysed. | <b>Report numbers of individuals in whom genotyping was attempted and numbers of individuals in whom genotyping was successful.</b> | 5-6                                                |
|                         |             | (b) Give reasons for non-participation at each stage.                                                                                                                                                           |                                                                                                                                     | 5                                                  |
|                         |             | (c) Consider use of a flow diagram.                                                                                                                                                                             |                                                                                                                                     |                                                    |
| <i>Descriptive data</i> | 14*         | (a) Give characteristics of study participants (e.g., demographic, clinical, social) and information on exposures and potential confounders.                                                                    | <b>Consider giving information by genotype.</b>                                                                                     | 5                                                  |

| Item                | Item number | STROBE Guideline                                                                                                                                                                                                 | Extension for Genetic Association Studies (STREGA)                       | Page # in Manuscript<br>(or N/A if not applicable) |
|---------------------|-------------|------------------------------------------------------------------------------------------------------------------------------------------------------------------------------------------------------------------|--------------------------------------------------------------------------|----------------------------------------------------|
|                     |             | (b) Indicate the number of participants with missing data for each variable of interest.                                                                                                                         |                                                                          | 6                                                  |
|                     |             | (c) <b>Cohort study</b> – Summarize follow-up time, e.g. average and total amount.                                                                                                                               |                                                                          | NA                                                 |
| <i>Outcome data</i> | 15 *        | <b>Cohort study</b> —Report numbers of outcome events or summary measures over time.                                                                                                                             | <b>Report outcomes (phenotypes) for each genotype category over time</b> |                                                    |
|                     |             | <b>Case-control study</b> – Report numbers in each exposure category, or summary measures of exposure.                                                                                                           | <b>Report numbers in each genotype category</b>                          |                                                    |
|                     |             | <b>Cross-sectional study</b> – Report numbers of outcome events or summary measures.                                                                                                                             | <b>Report outcomes (phenotypes) for each genotype category</b>           | 10-11                                              |
| <i>Main results</i> | 16          | (a) Give unadjusted estimates and, if applicable, confounder-adjusted estimates and their precision (e.g., 95% confidence intervals). Make clear which confounders were adjusted for and why they were included. |                                                                          | 7                                                  |



| Item                  | Item number | STROBE Guideline                                                                                                  | Extension for Genetic Association Studies (STREGA)                                                                         | Page # in Manuscript<br>(or N/A if not applicable) |
|-----------------------|-------------|-------------------------------------------------------------------------------------------------------------------|----------------------------------------------------------------------------------------------------------------------------|----------------------------------------------------|
|                       |             | (b) Report category boundaries when continuous variables were categorized.                                        |                                                                                                                            | 6                                                  |
|                       |             | (c) If relevant, consider translating estimates of relative risk into absolute risk for a meaningful time period. |                                                                                                                            | NA                                                 |
|                       |             |                                                                                                                   | <i>(d) Report results of any adjustments for multiple comparisons.</i>                                                     | 10-11                                              |
| <i>Other analyses</i> | 17          | (a) Report other analyses done – e.g., analyses of subgroups and interactions, and sensitivity analyses.          |                                                                                                                            |                                                    |
|                       |             |                                                                                                                   | <i>(b) If numerous genetic exposures (genetic variants) were examined, summarize results from all analyses undertaken.</i> | 10-11                                              |
|                       |             |                                                                                                                   | <i>(c) If detailed results are available elsewhere, state how they can be accessed.</i>                                    | NA                                                 |
| <b>Discussion</b>     |             |                                                                                                                   |                                                                                                                            |                                                    |
| <i>Key results</i>    | 18          | Summarize key results with reference to study objectives.                                                         |                                                                                                                            | 14                                                 |

| Item                     | Item number | STROBE Guideline                                                                                                                                                            | Extension for Genetic Association Studies (STREGA) | Page # in Manuscript<br>(or N/A if not applicable) |
|--------------------------|-------------|-----------------------------------------------------------------------------------------------------------------------------------------------------------------------------|----------------------------------------------------|----------------------------------------------------|
| <i>Limitations</i>       | 19          | Discuss limitations of the study, taking into account sources of potential bias or imprecision. Discuss both direction and magnitude of any potential bias.                 |                                                    | 14                                                 |
| <i>Interpretation</i>    | 20          | Give a cautious overall interpretation of results considering objectives, limitations, multiplicity of analyses, results from similar studies, and other relevant evidence. |                                                    | 14                                                 |
| <i>Generalizability</i>  | 21          | Discuss the generalizability (external validity) of the study results.                                                                                                      |                                                    | 14                                                 |
| <b>Other Information</b> |             |                                                                                                                                                                             |                                                    |                                                    |
| <i>Funding</i>           | 22          | Give the source of funding and the role of the funders for the present study and, if applicable, for the original study on which the present article is based.              |                                                    | 15                                                 |

STREGA = STrengthening the REporting of Genetic Association studies; STROBE = STrengthening the Reporting of Observational Studies in Epidemiology.

\* Give information separately for cases and controls in case-control studies and, if applicable, for exposed and unexposed groups in cohort and cross-sectional studies.
