# Supplementary material for: Respiratory chain polymorphisms and obesity in the Spanish population, a cross-sectional study
Source: PubMed Central journal article supplement — BMJ Open. 2019 Feb 5;9(2):e027004. doi: 10.1136/bmjopen-2018-027004 (PMC6377525; doi:10.1136/bmjopen-2018-027004), 2019-02-05
Supplement: bmjopen-2018-027004supp001.pdf [file bmjopen-2018-027004supp001.pdf]

**Table 1S:** Description of selected SNPs

| Gene Name | Chromosome | SNP Name   | chromosome position (GRCh38p10) | Most severe consequence | HGVS Name           | Reference sequence | MAF      | tag SNP |
|-----------|------------|------------|---------------------------------|-------------------------|---------------------|--------------------|----------|---------|
| COX5A     | 15         | rs1133322  | 74920016                        | DOWNSTREAM              | c.*436T>C           | NM_004255.3        | 0.25 (G) | 1**     |
| COX5B     | 2          | rs1470625  | 97649028                        | DOWNSTREAM              | g.97649028C>A       | NC_000012.12       | 0.46 (C) | 2**     |
|           |            | rs17022045 | 97645225                        | UPSTREAM                | c.-862C>G           | NM_001862.2        | 0.13 (G) | 1**     |
| COX6A1    | 12         | rs17431357 | 120442631                       | UPSTREAM                | g.120442631C>T      | NC_000012.12       | 0.04 (T) |         |
|           |            | rs12310837 | 120442769                       | UPSTREAM                | g.120442769A>G      | NC_000012.12       | 0.15 (G) |         |
|           |            | rs2076022  | 120437987                       | UPSTREAM                | c.-140C>T           | NM_004373.3        | 0.49 (T) | 2**     |
| COX6B1    | 19         | rs4806187  | 35658859                        | DOWNSTREAM              | c.*212A>G           | NM_001863.4        | 0.33 (A) | 1**     |
| COX6C     | 8          | rs1130569  | 99887565                        | SYNONYMOUS_CODING       | p.Tyr56=            | NP_004365.1        | 0.25 (A) |         |
|           |            | rs4626565  | 99878314                        | INTRONIC                | c.*16-49A>G         | NM_004374.3        | 0.23 (C) | 1**     |
| COX7A1    | 19         | rs753420   | 36152793                        | 5PRIME_UTR              | c.-386A>C           | NM_001864.3        | 0.40 (G) | 1**     |
|           |            | rs7255180  | 36149417                        | INTRONIC                | c.722-161C>T        | NM_001003962.2     | 0.02 (T) |         |
| COX7A2    | 6          | rs436898   | 75235832                        | DOWNSTREAM              | g.75235832A>C       | NC_000006.12       | 0.16 (A) |         |
|           |            | rs683943   | 75252092                        | UPSTREAM                | g.75252092C>G       | NC_000006.13       | 0.05 (C) |         |
|           |            | rs9360898  | 75243989                        | 5PRIME_UTR              | c.-159A>C           | NM_001865.3        | 0.21 (G) | 3**     |
| COX7B2    | 4          | rs9790574  | 46732884                        | DOWNSTREAM              | g.46732884C>T       | NC_000004.12       | 0.25 (T) |         |
| COX7C     | 5          | rs16902285 | 86621753                        | DOWNSTREAM              | g.86621753T>G       | NC_000005.10       | 0.07 (G) |         |
|           |            | rs13161296 | 86617233                        | UPSTREAM                | c.-823C>T           | NM_001867.2        | 0.01 (T) | 1**     |
|           |            | rs2410718  | 86622655                        | DOWNSTREAM              | g.86622655G>A       | NC_000005.10       | 0.12 (A) |         |
| COX8C     | 14         | rs2089095  | 93350593                        | INTRONIC                | c.-<br>351+17070C>G | NM_020818.4        | 0.11 (G) |         |
| NDUFS1    | 2          | rs1053517  | 206122291                       | DOWNSTREAM              | g.206122291A>G      | NC_000002.12       | 0.49 (G) | 1**     |
|           |            | rs3770989  | 206124027                       | 3PRIME_UTR              | c.*158T>C           | NM_001199981.1     | 0.03 (G) | 3**     |
|           |            | rs11548670 | 206147759                       | SYNONYMOUS_CODING       | p.Asp102=           | NP_001186910.1     | 0.07 (G) | 2**     |

**Table 1S cont:** Description of selected SNPs

| Gene Name | Chromosome | SNP Name   | chromosome position (GRCh38p10) | Most severe consequence            | HGVS Name      | Reference sequence | MAF      | tag SNP     |
|-----------|------------|------------|---------------------------------|------------------------------------|----------------|--------------------|----------|-------------|
| NDUFS2    | 1          | rs4656994  | 161210087                       | INTRONIC                           | c.703-24G>A    | NM_001166159.1     | 0.26 (A) | 3**         |
|           |            | rs1136224  | 161214307                       | 3PRIME_UTR                         | c.*366A>G      | NM_001166159.1     | 0.18 (G) | 6**         |
|           |            | rs1136207  | 161213726                       | SYNONYMOUS_CODING                  | p.Ala430=      | NP_001159631.1     | 0.16 (T) |             |
|           |            | rs4656993  | 161206347                       | INTRONIC                           | c.203-60A>G    | NM_001166159.1     | 0.30 (A) |             |
|           |            | rs11587213 | 161215085                       | UPSTREAM                           | g.161215085A>G | NC_000001.11       | 0.15 (G) | 5**         |
| NDUFS3    | 11         | rs10742816 | 47585432                        | UPSTREAM                           | g.47585432C>T  | NC_000011.10       | 0.25 (C) | 1**         |
| NDUFS4    | 5          | rs31304    | 53646253                        | SYNONYMOUS_CODING                  | p.Gly66=       | NP_001304980.1     | 0.06 (A) |             |
|           |            | rs567      | 53683267                        | 3PRIME_UTR                         | c.*46G>A       | NM_002495.3        | 0.38 (A) | 3**,5**,6** |
|           |            | rs535277   | 53658684                        | INTRONIC                           | c.424+60T>G    | NM_002495.3        | 0.29 (G) |             |
| NDUFS5    | 1          | rs1984600  | 39026255                        | UPSTREAM                           | c.-150G>C      | NM_004552.2        | 0.46 (G) | 1**         |
|           |            | rs11205591 |                                 | DOWNSTREAM                         |                |                    |          | 2**         |
| NDUFS6    | 5          |            | 39035577                        |                                    | g.39035577C>G  | NC_000001.11       | 0.24 (G) |             |
|           |            | rs11953620 | 1818516                         | DOWNSTREAM                         | g.1818516C>T   | NC_000005.10       | 0.42 (T) |             |
| NDUFS7    | 19         | rs4975851  | 1817222                         | DOWNSTREAM                         | g.1817222C>T   | NC_000005.10       | 0.38 (C) |             |
|           |            | rs11666067 | 1389518                         | non coding transcript exon variant | c.228+580C>A   | NM_024407.4        | 0.46 (A) |             |
| SDHB      | 1          | rs1022580  | 17033181                        | INTRONIC                           | c.201-36G>T    | NM_003000.2        | 0.04 (C) | 1**         |
|           |            | rs2647169  | 17044728                        | INTRONIC                           | c.200+33G>A    | NM_003000.2        | 0.11 (T) | 3**         |
|           |            | rs11203280 | 17016288                        | UPSTREAM                           | g.17016288G>T  | NC_000001.11       | 0.50 (G) |             |
|           |            | rs9435739  | 17016429                        | UPSTREAM                           | g.17016429G>A  | NC_000001.11       | 0.48 (A) |             |

**Table 1S cont2:** Description of selected SNPs

| Gene Name | Chromosome | SNP Name   | chromosome position (GRCh38p10) | Most severe consequence | HGVS Name      | Reference sequence | MAF      | tag SNP |
|-----------|------------|------------|---------------------------------|-------------------------|----------------|--------------------|----------|---------|
| SDHC      | 1          | rs4600063  | 161363401                       | 3PRIME_UTR              | g.161363401A>G | NC_000001.11       | 0.17 (G) | 3**     |
|           |            | rs13374037 | 161365491                       | 3PRIME_UTR              | g.161365491T>A | NC_000001.11       | 0.17 (A) |         |
| SDHD      | 11         | rs10891319 | 112096881                       | INTRONIC                | g.112096881A>G | NC_000011.10       | 0.35 (G) |         |
| UQCRB     | 8          | rs10504961 | 96227901                        | 3PRIME_UTR              | g.96227901C>T  | NC_000008.11       | 0.37 (T) |         |
| UQCRQ     | 5          | rs803224   | 132870812                       | UPSTREAM                | g.132870812G>A | NC_000005.10       | 0.18 (G) |         |
|           |            | rs17624157 | 132868339                       | UPSTREAM                | g.132868339G>A | NC_000005.10       | 0.05 (A) |         |
| GDF9      | 5          | rs39830    | 132865726                       | UPSTREAM                | g.132865726G>A | NC_000005.10       | 0.36 (C) | 3**,4** |
|           |            | rs30177    | 132866719                       | 5PRIME_UTR              | g.132866719C>G | NC_000005.10       |          |         |

SNP Name: dbSNP 149, Ensemble release 89. MAF: Minor allele frequency. HGVS name: nomenclature following Human Genome Variation Society guidelines
